# Supplementary material for: Base-promoted amide synthesis from aliphatic amines and ynones as acylation agents through C–C bond cleavage
Source: Royal Society of Chemistry journal article supplement (doi:10.1039/c7cc09310a), 2018-01-01

# Base-mediated formation of amides from aliphatic amines and ynones as acylation agents via C–C bond cleavage at room temperature

Guolin Cheng,<sup>\*a</sup> Weiwei Lv,<sup>a</sup> Changsheng Kuai,<sup>a</sup> Si Wen<sup>a</sup> and Shangyun Xiao<sup>a</sup>

<sup>a</sup>College of Materials Science & Engineering, Huaqiao University, Xiamen 361021, China

## Table of Contents

1. General Information S2
2. General Procedure for Synthesis of 3a-l, 4a-u. S3
3. <sup>1</sup>H and <sup>13</sup>C NMR Spectra S10

## 1. General Information

All reagents were used directly without further purification. Silica gel was purchased from Qing Dao Hai Yang Chemical Industry Co.  $^1\text{H}$  and  $^{13}\text{C}$  NMR spectra were measured on a 400 MHz Bruker spectrometer ( $^1\text{H}$  400 MHz,  $^{13}\text{C}$ 100 MHz), using  $\text{CDCl}_3$  as the solvent with tetramethylsilane (TMS) as the internal standard at room temperature. HRMS-ESI spectra were obtained on Agilent 6450 spectrometer. The products listed below were determined by  $^1\text{H}$ ,  $^{13}\text{C}$  NMR. PE is petroleum ether (60–90 °C).

## 2. General Procedure for Synthesis of 3a-l, 4a-u.

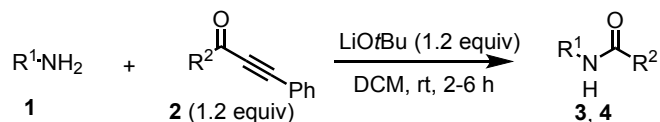

LiOtBu (20 mg, 0.24 mmol) was added to a solution of amines **1** (0.2 mmol) in dry dichloromethane (1.0 mL). The solution was stirred for 5 min at room temperature, then ynones **2** (0.24 mmol) was added. The solution was stirred for another 2-6 h at room temperature. After the reaction finished, the organic layer was washed with saturated aqueous sodium chloride (2.0 mL), dried over sodium sulfate, filtered and concentrated. The residue was purified by column chromatography (ethyl acetate/PE = 1/4) to yield the desired amides. Note: in the case of **4q**, ynones **2a** (0.48 mmol) was used.

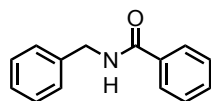

### *N*-benzylbenzamide (**3a**)<sup>1</sup>

Substrate **3a** was obtained as white powder (34.6 mg, 82%); <sup>1</sup>H NMR (400 MHz, CDCl<sub>3</sub>) δ 7.78 (d, *J* = 7.6 Hz, 2H), 7.48 (t, *J* = 7.3 Hz, 1H), 7.40 (t, *J* = 7.6 Hz, 2H), 7.37 – 7.24 (m, 5H), 6.58 (s, 1H), 4.62 (d, *J* = 5.7 Hz, 2H); <sup>13</sup>C NMR (100 MHz, CDCl<sub>3</sub>) δ 167.3, 138.2, 134.3, 131.5, 128.7, 128.5, 127.8, 127.5, 126.9, 44.1.

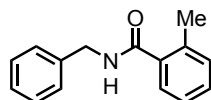

### *N*-benzyl-2-methylbenzamide (**3b**)<sup>1</sup>

Substrate **3b** was obtained as white powder (22.5 mg, 50%); <sup>1</sup>H NMR (400 MHz, CDCl<sub>3</sub>) δ 7.40 – 7.25 (m, 7H), 7.22 – 7.15 (m, 2H), 6.08 (s, 1H), 4.61 (d, *J* = 5.7 Hz, 2H), 2.46 (s, 3H); <sup>13</sup>C NMR (100 MHz, CDCl<sub>3</sub>) δ 169.9, 138.2, 136.2, 136.2, 131.0, 129.9, 128.8, 127.8, 127.6, 126.6, 125.7, 43.9, 19.8.

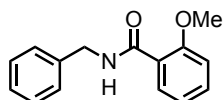

### *N*-benzyl-2-methoxybenzamide (**3c**)<sup>2</sup>

Substrate **3c** was obtained as white powder (34.3 mg, 71%); <sup>1</sup>H NMR (400 MHz, CDCl<sub>3</sub>) δ 8.30 – 8.22 (m, 1H), 8.19 (s, 1H), 7.45 (t, *J* = 7.8 Hz, 1H), 7.41 – 7.23 (m, 5H), 7.09 (t, *J* = 7.6 Hz, 1H), 6.96 (d, *J* = 8.3 Hz, 1H), 4.69 (d, *J* = 5.7 Hz, 2H), 3.91 (s, 3H); <sup>13</sup>C NMR (100 MHz, CDCl<sub>3</sub>) δ 165.3, 157.5, 138.8, 132.8, 132.4, 128.6, 127.5, 127.2, 121.4, 121.2, 111.3, 55.9, 43.7.

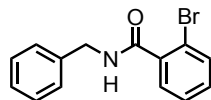

### *N*-benzyl-2-bromoxybenzamide (**3d**)<sup>3</sup>

Substrate **3d** was obtained as white powder (34.8 mg, 60%); <sup>1</sup>H NMR (400 MHz, CDCl<sub>3</sub>) δ 7.57 (td, *J* = 7.8, 7.7, 1.5 Hz, 2H), 7.43 – 7.24 (m, 7H), 6.25 (s, 1H), 4.66 (d, *J* = 5.6 Hz, 2H); <sup>13</sup>C NMR (100 MHz, CDCl<sub>3</sub>) δ 167.4, 137.6, 137.6, 133.4, 131.3, 129.6, 128.8, 128.0, 127.7, 127.6, 119.3, 44.3.

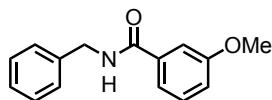

***N*-benzyl-3-methoxybenzamide (3e)<sup>4</sup>**

Substrate **3e** was obtained as white powder (41.0 mg, 85%); <sup>1</sup>H NMR (400 MHz, CDCl<sub>3</sub>) δ 7.40 – 7.35 (m, 1H), 7.33 – 7.19 (m, 7H), 7.03 (brs, 1H), 6.99 – 6.94 (m, 1H), 4.53 (d, *J* = 5.6 Hz, 2H), 3.74 (s, 3H); <sup>13</sup>C NMR (100 MHz, CDCl<sub>3</sub>) δ 167.2, 159.6, 138.2, 135.7, 129.3, 128.5, 127.6, 127.2, 118.8, 117.5, 112.3, 55.2, 43.8.

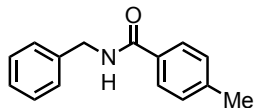

***N*-benzyl-4-methylbenzamide (3f)<sup>5</sup>**

Substrate **3f** was obtained as white powder (35.6 mg, 79%); <sup>1</sup>H NMR (400 MHz, CDCl<sub>3</sub>) δ 7.68 (d, *J* = 8.0 Hz, 2H), 7.39 – 7.24 (m, 5H), 7.21 (d, *J* = 7.9 Hz, 2H), 6.46 (s, 1H), 4.62 (d, *J* = 5.6 Hz, 2H), 2.38 (s, 3H); <sup>13</sup>C NMR (100 MHz, CDCl<sub>3</sub>) δ 167.3, 141.9, 138.3, 131.5, 129.2, 128.7, 127.9, 127.5, 126.9, 44.0, 21.4.

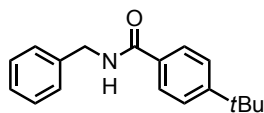

***N*-benzyl-4-(*tert*-butyl)benzamide (3g)<sup>6</sup>**

Substrate **3g** was obtained as white powder (41.7 mg, 78%); <sup>1</sup>H NMR (400 MHz, CDCl<sub>3</sub>) δ 7.73 (d, *J* = 8.3 Hz, 2H), 7.43 (d, *J* = 8.3 Hz, 2H), 7.39 – 7.24 (m, 5H), 6.50 (s, 1H), 4.63 (d, *J* = 5.7 Hz, 2H), 1.32 (s, 9H); <sup>13</sup>C NMR (100 MHz, CDCl<sub>3</sub>) δ 167.2, 155.0, 138.4, 131.5, 128.7, 127.8, 127.5, 126.8, 125.5, 44.0, 34.9, 31.1.

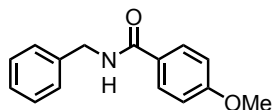

***N*-benzyl-4-methoxybenzamide (3h)<sup>1</sup>**

Substrate **3h** was obtained as white powder (40.5 mg, 84%); <sup>1</sup>H NMR (400 MHz, CDCl<sub>3</sub>) δ 7.76 (d, *J* = 8.7 Hz, 2H), 7.40 – 7.24 (m, 5H), 6.91 (d, *J* = 8.8 Hz, 2H), 6.37 (s, 1H), 4.62 (d, *J* = 5.7 Hz, 2H), 3.84 (s, 3H); <sup>13</sup>C NMR (100 MHz, CDCl<sub>3</sub>) δ 166.8, 162.2, 138.4, 128.7, 127.9, 127.5, 126.7, 113.7, 55.4, 44.1.

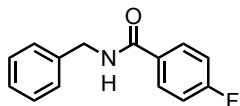

***N*-benzyl-4-fluorobenzamide (3i)<sup>7</sup>**

Substrate **3i** was obtained as white powder (34.3 mg, 75%); <sup>1</sup>H NMR (400 MHz, CDCl<sub>3</sub>) δ 7.88 – 7.74 (m, 2H), 7.40 – 7.24 (m, 5H), 7.17 – 6.99 (m, 2H), 6.41 (s, 1H), 4.62 (d, *J* = 5.7 Hz, 2H); <sup>13</sup>C NMR (100 MHz, CDCl<sub>3</sub>) δ 166.26, 164.7 (d, *J* = 252.0 Hz), 138.0, 130.5, 129.3 (d, *J* = 8.9 Hz), 128.8, 127.9, 127.7, 115.6 (d, *J* = 21.9 Hz), 44.2.

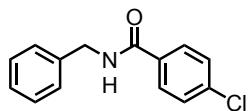

***N*-benzyl-4-chlorobenzamide (3j)<sup>7</sup>**

Substrate **3j** was obtained as white powder (37.8 mg, 77%);  $^1\text{H}$  NMR (400 MHz,  $\text{CDCl}_3$ )  $\delta$  7.72 (d,  $J = 8.6$  Hz, 2H), 7.39 (d,  $J = 8.6$  Hz, 2H), 7.37 – 7.27 (m, 5H), 6.42 (s, 1H), 4.62 (d,  $J = 5.6$  Hz, 2H);  $^{13}\text{C}$  NMR (100 MHz,  $\text{CDCl}_3$ )  $\delta$  166.2, 137.9, 137.8, 132.7, 128.8, 128.4, 127.9, 127.7, 44.2.

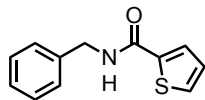

***N*-benzylthiophene-2-carboxamide (3k)<sup>8</sup>**

Substrate **3k** was obtained as white powder (34.8 mg, 80%);  $^1\text{H}$  NMR (400 MHz,  $\text{CDCl}_3$ )  $\delta$  7.51 (dd,  $J = 3.7, 1.1$  Hz, 1H), 7.47 (dd,  $J = 5.0, 1.1$  Hz, 1H), 7.38 – 7.26 (m, 5H), 7.08 – 7.03 (m, 1H), 6.39 (s, 1H), 4.61 (d,  $J = 5.8$  Hz, 2H);  $^{13}\text{C}$  NMR (100 MHz,  $\text{CDCl}_3$ )  $\delta$  161.8, 138.7, 138.0, 130.0, 128.7, 128.1, 127.9, 127.6, 126.6, 44.0.

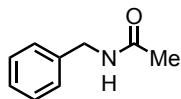

***N*-benzylacetamide (3l)<sup>9</sup>**

Substrate **3l** was obtained as white powder (7.5 mg, 25%);  $^1\text{H}$  NMR (400 MHz,  $\text{CDCl}_3$ )  $\delta$  7.41 – 7.23 (m, 5H), 5.82 (s, 1H), 4.42 (d,  $J = 5.7$  Hz, 2H), 2.02 (s, 3H);  $^{13}\text{C}$  NMR (100 MHz,  $\text{CDCl}_3$ )  $\delta$  169.8, 138.2, 128.7, 127.8, 127.5, 43.8, 23.3.

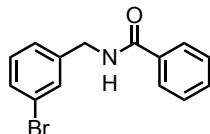

***N*-(3-bromobenzyl)benzamide (4a)<sup>10</sup>**

Substrate **4a** was obtained as white powder (43.5 mg, 75%);  $^1\text{H}$  NMR (400 MHz,  $\text{CDCl}_3$ )  $\delta$  7.83 – 7.74 (m, 2H), 7.55 – 7.45 (m, 2H), 7.45 – 7.36 (m, 3H), 7.31 – 7.23 (m, 1H), 7.19 (t,  $J = 7.7$  Hz, 1H), 6.63 (s, 1H), 4.59 (d,  $J = 5.7$  Hz, 2H);  $^{13}\text{C}$  NMR (100 MHz,  $\text{CDCl}_3$ )  $\delta$  167.4, 140.6, 134.1, 131.7, 130.7, 130.6, 130.3, 128.6, 127.0, 126.4, 122.7, 43.4.

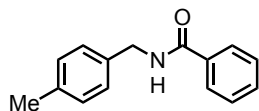

***N*-(4-methylbenzyl)benzamide (4b)<sup>8</sup>**

Substrate **4b** was obtained as white powder (40.6 mg, 90%);  $^1\text{H}$  NMR (400 MHz,  $\text{CDCl}_3$ )  $\delta$  7.83 – 7.74 (m, 2H), 7.52 – 7.45 (m, 1H), 7.42 – 7.38 (m, 2H), 7.27 – 7.21 (m, 2H), 7.15 (d,  $J = 7.8$  Hz, 2H), 6.45 (s, 1H), 4.59 (d,  $J = 5.5$  Hz, 2H), 2.34 (s, 3H);  $^{13}\text{C}$  NMR (100 MHz,  $\text{CDCl}_3$ )  $\delta$  167.3, 137.3, 135.1, 134.4, 131.4, 129.4, 128.5, 127.9, 126.9, 43.9, 21.1.

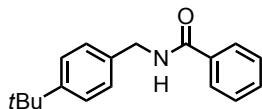

***N*-(4-(tert-butyl)benzyl)benzamide (4c)<sup>11</sup>**

Substrate **4c** was obtained as white powder (48.7 mg, 91%);  $^1\text{H}$  NMR (400 MHz,  $\text{CDCl}_3$ )  $\delta$  7.82 – 7.75 (m, 2H), 7.52 – 7.45 (m, 1H), 7.45 – 7.33 (m, 4H), 7.29 (d,  $J = 8.2$  Hz, 2H), 6.48 (s, 1H), 4.60 (d,  $J = 5.5$  Hz, 2H), 1.31 (s, 9H);  $^{13}\text{C}$  NMR (100 MHz,  $\text{CDCl}_3$ )  $\delta$  167.3, 150.6, 135.1, 134.5, 131.4, 128.5, 127.7, 126.9, 125.7, 43.8, 34.5, 31.3.

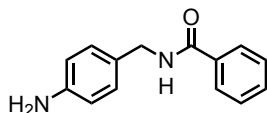

### ***N*-(4-aminobenzyl)benzamide (4d)<sup>12</sup>**

Substrate **4d** was obtained as gray powder (36.7 mg, 86%); <sup>1</sup>H NMR (400 MHz, CDCl<sub>3</sub>) δ 7.81 – 7.72 (m, 2H), 7.51 – 7.43 (m, 1H), 7.39 (t, *J* = 7.4 Hz, 2H), 7.13 (d, *J* = 8.3 Hz, 2H), 6.64 (d, *J* = 8.4 Hz, 2H), 6.40 (s, 1H), 4.50 (d, *J* = 5.4 Hz, 2H), 3.57 (s, 2H); <sup>13</sup>C NMR (100 MHz, CDCl<sub>3</sub>) δ 167.2, 145.9, 134.5, 131.3, 129.2, 128.5, 127.9, 126.9, 115.2, 43.8.

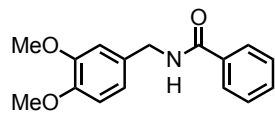

### ***N*-(3,4-dimethoxybenzyl)benzamide (4e)**

Substrate **4e** was obtained as white powder (44.0 mg, 81%); <sup>1</sup>H NMR (400 MHz, CDCl<sub>3</sub>) δ 7.80 (d, *J* = 7.4 Hz, 2H), 7.50 – 7.40 (m, 1H), 7.40 – 7.31 (m, 2H), 7.03 (s, 1H), 6.84 (d, *J* = 6.1 Hz, 2H), 6.76 (dd, *J* = 8.6, 1.9 Hz, 1H), 4.51 (d, *J* = 5.6 Hz, 2H), 3.80 (s, 3H), 3.78 (s, 3H); <sup>13</sup>C NMR (100 MHz, CDCl<sub>3</sub>) δ 167.2, 148.9, 148.2, 134.2, 131.2, 130.8, 128.3, 126.8, 119.9, 111.1, 111.1, 55.7, 55.6, 43.6; HRMS *m/z* (ESI) calcd for C<sub>16</sub>H<sub>18</sub>NO<sub>3</sub> (M + H)<sup>+</sup> 272.1281, found 272.1286.

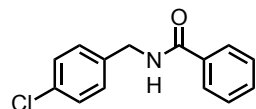

### ***N*-(4-chlorobenzyl)benzamide (4f)<sup>8</sup>**

Substrate **4f** was obtained as white powder (39.3 mg, 80%); <sup>1</sup>H NMR (400 MHz, CDCl<sub>3</sub>) δ 7.78 (d, *J* = 7.6 Hz, 2H), 7.50 (t, *J* = 7.4 Hz, 1H), 7.41 (t, *J* = 7.7 Hz, 2H), 7.34 – 7.21 (m, 4H), 6.61 (s, 1H), 4.58 (d, *J* = 5.8 Hz, 2H); <sup>13</sup>C NMR (100 MHz, CDCl<sub>3</sub>) δ 167.4, 136.8, 134.1, 133.3, 131.6, 129.1, 128.8, 128.6, 126.9, 43.3.

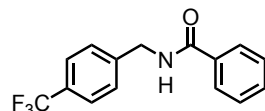

### ***N*-(4-trifluoromethylbenzyl)benzamide (4g)<sup>8</sup>**

Substrate **4g** was obtained as white powder (44.7 mg, 80%); <sup>1</sup>H NMR (400 MHz, CDCl<sub>3</sub>) δ 7.79 (d, *J* = 7.6 Hz, 2H), 7.58 (d, *J* = 7.9 Hz, 2H), 7.51 (t, *J* = 7.4 Hz, 1H), 7.48 – 7.39 (m, 4H), 6.67 (s, 1H), 4.68 (d, *J* = 5.6 Hz, 2H); <sup>13</sup>C NMR (100 MHz, CDCl<sub>3</sub>) δ 167.5, 142.4, 134.0, 131.8, 129.8 (q, *J* = 32.8, 32.0 Hz), 128.6, 127.9, 127.0, 125.6 (q, *J* = 3.6 Hz), 124.0 (q, *J* = 272.4 Hz), 43.5.

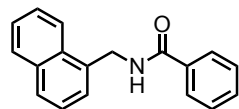

### ***N*-(naphthalen-1-ylmethyl)benzamide (4h)<sup>10</sup>**

Substrate **4h** was obtained as white powder (41.8 mg, 80%); <sup>1</sup>H NMR (400 MHz, CDCl<sub>3</sub>) δ 8.12 – 8.04 (m, 1H), 7.89 (dd, *J* = 8.0, 1.6 Hz, 1H), 7.87 – 7.82 (m, 1H), 7.80 – 7.71 (m, 2H), 7.58 – 7.34 (m, 7H), 6.37 (s, 1H), 5.09 (d, *J* = 5.2 Hz, 2H); <sup>13</sup>C NMR (100 MHz, CDCl<sub>3</sub>) δ 167.1, 134.3, 133.9, 133.4, 131.5, 131.5, 128.8, 128.8, 128.5, 126.9, 126.8, 126.0, 125.4, 123.5, 42.4.

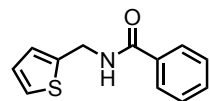

### ***N*-(thiophen-2-ylmethyl)benzamide (4i)<sup>8</sup>**

Substrate **4i** was obtained as white powder (26.1 mg, 60%); <sup>1</sup>H NMR (400 MHz, CDCl<sub>3</sub>) δ 7.81 – 7.73 (m, 2H), 7.50 – 7.42 (m, 1H), 7.41 – 7.33 (m, 2H), 7.20 (dd, *J* = 5.1, 1.2 Hz, 1H), 6.99 (dt, *J* = 3.2, 1.0, 1.0 Hz, 1H), 6.93 (dd, *J* = 5.1, 3.4 Hz, 1H), 6.85 (s, 1H), 4.76 (d, *J* = 5.6 Hz, 2H); <sup>13</sup>C NMR (100 MHz, CDCl<sub>3</sub>) δ 167.2, 140.8, 134.0, 131.5, 128.4, 127.0, 126.8, 126.0, 125.1, 38.7.

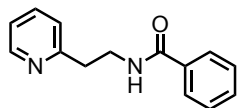

#### ***N*-(2-(pyridin-2-yl)ethyl)benzamide (4j)<sup>13</sup>**

Substrate **4j** was obtained as white powder (38.0 mg, 84%); <sup>1</sup>H NMR (400 MHz, CDCl<sub>3</sub>) δ 8.52 (d, *J* = 3.1 Hz, 1H), 7.78 (d, *J* = 7.2 Hz, 2H), 7.72 (s, 1H), 7.60 (td, *J* = 7.7, 7.6, 1.9 Hz, 1H), 7.44 (m, 1H), 7.38 (dd, *J* = 8.2, 6.5 Hz, 2H), 7.16 (m, 2H), 3.83 (q, *J* = 6.1, 6.1, 6.1 Hz, 2H), 3.08 (t, *J* = 6.3, 6.3 Hz, 3H); <sup>13</sup>C NMR (100 MHz, CDCl<sub>3</sub>) δ 167.2, 159.6, 148.9, 136.6, 134.5, 131.1, 128.3, 126.8, 123.4, 121.5, 39.2, 36.5.

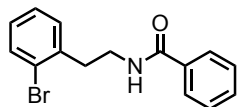

#### ***N*-(2-bromophenethyl)benzamide (4k)<sup>14</sup>**

Substrate **4k** was obtained as white powder (48.0 mg, 79%); <sup>1</sup>H NMR (400 MHz, CDCl<sub>3</sub>) δ 8.52 (d, *J* = 3.1 Hz, 1H), 7.78 (d, *J* = 7.2 Hz, 2H), 7.72 (s, 1H), 7.60 (td, *J* = 7.7, 7.6, 1.9 Hz, 1H), 7.49 – 7.41 (m, 1H), 7.38 (dd, *J* = 8.2, 6.5 Hz, 2H), 7.23 – 7.10 (m, 2H), 3.83 (q, *J* = 6.1, 6.1, 6.1 Hz, 2H), 3.08 (t, *J* = 6.3, 6.3 Hz, 3H); <sup>13</sup>C NMR (100 MHz, CDCl<sub>3</sub>) δ 167.6, 138.3, 134.5, 133.0, 131.4, 131.1, 128.5, 128.3, 127.7, 126.8, 124.6, 39.8, 35.7.

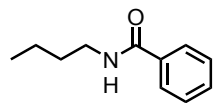

#### ***N*-butylbenzamide (4l)<sup>15</sup>**

Substrate **4l** was obtained as white powder (30.4 mg, 86%); <sup>1</sup>H NMR (400 MHz, CDCl<sub>3</sub>) δ 7.80 – 7.72 (m, 2H), 7.52 – 7.43 (m, 1H), 7.43 – 7.36 (m, 2H), 6.35 (s, 1H), 3.51 – 3.38 (m, 2H), 1.65 – 1.54 (m, 2H), 1.45 – 1.35 (m, 2H), 0.95 (t, *J* = 7.3 Hz, 3H); <sup>13</sup>C NMR (100 MHz, CDCl<sub>3</sub>) δ 167.5, 134.8, 131.2, 128.4, 126.8, 39.8, 31.7, 20.1, 13.7.

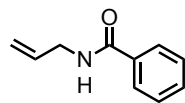

#### ***N*-allylbenzamide (4m)<sup>16</sup>**

Substrate **4m** was obtained as white powder (27.7 mg, 86%); <sup>1</sup>H NMR (400 MHz, CDCl<sub>3</sub>) δ 7.84 – 7.75 (m, 2H), 7.52 – 7.45 (m, 1H), 7.44 – 7.35 (m, 2H), 6.69 (s, 1H), 5.91 (ddt, *J* = 17.2, 10.2, 5.6, 5.6 Hz, 1H), 5.30 – 5.11 (m, 2H), 4.05 (tt, *J* = 5.7, 5.7, 1.6, 1.6 Hz, 2H); <sup>13</sup>C NMR (100 MHz, CDCl<sub>3</sub>) δ 167.4, 134.3, 134.1, 131.3, 128.4, 126.9, 116.4, 42.3.

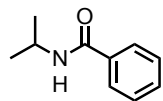

#### ***N*-isopropylbenzamide (4n)<sup>15</sup>**

Substrate **4n** was obtained as white powder (23.5 mg, 72%); <sup>1</sup>H NMR (400 MHz, CDCl<sub>3</sub>) δ 7.79 – 7.71 (m, 2H), 7.52 – 7.45 (m, 1H), 7.41 (t, *J* = 7.3 Hz, 2H), 5.95 (s, 1H), 4.42 – 4.20 (m, 1H), 1.26 (d, *J* = 6.6 Hz, 6H); <sup>13</sup>C NMR (100 MHz, CDCl<sub>3</sub>) δ 166.6, 135.0, 131.2, 128.5, 126.8, 41.9, 22.8.

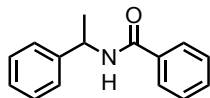

***N*-(1-phenylethyl)benzamide (4o)<sup>15</sup>**

Substrate **4o** was obtained as white powder (27.0 mg, 60%); <sup>1</sup>H NMR (400 MHz, CDCl<sub>3</sub>) δ 7.76 (d, *J* = 7.3 Hz, 2H), 7.48 (t, *J* = 7.3 Hz, 1H), 7.42 – 7.32 (m, 6H), 7.31 – 7.23 (m, 1H), 6.40 (s, 1H), 5.37 – 5.28 (m, 1H), 1.60 (d, *J* = 6.9 Hz, 3H); <sup>13</sup>C NMR (100 MHz, CDCl<sub>3</sub>) δ 166.5, 143.1, 134.6, 131.4, 128.7, 128.5, 127.4, 126.9, 126.2, 49.2, 21.7.

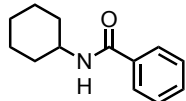

***N*-cyclohexylbenzamide (4p)<sup>15</sup>**

Substrate **4p** was obtained as white powder (28.9 mg, 71%); <sup>1</sup>H NMR (400 MHz, CDCl<sub>3</sub>) δ 7.75 (d, *J* = 7.8 Hz, 2H), 7.48 (t, *J* = 7.0 Hz, 1H), 7.42 (t, *J* = 7.5 Hz, 2H), 5.98 (s, 1H), 4.06 – 3.92 (m, 1H), 2.06 – 2.01 (m, 2H), 1.79 – 1.72 (m, 2H), 1.67 – 1.63 (m, 1H), 1.56 – 1.36 (m, 2H), 1.37 – 1.11 (m, 3H); <sup>13</sup>C NMR (100 MHz, CDCl<sub>3</sub>) δ 166.6, 135.1, 131.2, 128.5, 126.8, 48.6, 33.2, 25.6, 24.9.

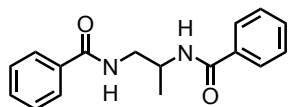

***N,N'*-(propane-1,2-diyl)dibenzamide (4q)<sup>17</sup>**

Substrate **4q** was obtained as white powder (31.1 mg, 55%); <sup>1</sup>H NMR (400 MHz, CDCl<sub>3</sub>) δ 7.84 – 7.76 (m, 4H), 7.52 – 7.44 (m, 2H), 7.44 – 7.32 (m, 5H), 7.12 (d, *J* = 7.3 Hz, 1H), 4.42 – 4.33 (m, 1H), 3.74 – 3.65 (m, 1H), 3.50 – 3.45 (m, 1H), 1.31 (d, *J* = 6.6 Hz, 3H); <sup>13</sup>C NMR (100 MHz, CDCl<sub>3</sub>) δ 168.8, 168.2, 134.0, 133.9, 131.6, 131.5, 128.5, 128.5, 127.01, 127.00, 47.2, 46.5, 18.4.

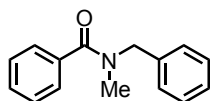

***N*-benzyl-*N*-methylbenzamide (4s)<sup>18</sup> (rotamer)**

Substrate **4s** was obtained as colorless oil (32.8 mg, 73%); <sup>1</sup>H NMR (400 MHz, CDCl<sub>3</sub>) δ 7.47 – 7.25 (m, 9H), 7.16 (s, 1H), 4.76 (s, 1H), 4.51 (s, 1H), 3.03 (s, 1.5H), 2.85 (s, 1.5H); <sup>13</sup>C NMR (100 MHz, CDCl<sub>3</sub>) δ 172.2, 171.5, 136.9, 136.5, 136.1, 132.7, 129.8, 129.5, 128.6, 128.3, 128.1, 128.1, 127.5, 126.9, 126.7, 55.1, 50.7, 36.9, 33.1.

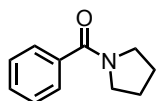

**phenyl(pyrrolidin-1-yl)methanone (4t)<sup>18</sup>**

Substrate **4t** was obtained as colorless oil (19.3 mg, 55%); <sup>1</sup>H NMR (400 MHz, CDCl<sub>3</sub>) δ 7.54 – 7.47 (m, 2H), 7.43 – 7.35 (m, 3H), 3.64 (t, 7.0 Hz, 2H), 3.42 (t, 6.6 Hz, 2H), 1.99 – 1.81 (m, 4H); <sup>13</sup>C NMR (100 MHz, CDCl<sub>3</sub>) δ 169.6, 137.1, 129.6, 128.1, 126.9, 49.4, 46.0, 26.2, 24.3.

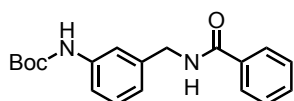



### **tert-butyl (3-(benzamidomethyl)phenyl)carbamate (5a)**

Substrate **5a** was obtained as white powder (56.1 mg, 86%); <sup>1</sup>H NMR (400 MHz, CDCl<sub>3</sub>) δ 7.83 – 7.76 (m, 2H), 7.52 – 7.46 (m, 1H), 7.45 – 7.36 (m, 3H), 7.27 (dd, *J* = 10.9, 4.9 Hz, 2H), 7.06 – 6.99 (m, 1H), 6.63 (s, 1H), 6.58 (s, 1H), 4.58 (d, *J* = 5.7 Hz, 2H), 1.50 (s, 9H); <sup>13</sup>C NMR (100 MHz, CDCl<sub>3</sub>) δ 167.36, 152.76, 139.13, 138.76, 134.29, 131.51, 129.37, 128.54, 126.98, 122.48, 117.97, 117.75, 80.60, 44.02, 28.29; HRMS *m/z* (ESI) calcd for C<sub>19</sub>H<sub>23</sub>N<sub>2</sub>O<sub>3</sub> (M + H)<sup>+</sup> 327.1703, found 327.1709.

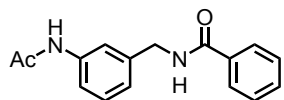

### **N-(3-acetamidobenzyl)benzamide (5b)**

Substrate **5b** was obtained as white powder (45.5 mg, 84%); <sup>1</sup>H NMR (400 MHz, CDCl<sub>3</sub>) δ 8.23 (s, 1H), 7.82 – 7.74 (m, 2H), 7.51 – 7.32 (m, 5H), 7.23 – 7.14 (m, 1H), 7.08 – 6.96 (m, 2H), 4.48 (s, 2H), 2.05 (s, 3H); <sup>13</sup>C NMR (100 MHz, CDCl<sub>3</sub>) δ 169.2, 167.8, 138.9, 138.5, 134.0, 131.5, 129.1, 128.5, 127.0, 123.1, 119.2, 119.2, 43.7, 24.2; HRMS *m/z* (ESI) calcd for C<sub>16</sub>H<sub>17</sub>N<sub>2</sub>O<sub>2</sub> (M + H)<sup>+</sup> 269.1285, found 269.1289.

### **Reference:**

- (1) B. Roberts, D. Liptrot, L. Alcaraz, T. Luker and M. J. Stocks, *Org. Lett.*, 2010, **12**, 4280-4283.
- (2) J. R. Martinelli, D. A. Watson, D. M. M. Freckmann, T. E. Barder and S. L. Buchwald, *J. Org. Chem.*, 2008, **73**, 7102-7107.
- (3) P. Thansandote, D. G. Hulcoop, M. Langer and M. Lautens, *J. Org. Chem.*, 2009, **74**, 1673-1678
- (4) W. Ren and M. Yamane, *J. Org. Chem.*, 2010, **75**, 3017-3020.
- (5) Y. Q. Wan, M. Alterman, M. Larhed and A. Hallberg, *J. Org. Chem.*, 2002, **67**, 6232-6235.
- (6) N. Iqbal and E. J. Cho, *J. Org. Chem.*, 2016, **81**, 1905-1911.
- (7) R. A. Green, D. Pletcher, S. G. Leach and R. C. D. Brown, *Org. Lett.*, 2016, **18**, 1198-1201.
- (8) N. Wang, X. Zou, J. Ma and F. Li, *Chem. Commun.*, 2014, **50**, 8303-8305.
- (9) J. E. Taylor, M. D. Jones, J. M. J. Williams and S. D. Bull, *J. Org. Chem.*, 2012, **77**, 2808-2818.
- (10) S. Kerdphon, X. Quan, V. S. Parihar and P. G. Andersson, *J. Org. Chem.*, 2015, **80**, 11529-11537.
- (11) L. Rubio-Perez, P. Sharma, F. Javier Perez-Flores, L. Velasco, J. Luis Arias and A. Cabrera, *Tetrahedron*, 2012, **68**, 2342-2348.
- (12) C. Baumgartner, C. Eberle, F. Diederich, S. Lauw, F. Rohdich, W. Eisenreich and A. Barber, *Helv. Chim. Acta*, 2007, **90**, 1043-1068.
- (13) S. Inoue, H. Shiota, Y. Fukumoto and N. Chatani, *J. Am. Chem. Soc.*, 2009, **131**, 6898-6899.
- (14) S. Balieu, K. Toutah, L. Carro, L.-M. Chamoreau, H. Rousseliere and C. Courillon, *Tetrahedron Lett.*, 2011, **52**, 2876-2880.
- (15) X. Bantreil, N. Kanfar, N. Gehin, E. Golliard, P. Ohlmann, J. Martinez and F. Lamaty, *Tetrahedron*, 2014, **70**, 5093-5099.
- (16) D. S. Hemming, E. P. Talbot and P. G. Steel, *Tetrahedron Lett.*, 2017, **58**, 17-20.
- (17) R. Kuwano, N. Kameyama and R. Ikeda, *J. Am. Chem. Soc.*, 2011, **133**, 7312-7315.
- (18) Y. Liu, S. Shi, M. Achtenhagen, R. Liu and M. Szostak, *Org. Lett.*, 2017, **19**, 1614-1617.

### 3. <sup>1</sup>H and <sup>13</sup>C NMR Spectra

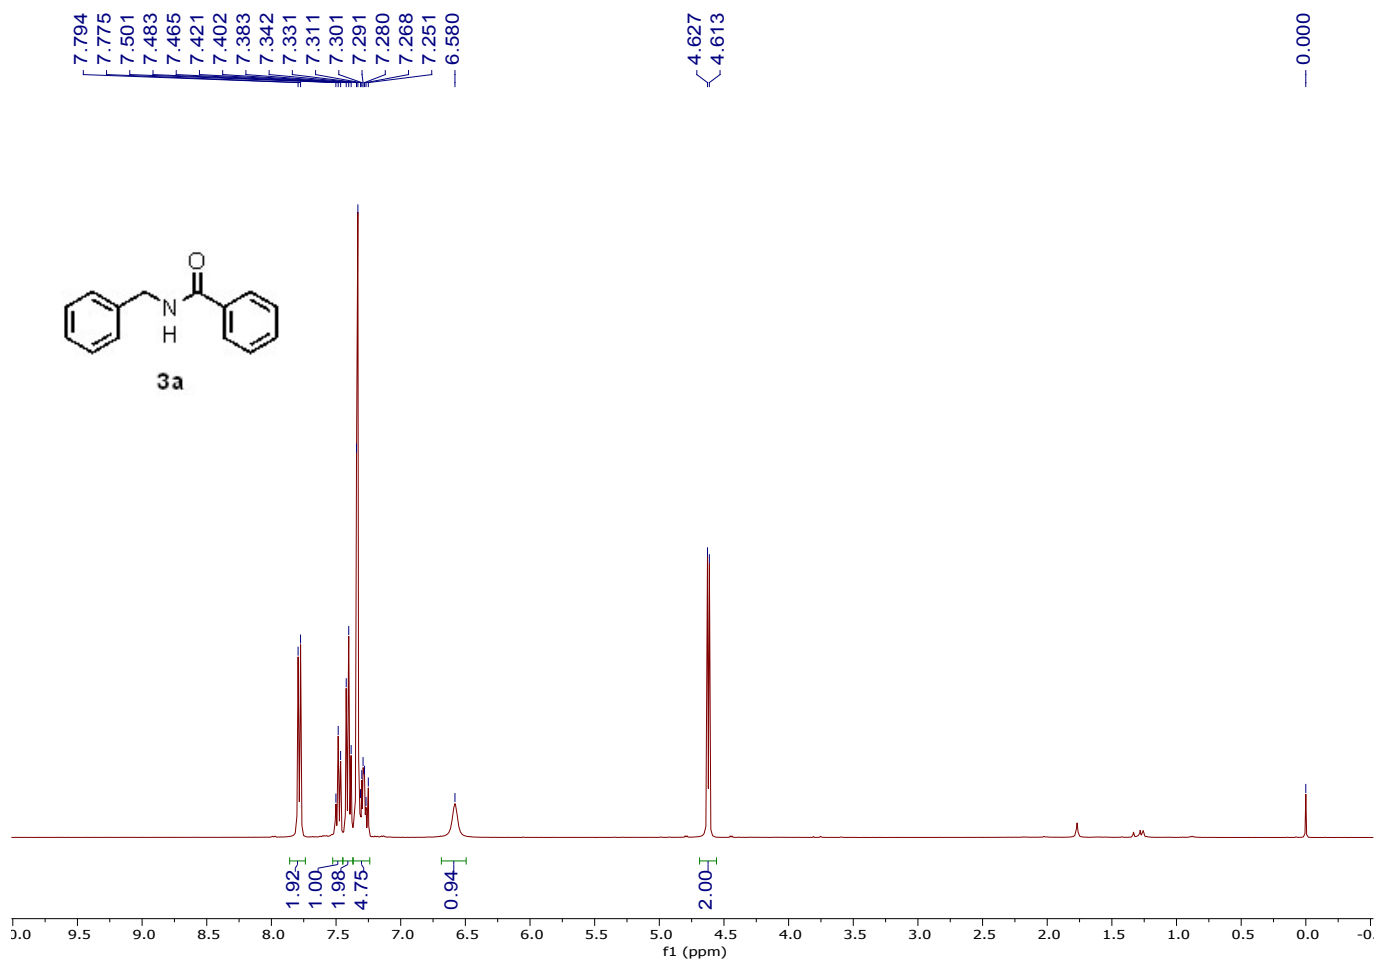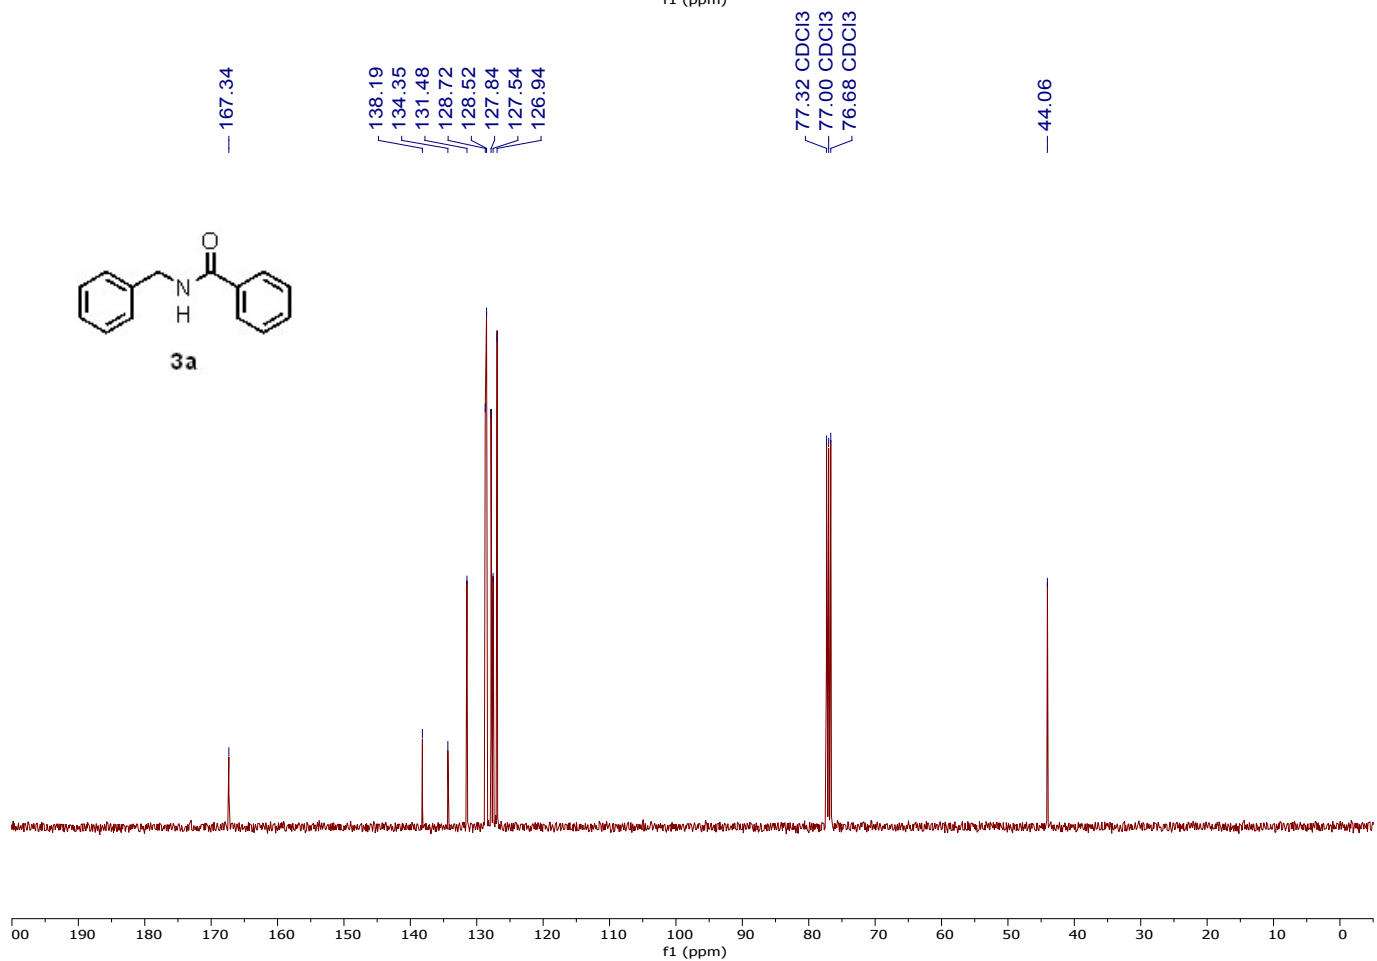

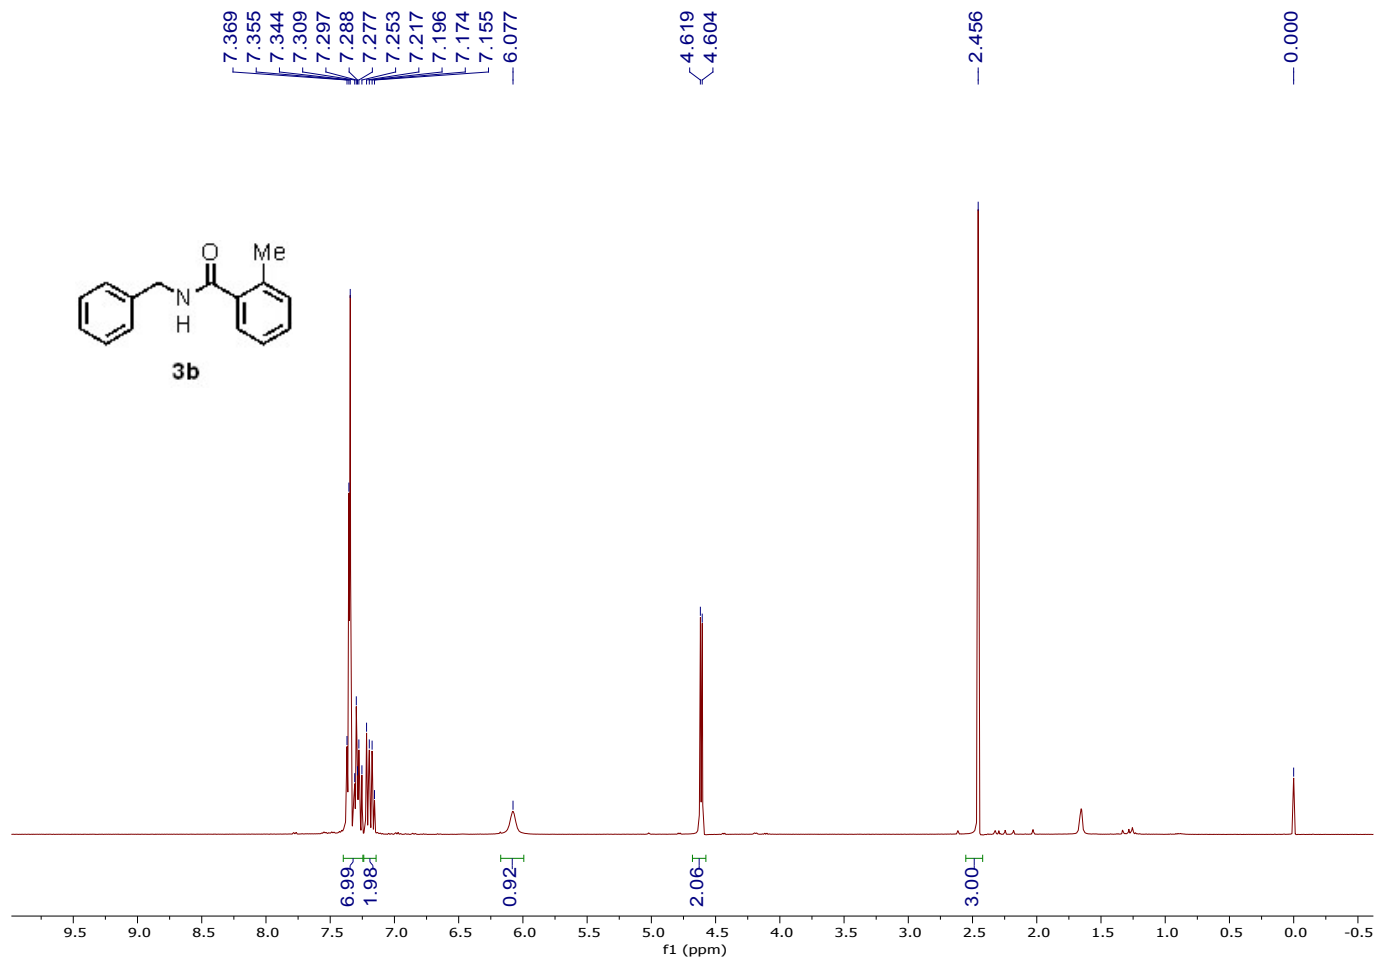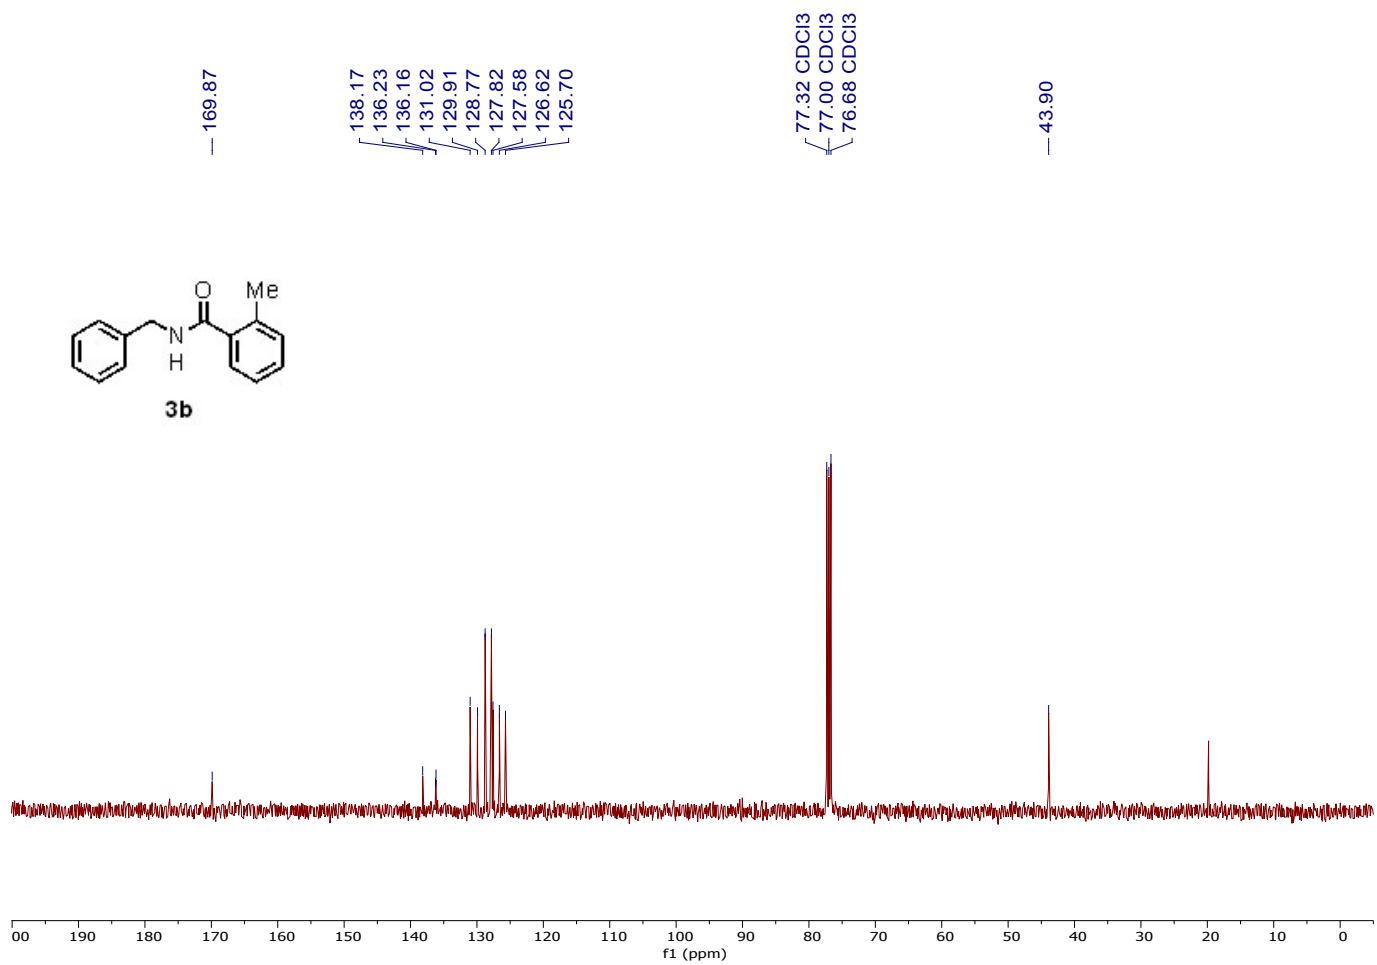

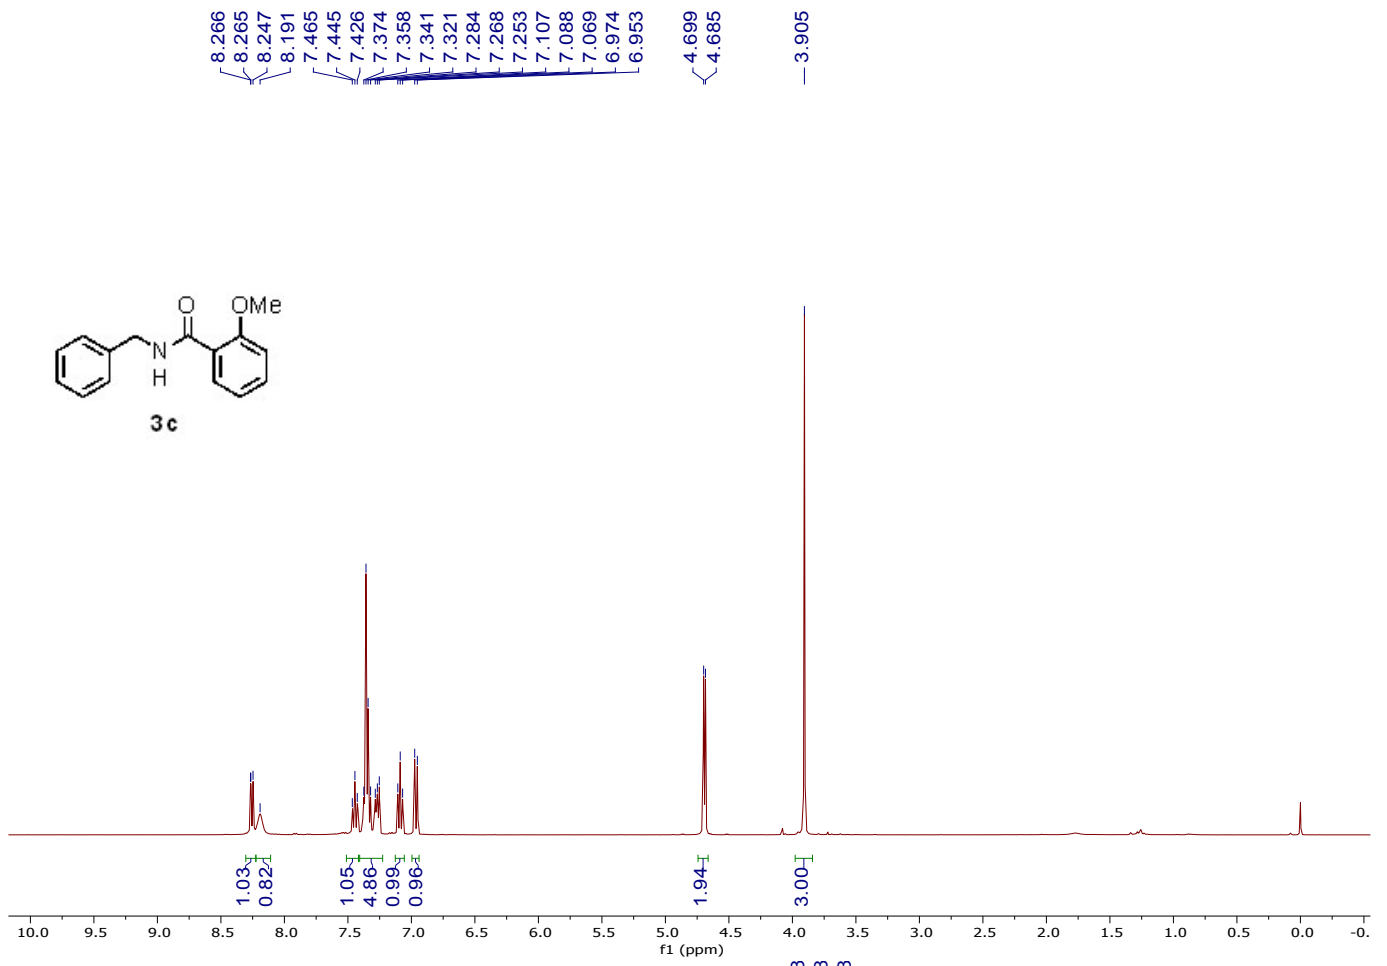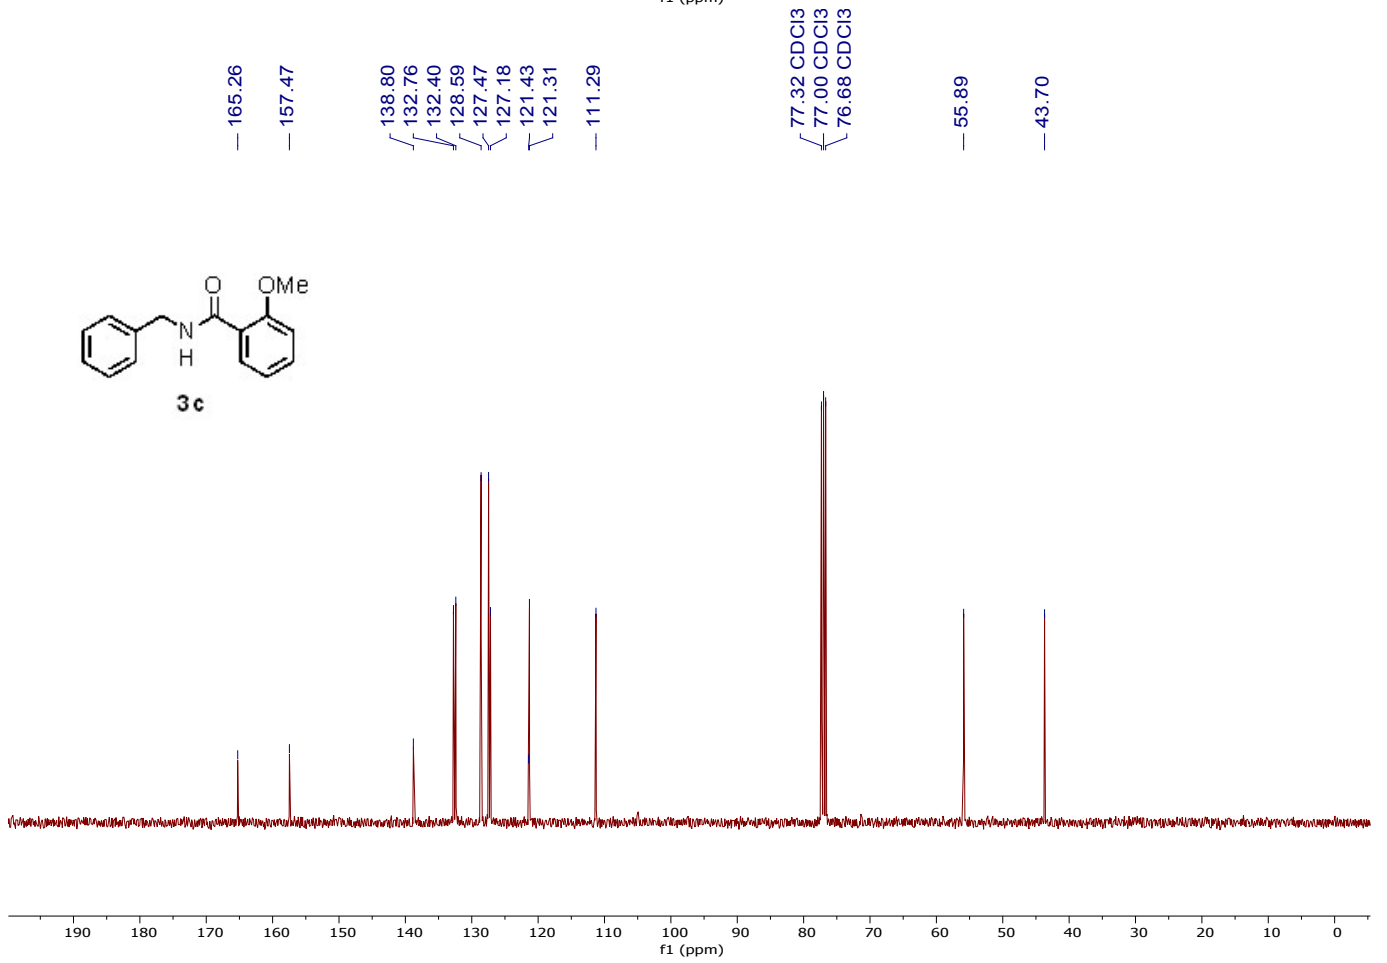

7.594  
7.591  
7.575  
7.571  
7.564  
7.556  
7.552  
7.408  
7.403  
7.398  
7.386  
7.382  
7.379  
7.377  
7.371  
7.362  
7.359  
7.355  
7.353  
7.345  
7.342  
7.340  
7.337  
7.334  
7.328  
7.320  
7.316  
7.311  
7.305  
7.300  
7.298  
7.288  
7.284  
7.281  
7.277  
7.269  
7.264  
7.259  
7.250  
7.245  
6.252  
4.667  
4.653

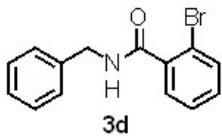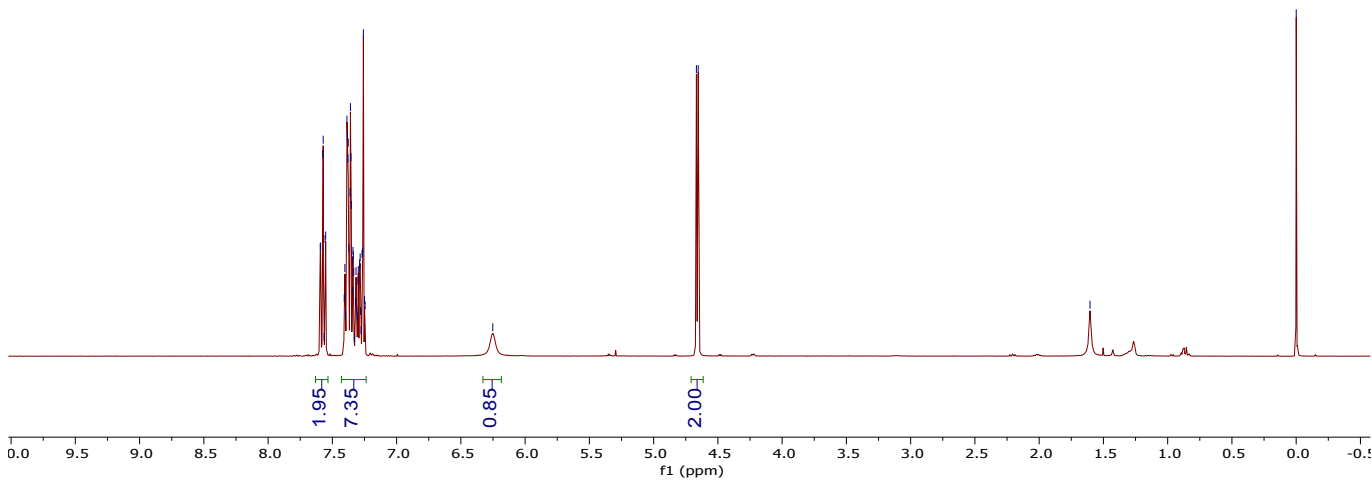

167.432  
137.644  
137.561  
133.390  
131.308  
129.640  
128.763  
128.001  
127.693  
127.554  
119.275  
77.317  
77.000  
76.682  
44.255

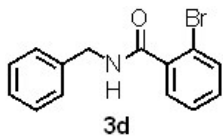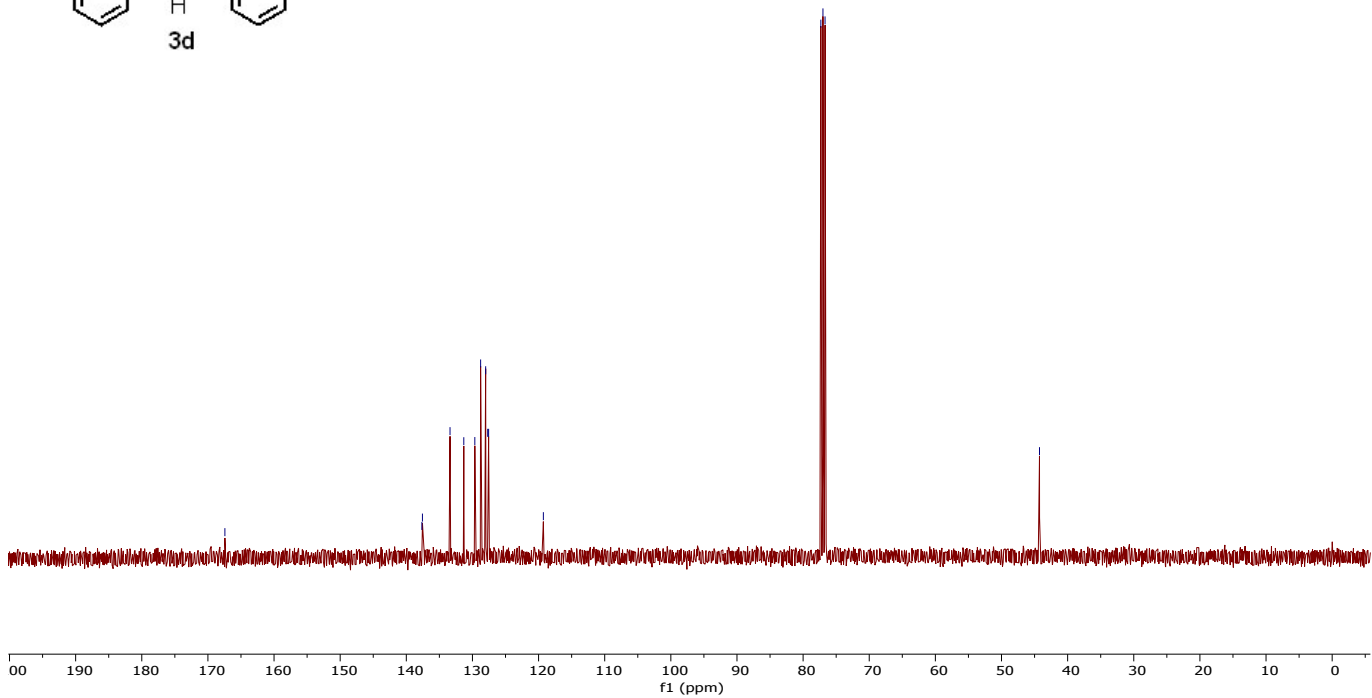

1.604

0.000

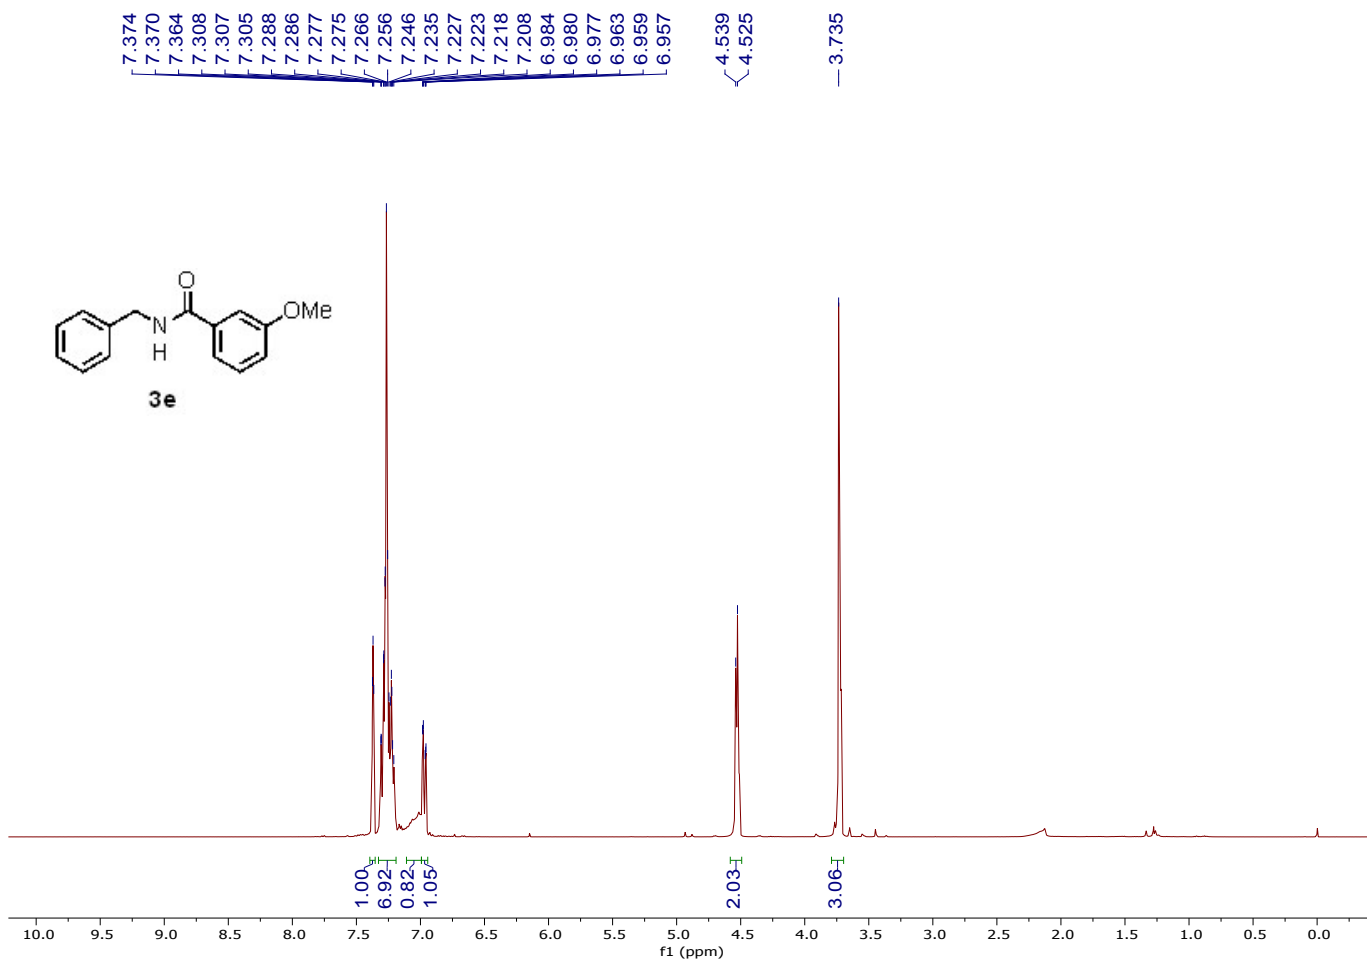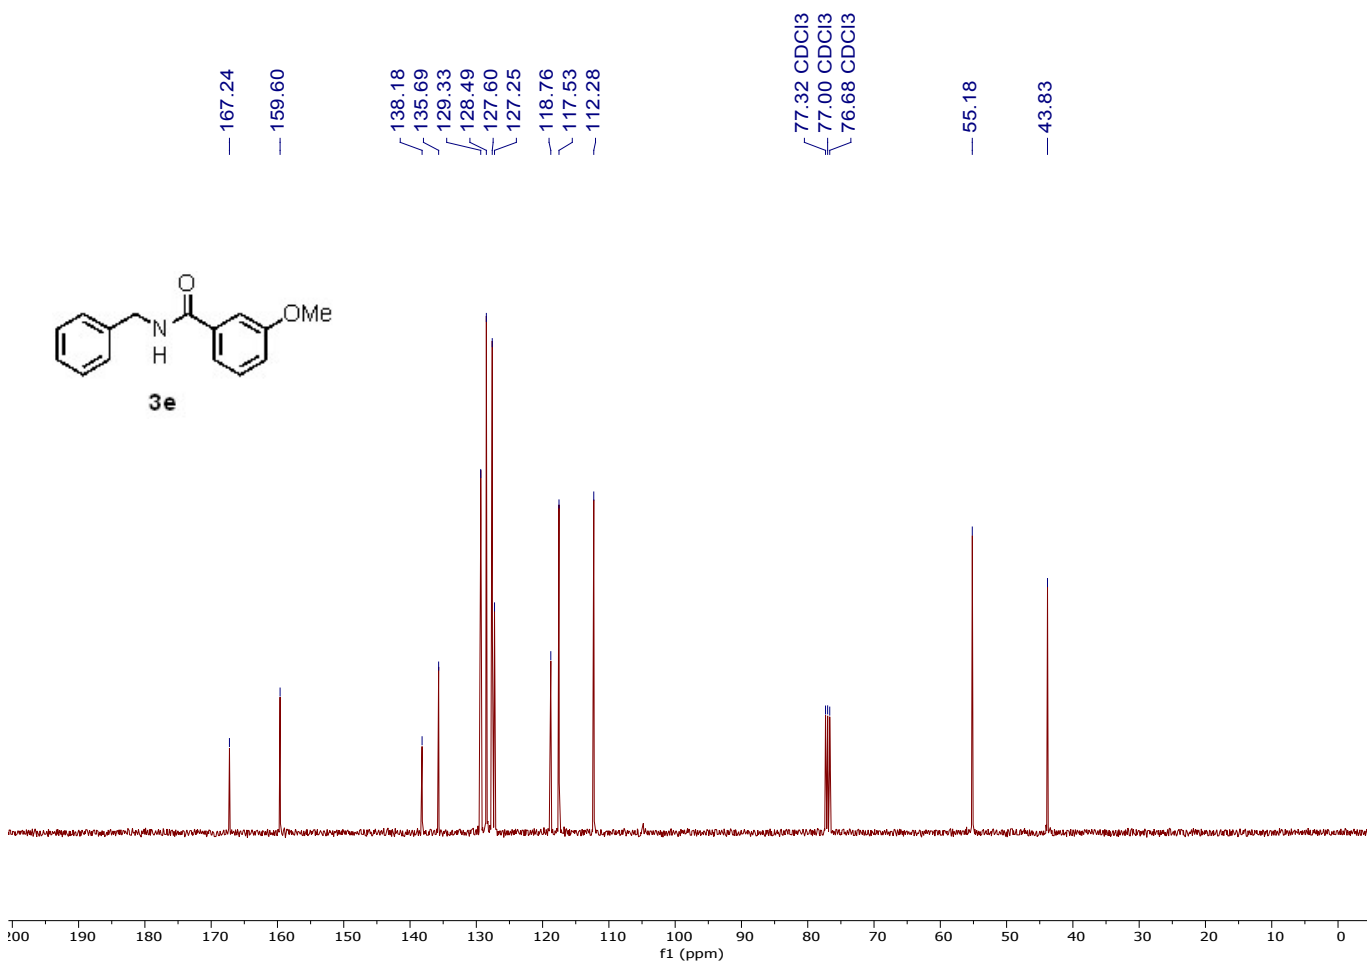

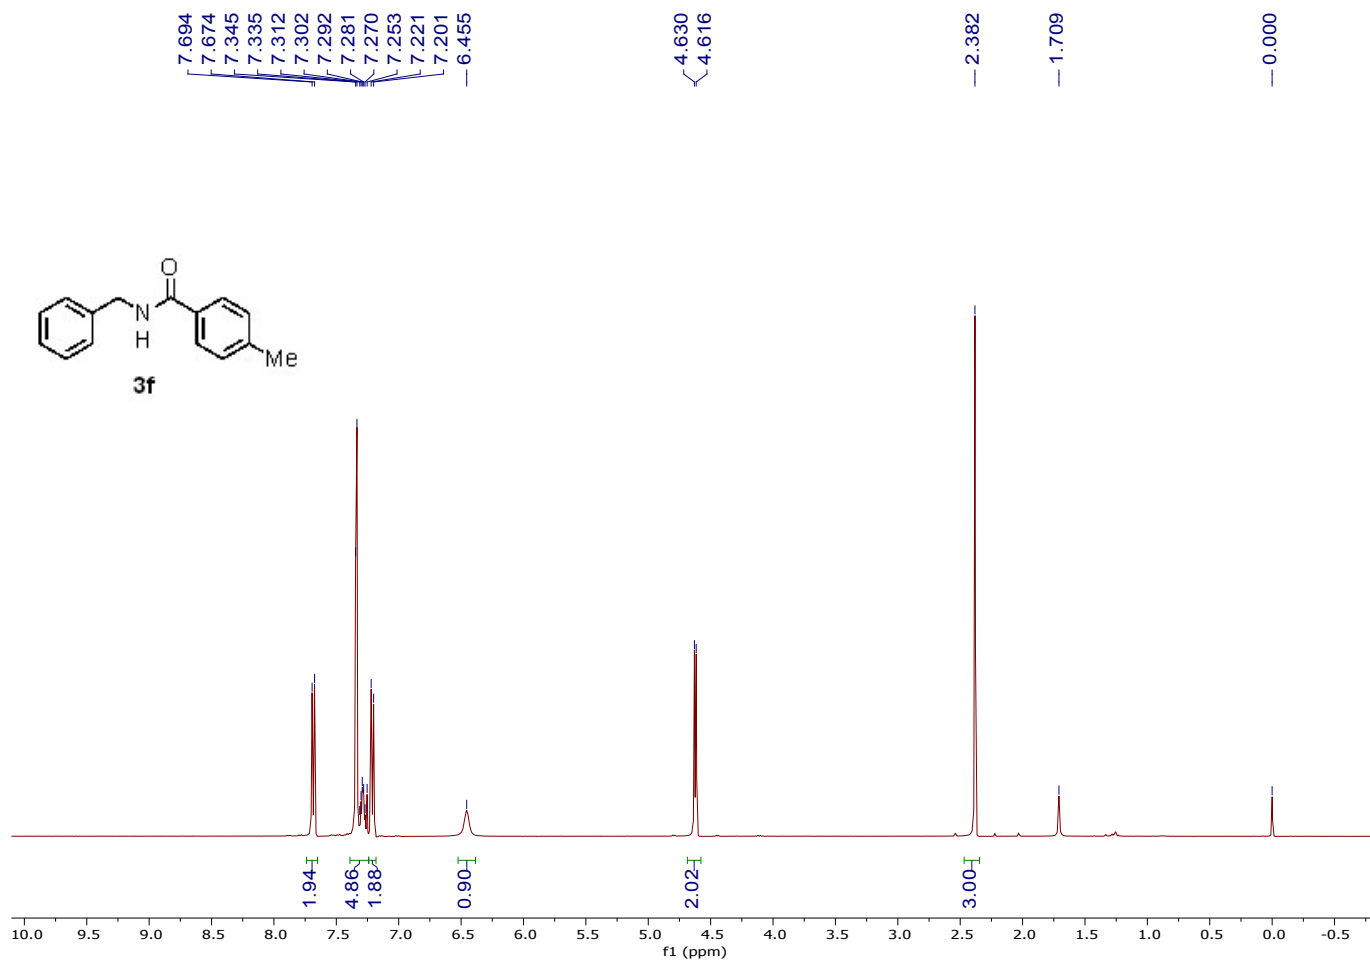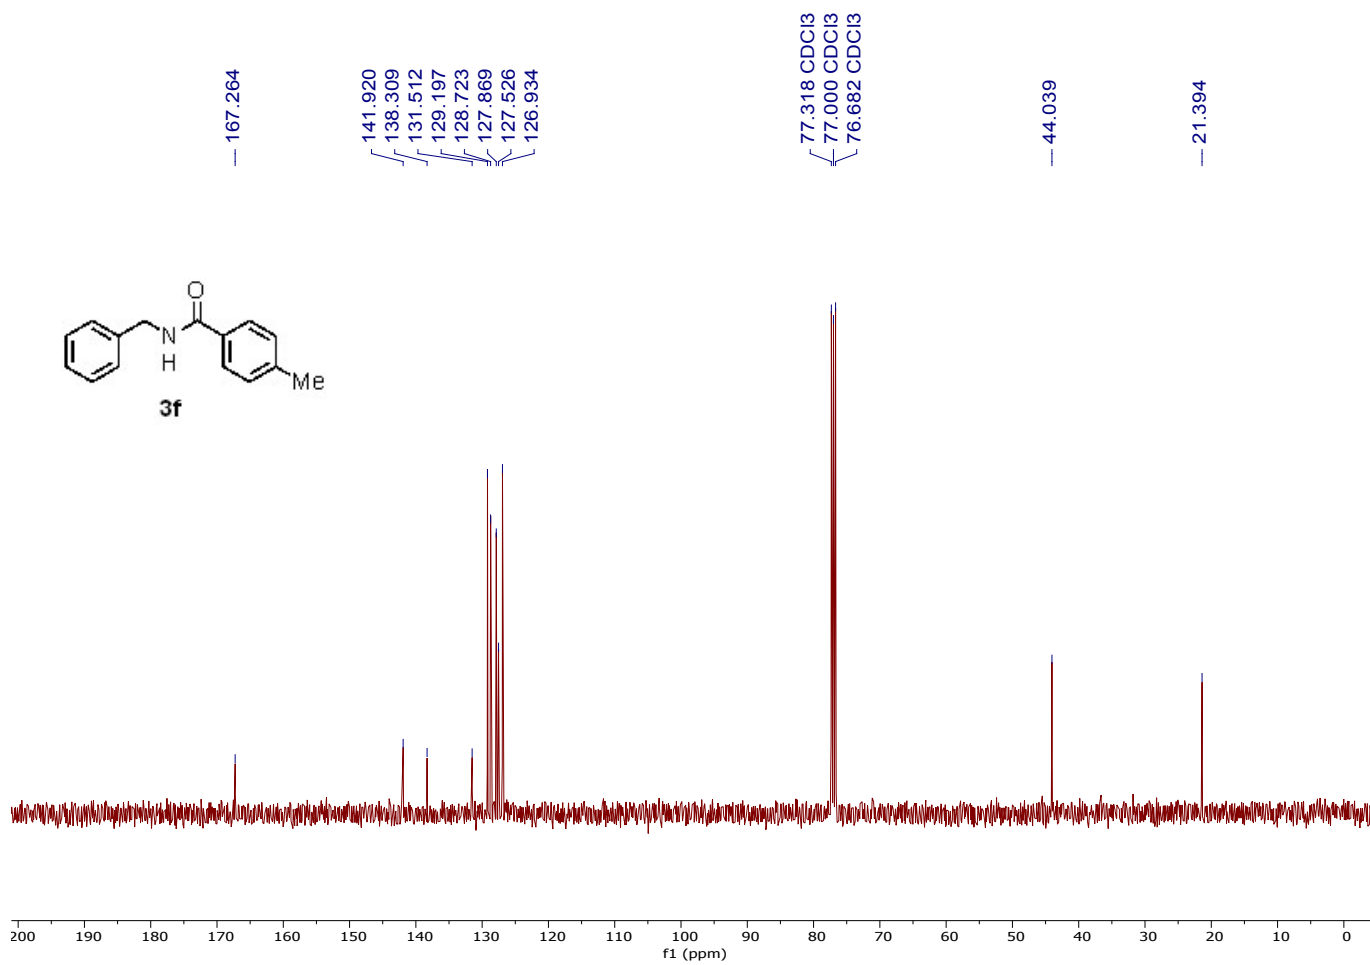

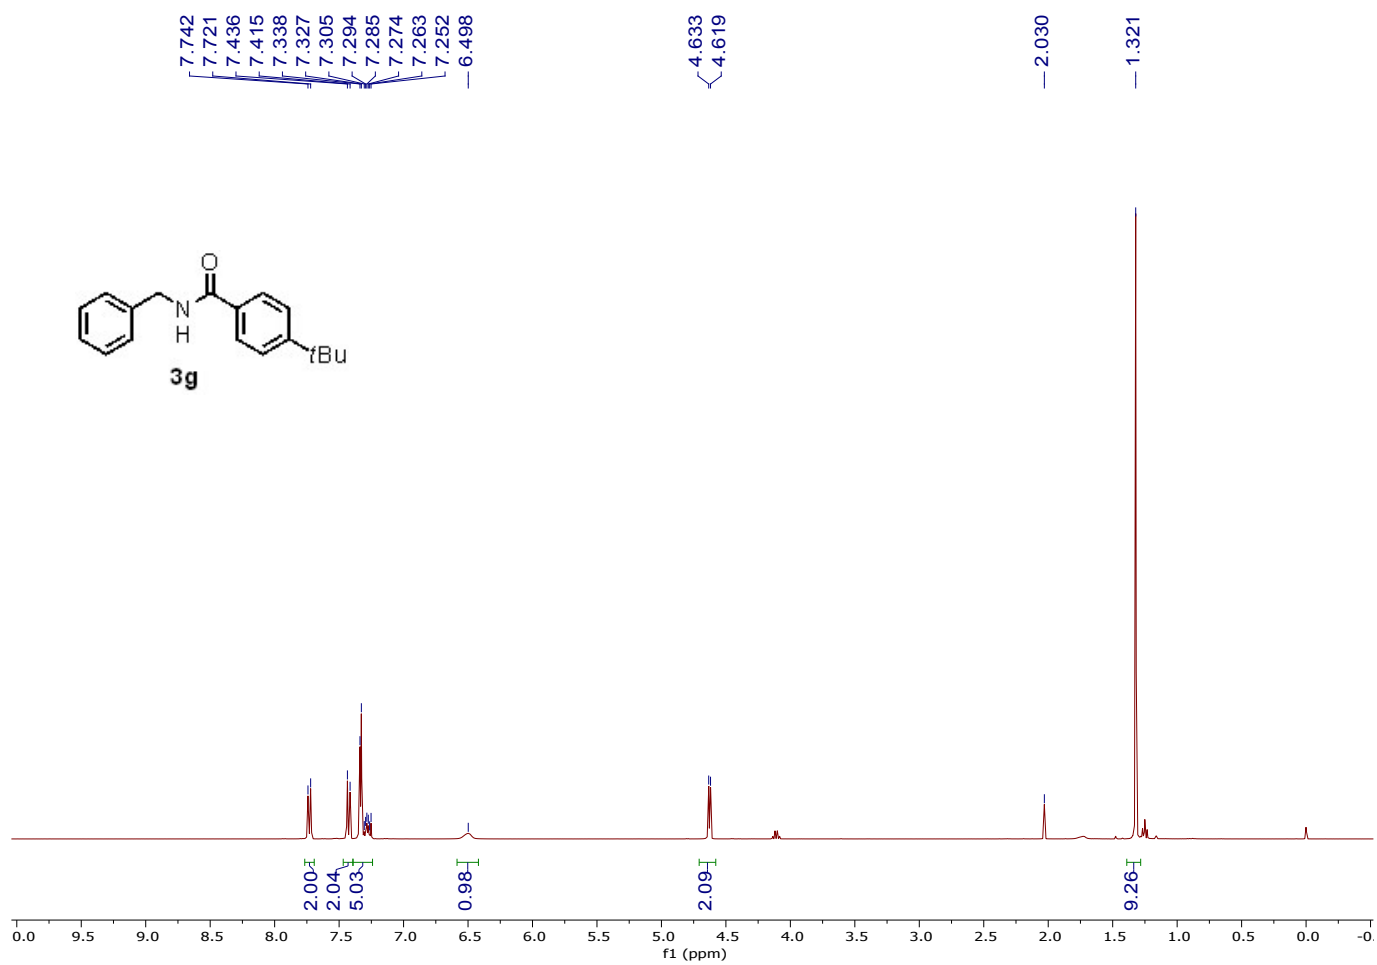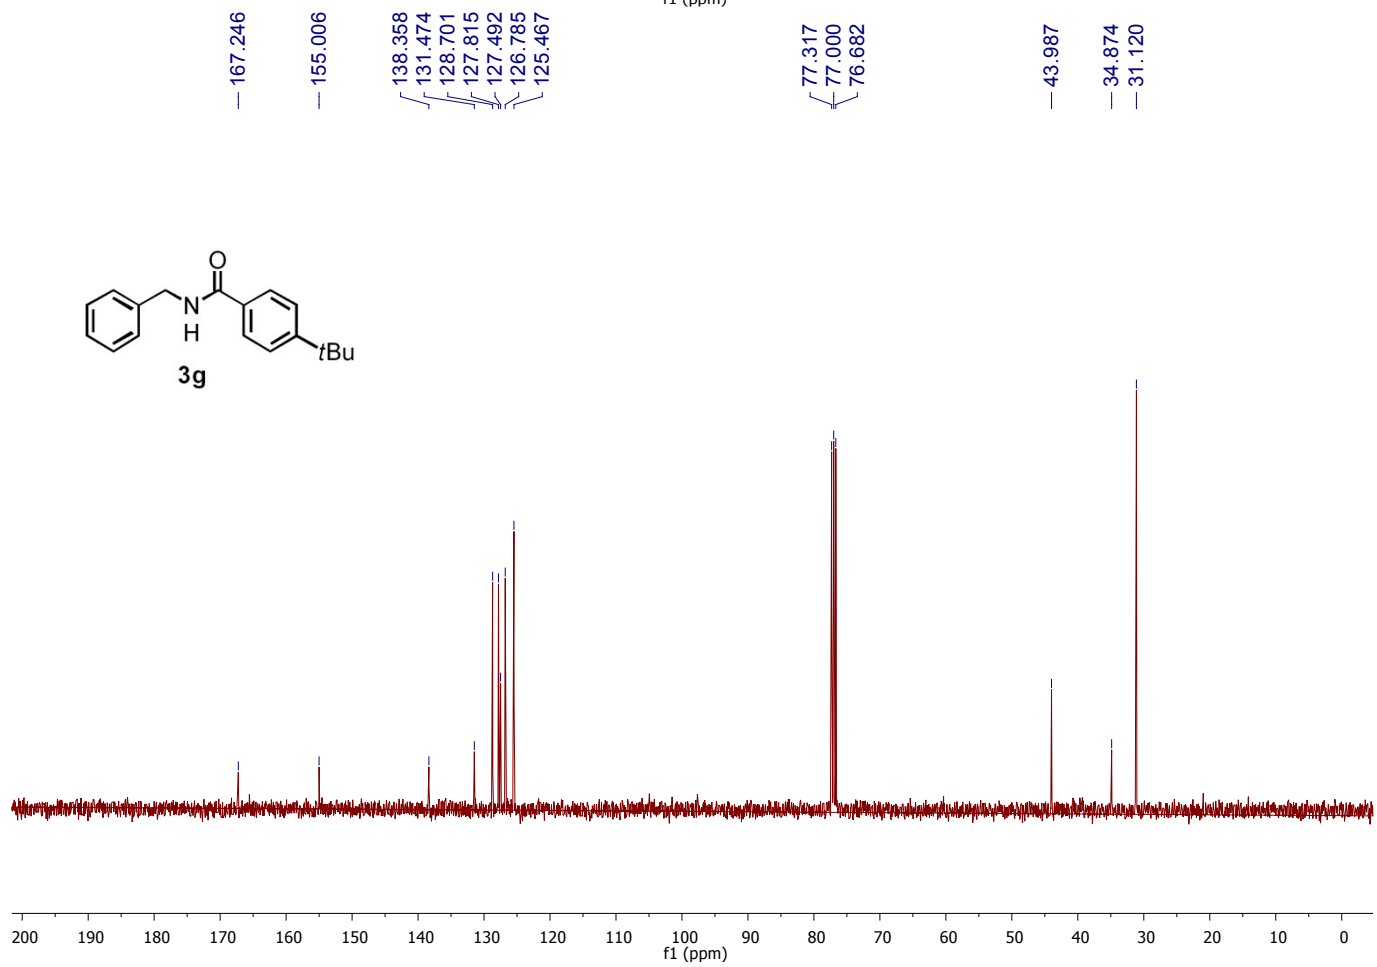



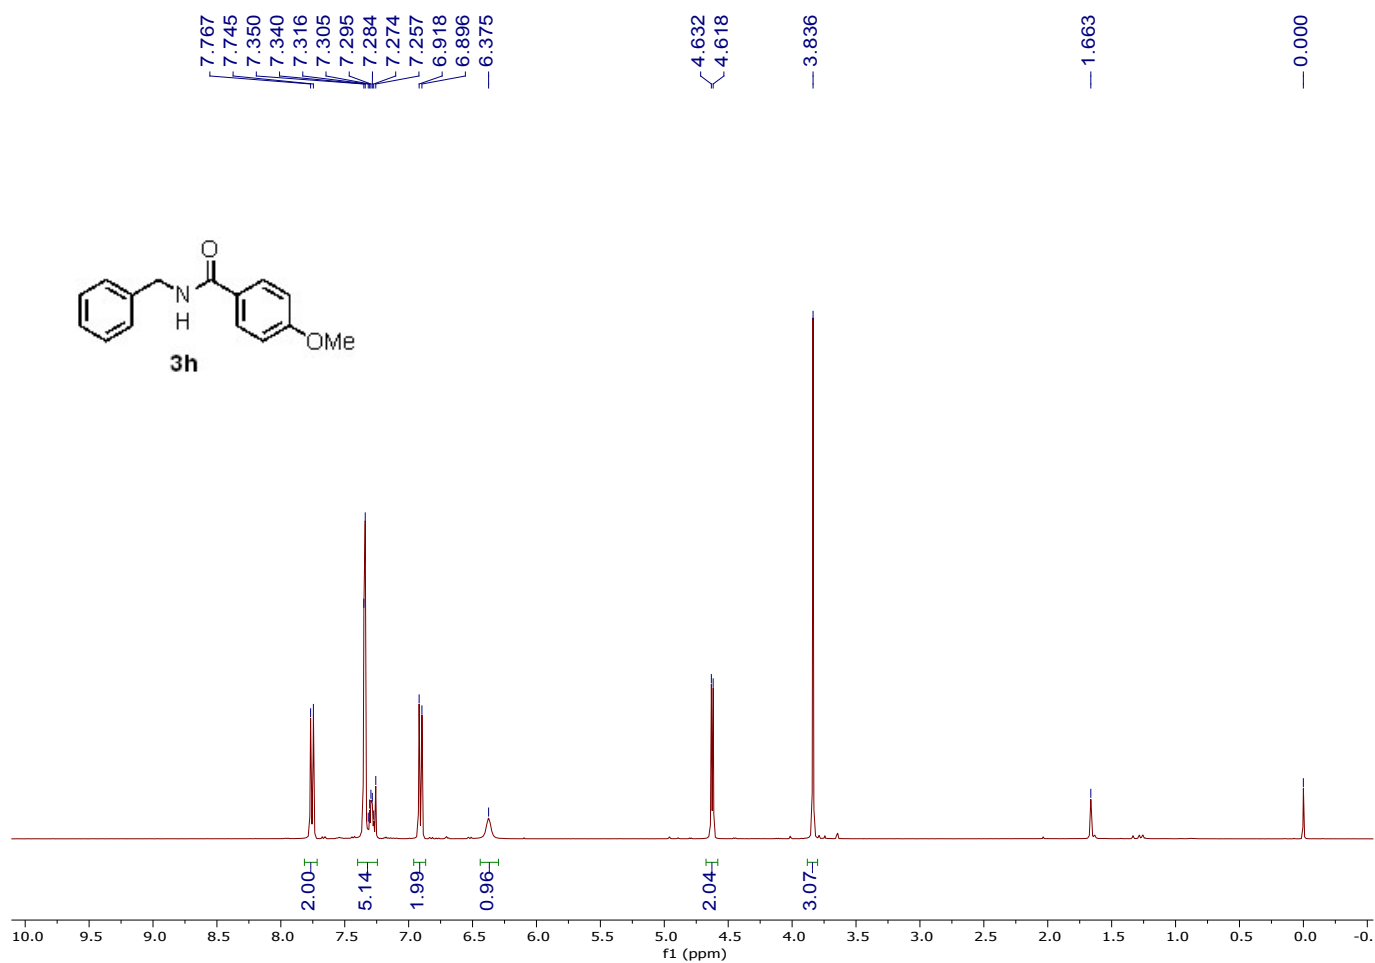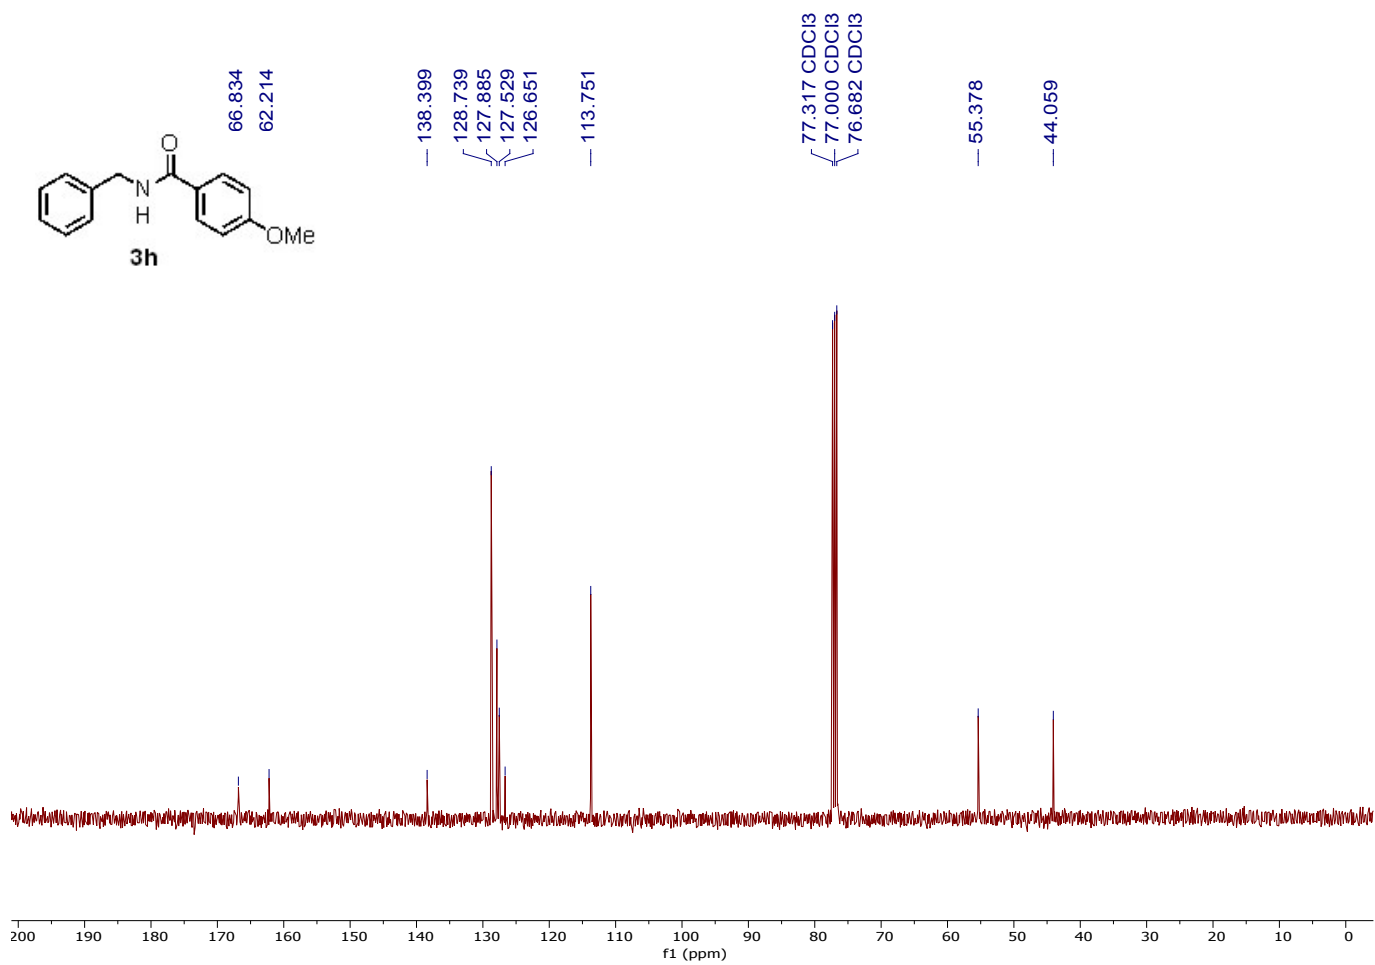

7.819  
7.812  
7.807  
7.799  
7.790  
7.782  
7.777  
7.770  
7.375  
7.370  
7.356  
7.353  
7.350  
7.342  
7.333  
7.329  
7.317  
7.310  
7.307  
7.295  
7.284  
7.274  
7.257  
7.119  
7.111  
7.106  
7.090  
7.073  
7.068  
7.061  
6.414  
4.631  
4.617

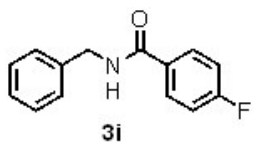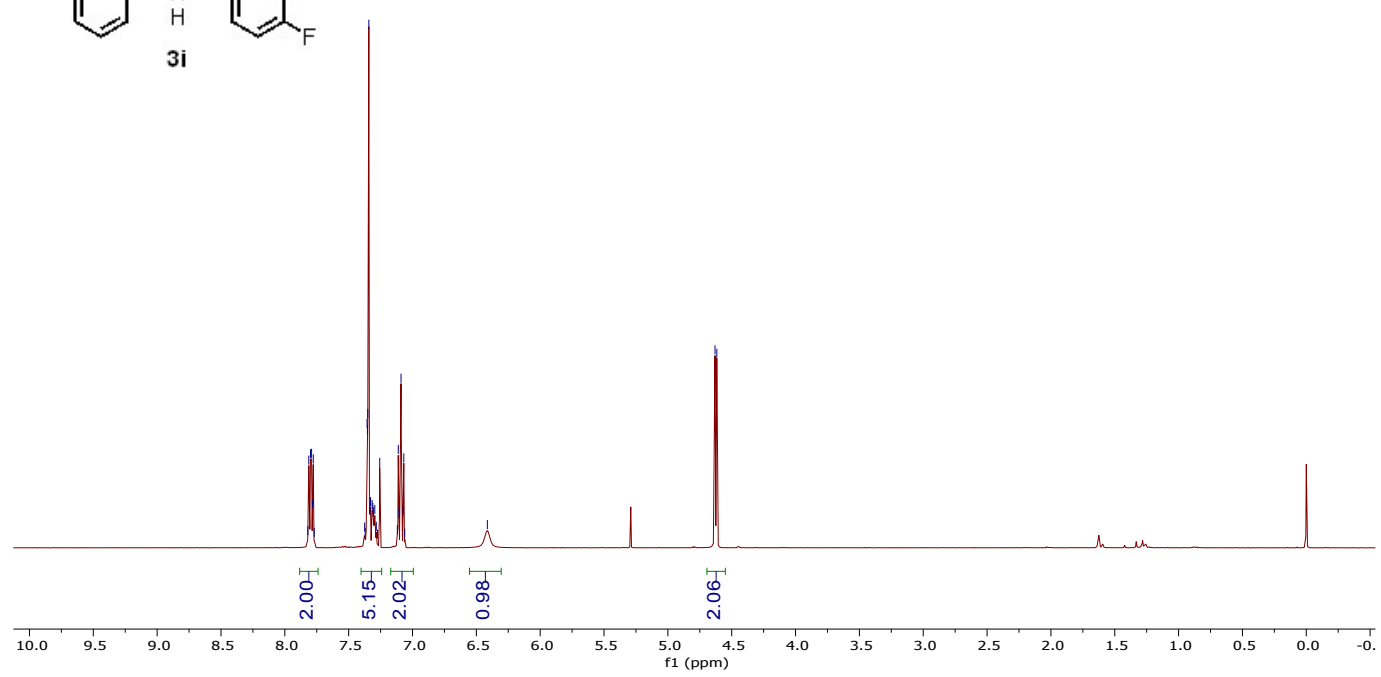

166.263  
165.996  
163.492  
138.041  
130.535  
129.315  
129.227  
128.807  
127.912  
127.685  
115.710  
115.493

44.205

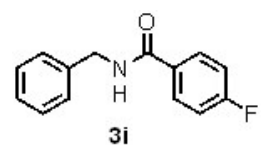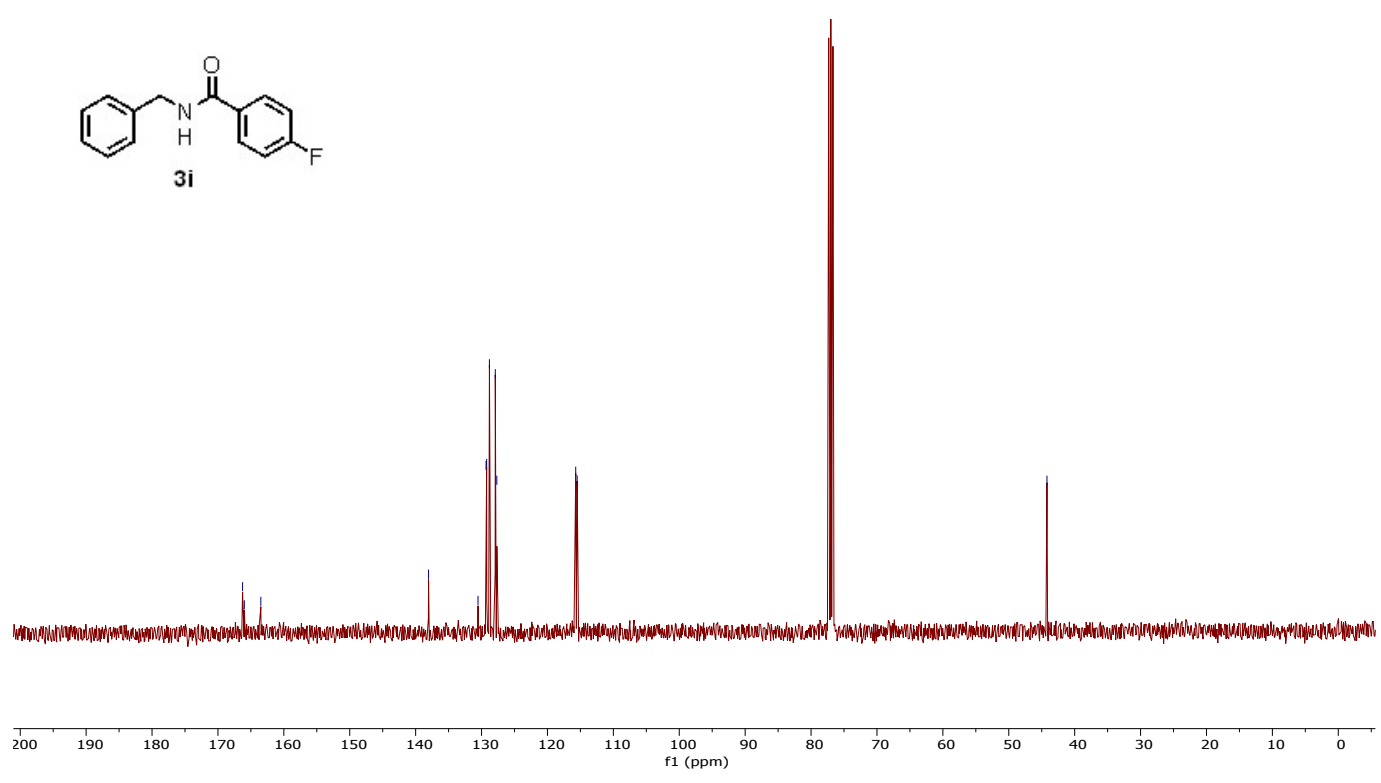

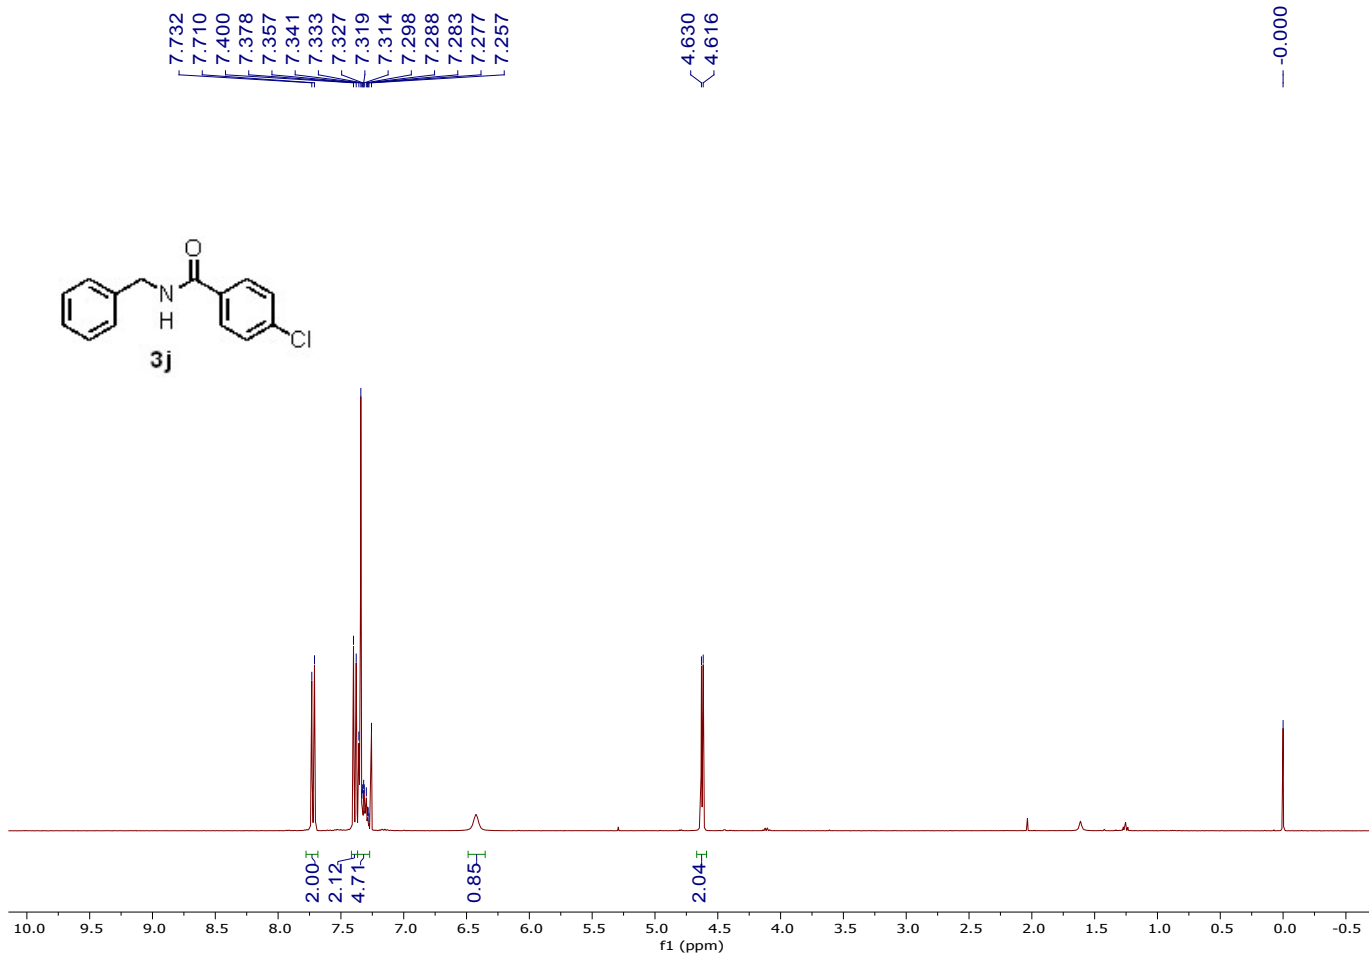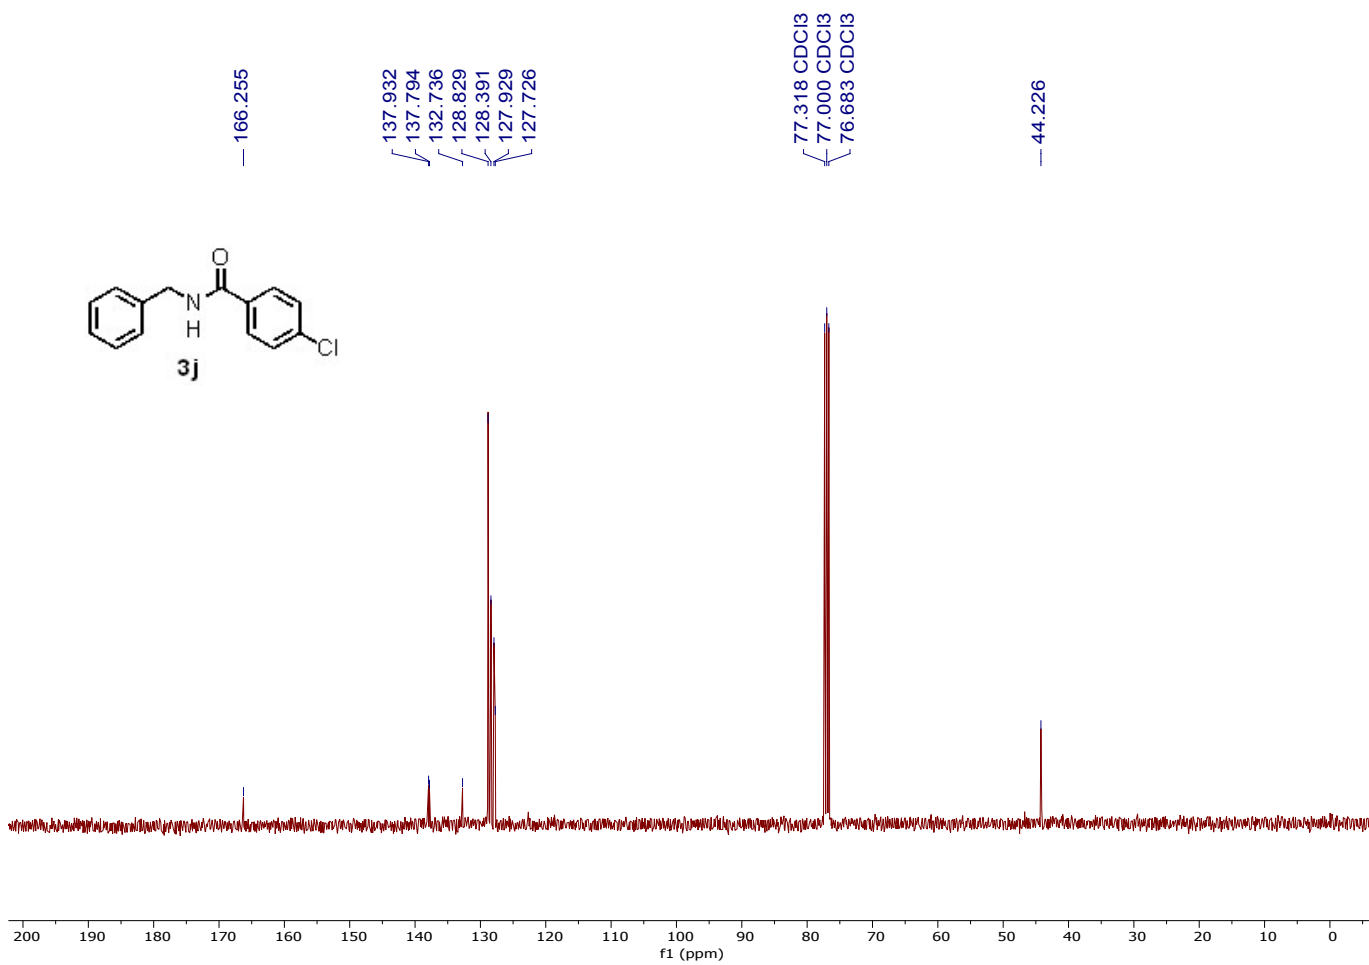

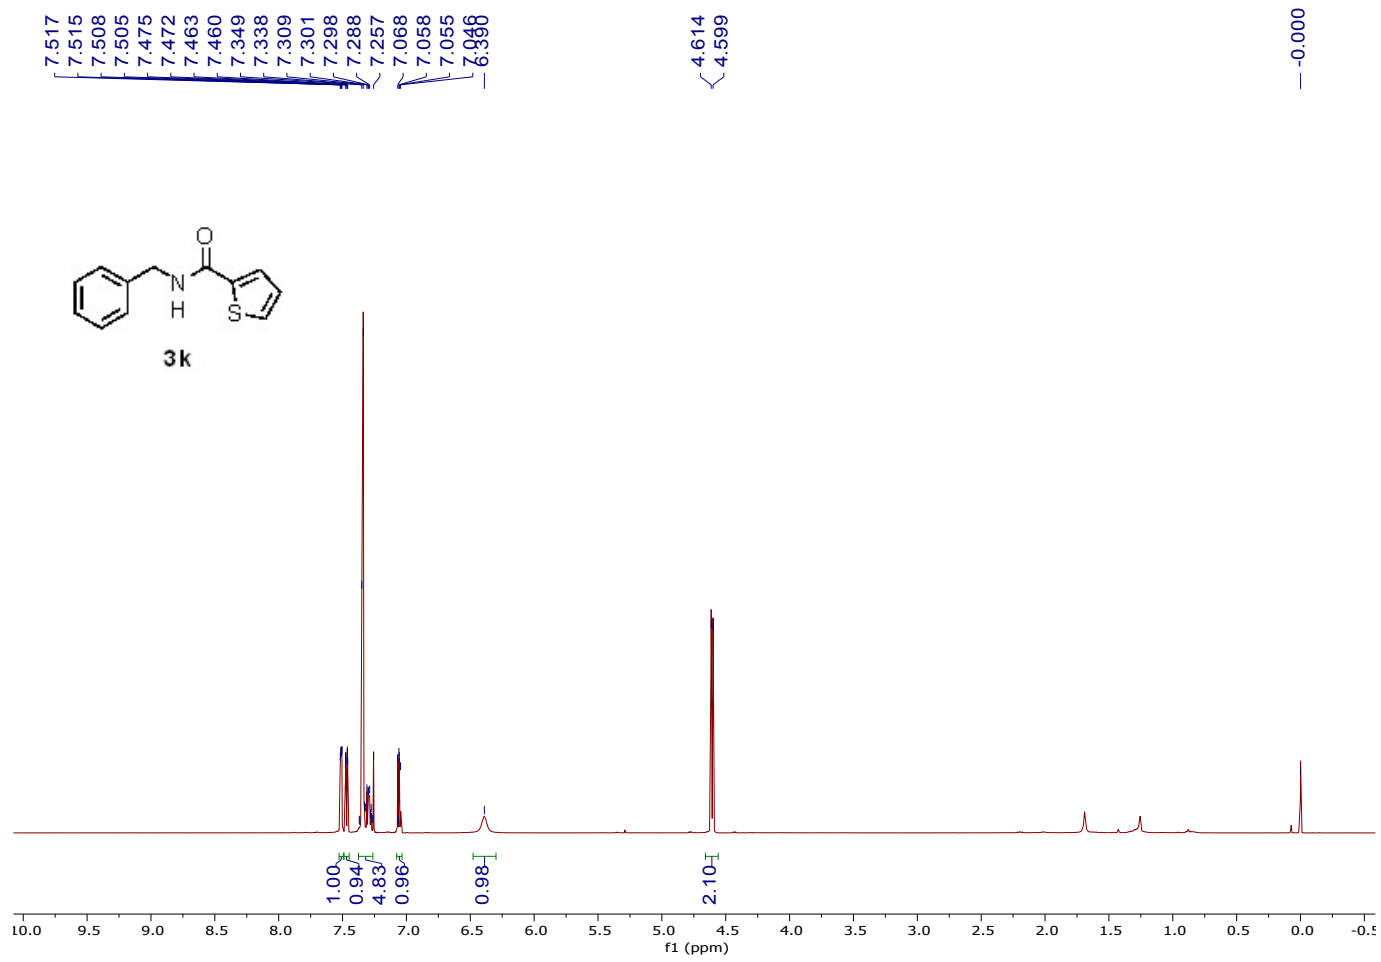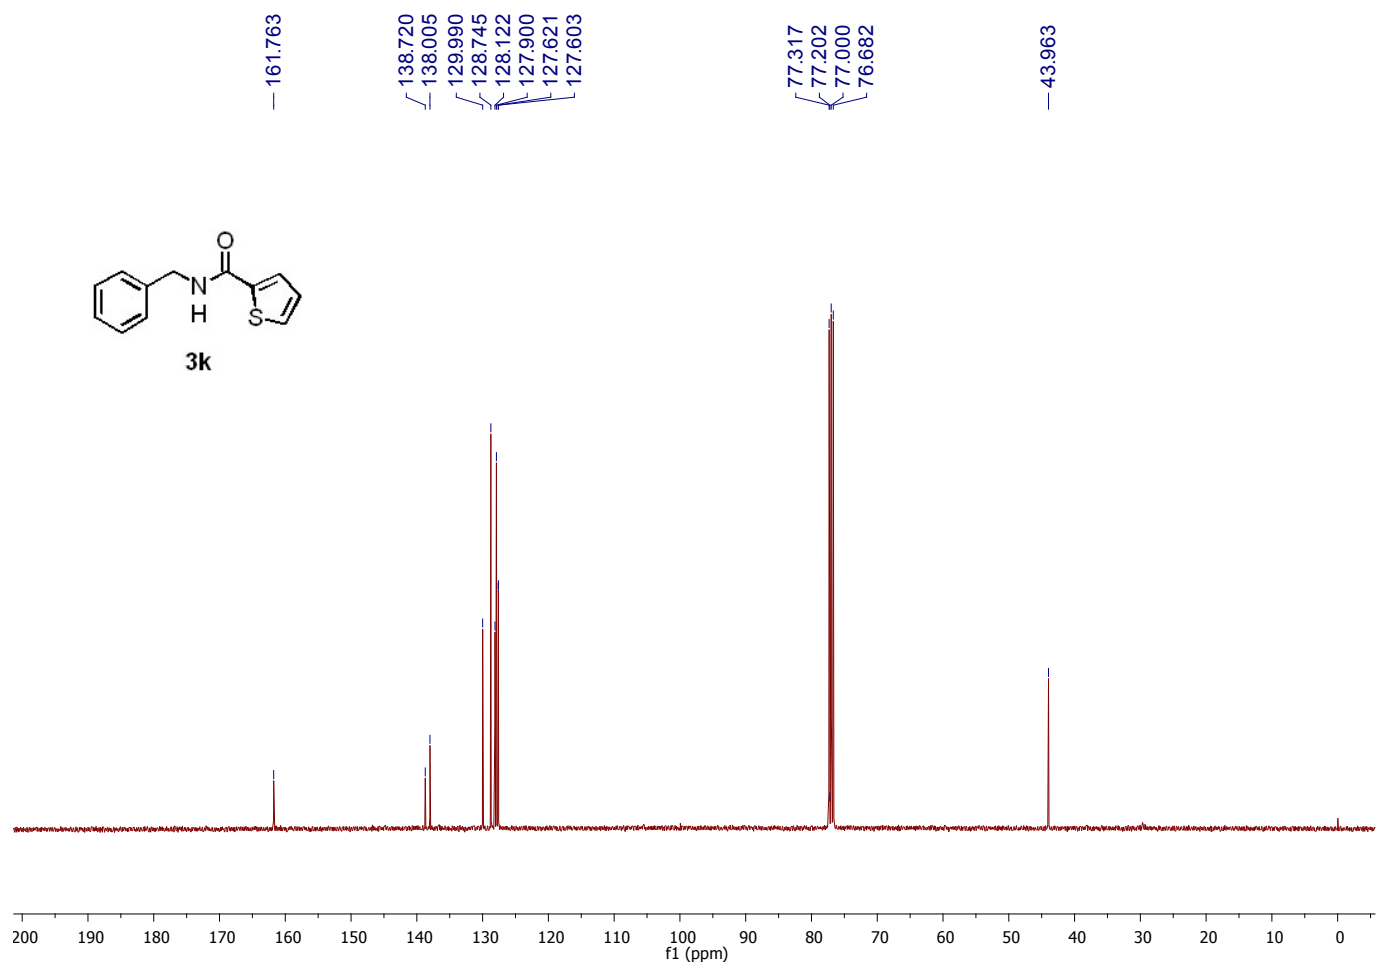

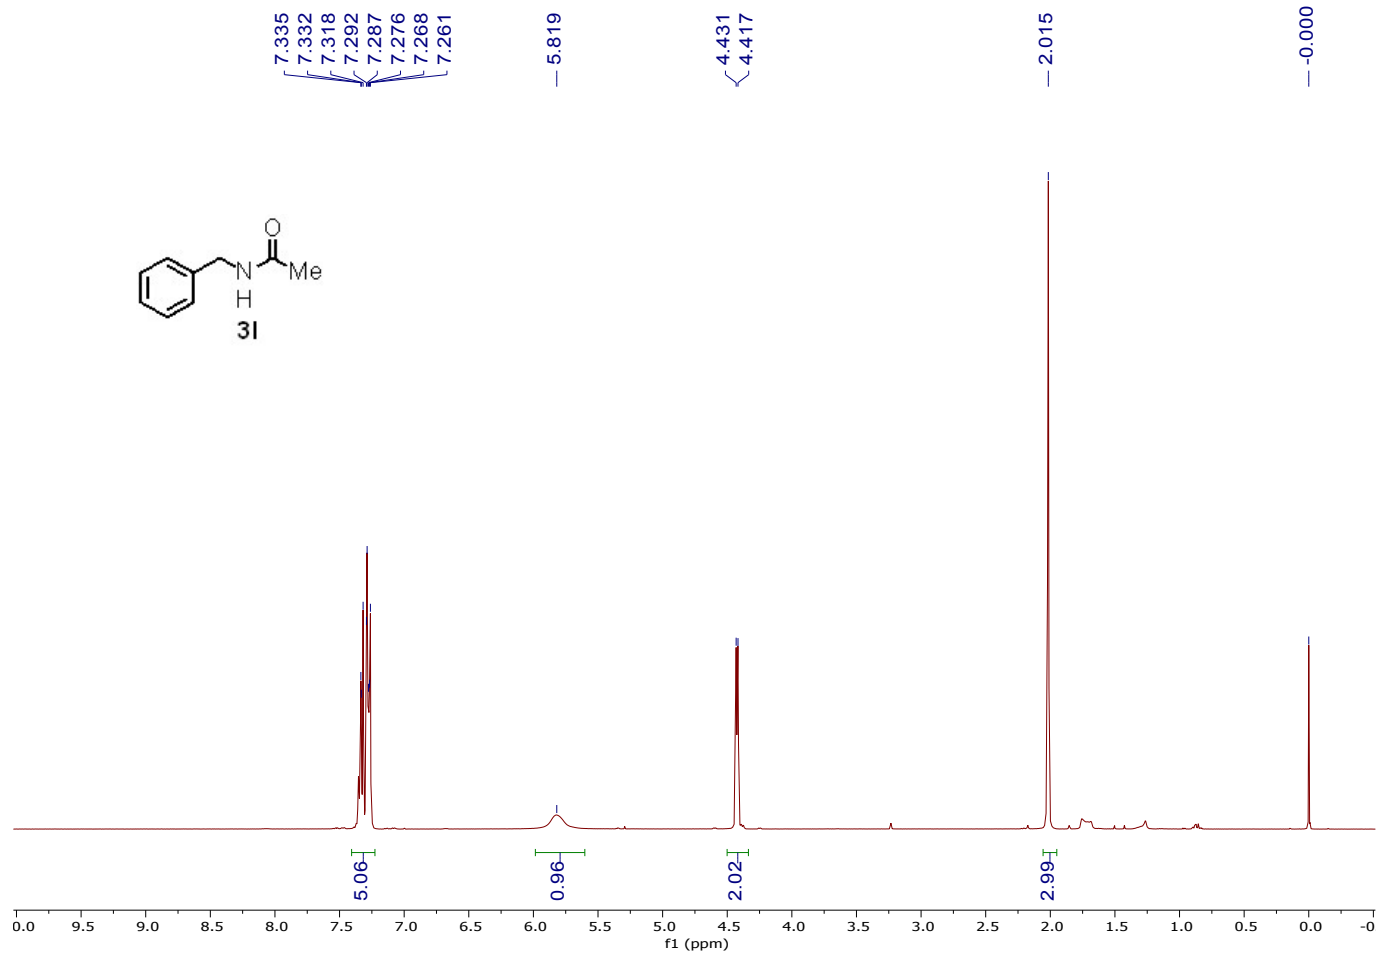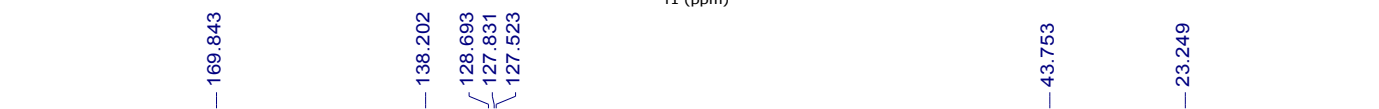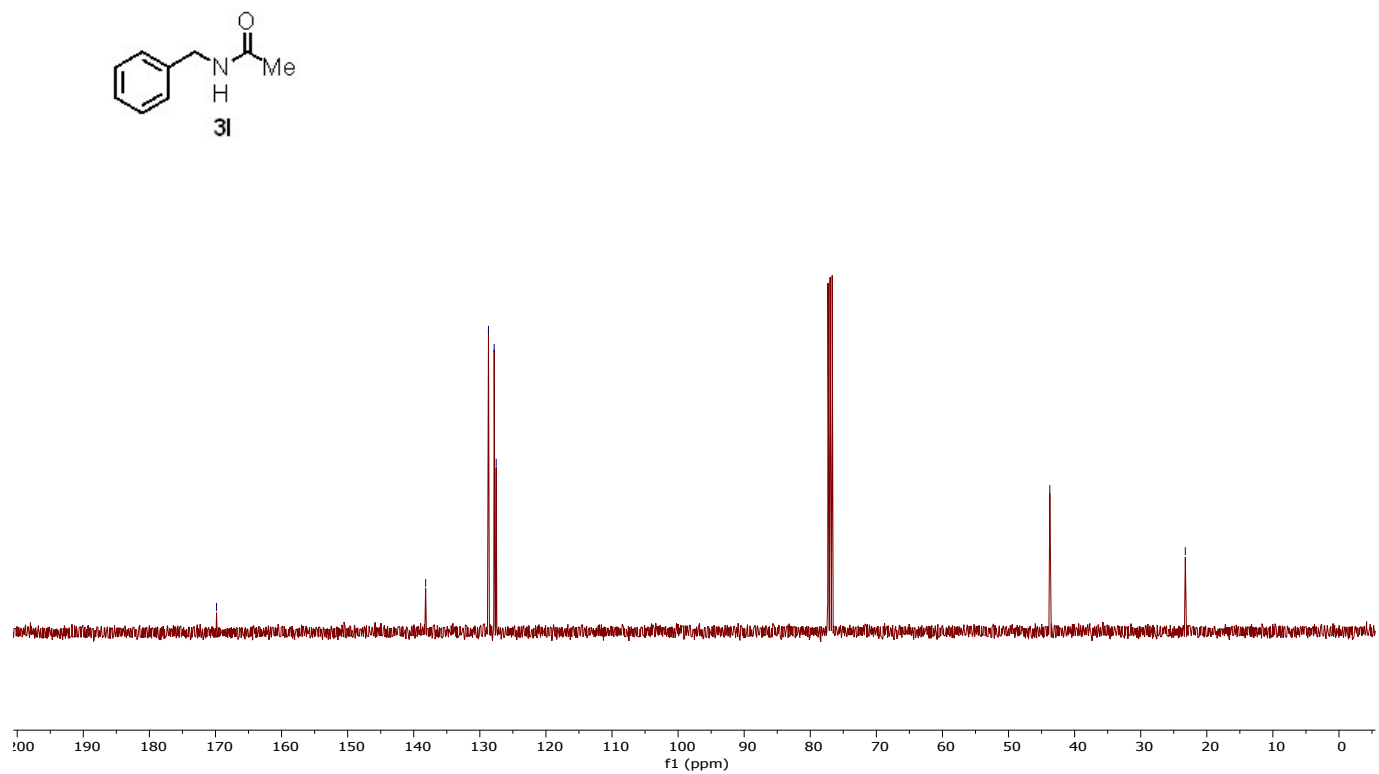

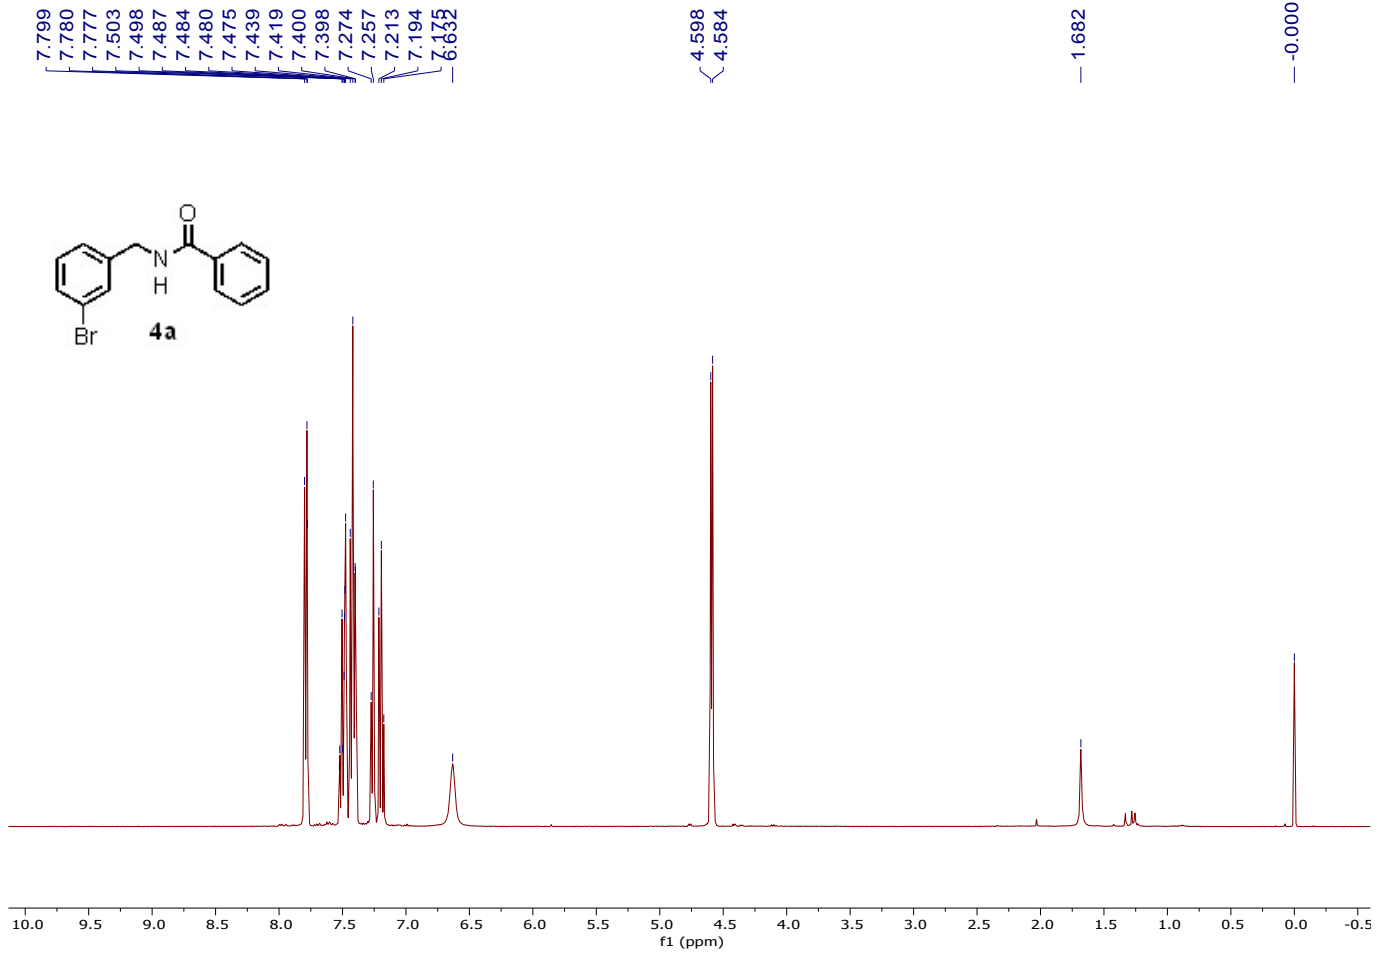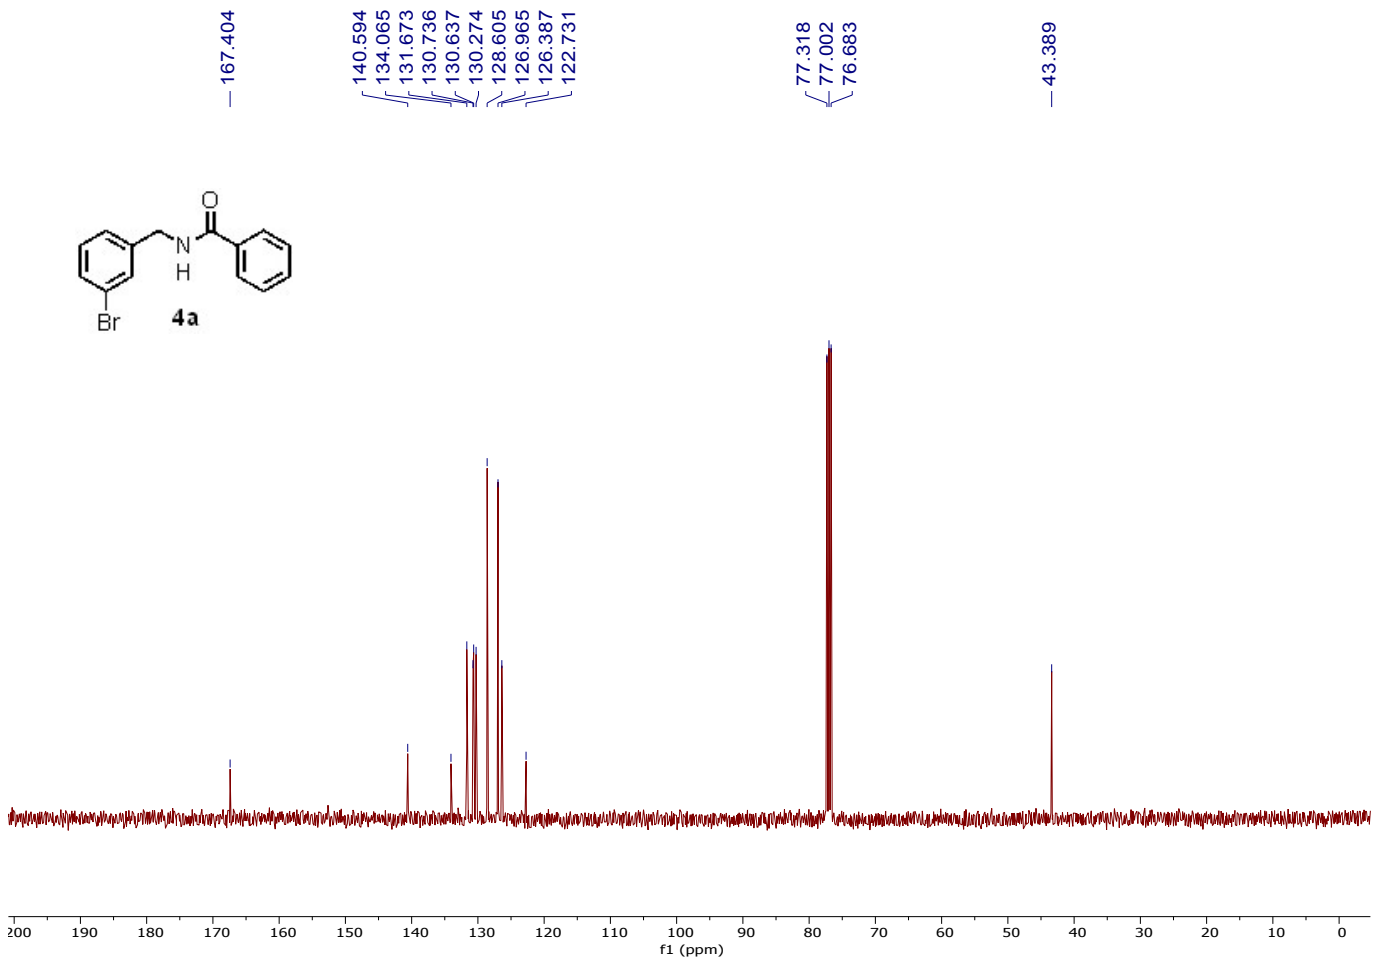

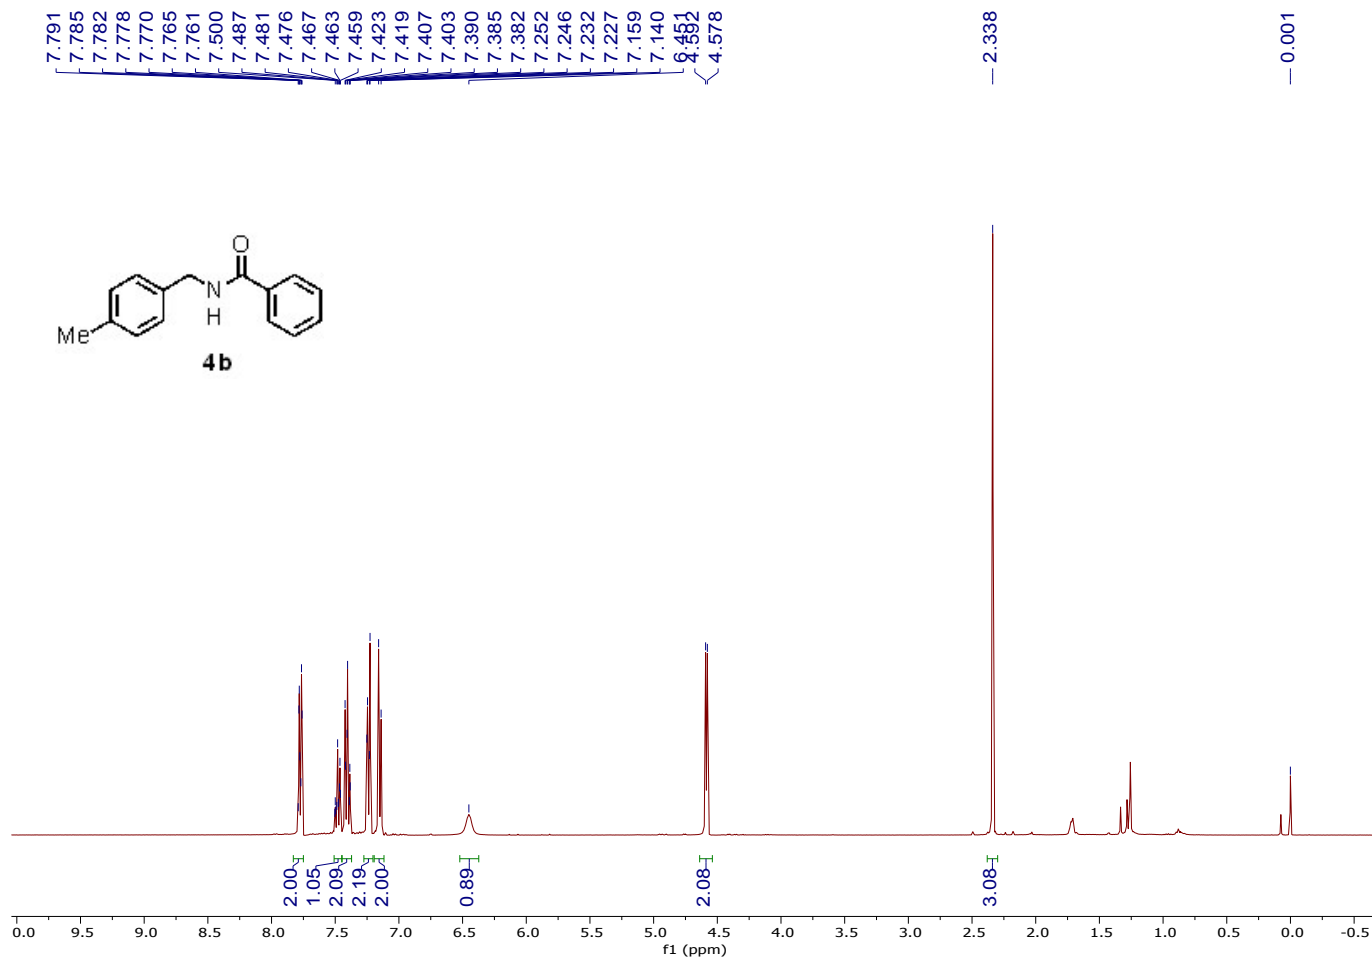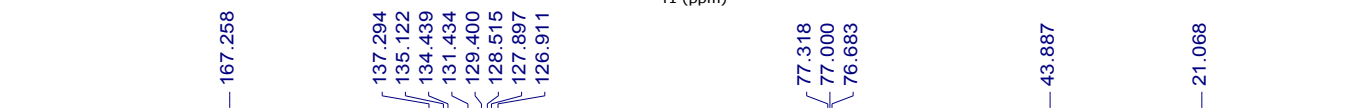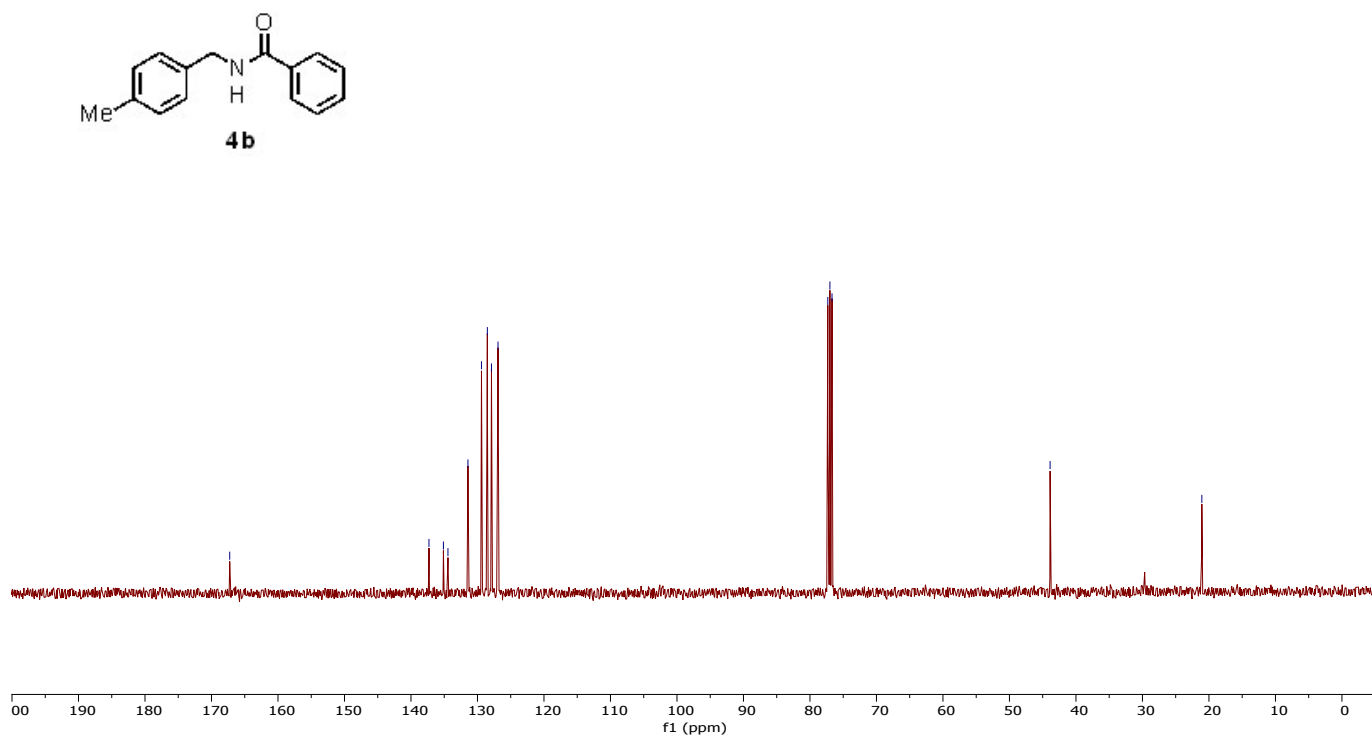

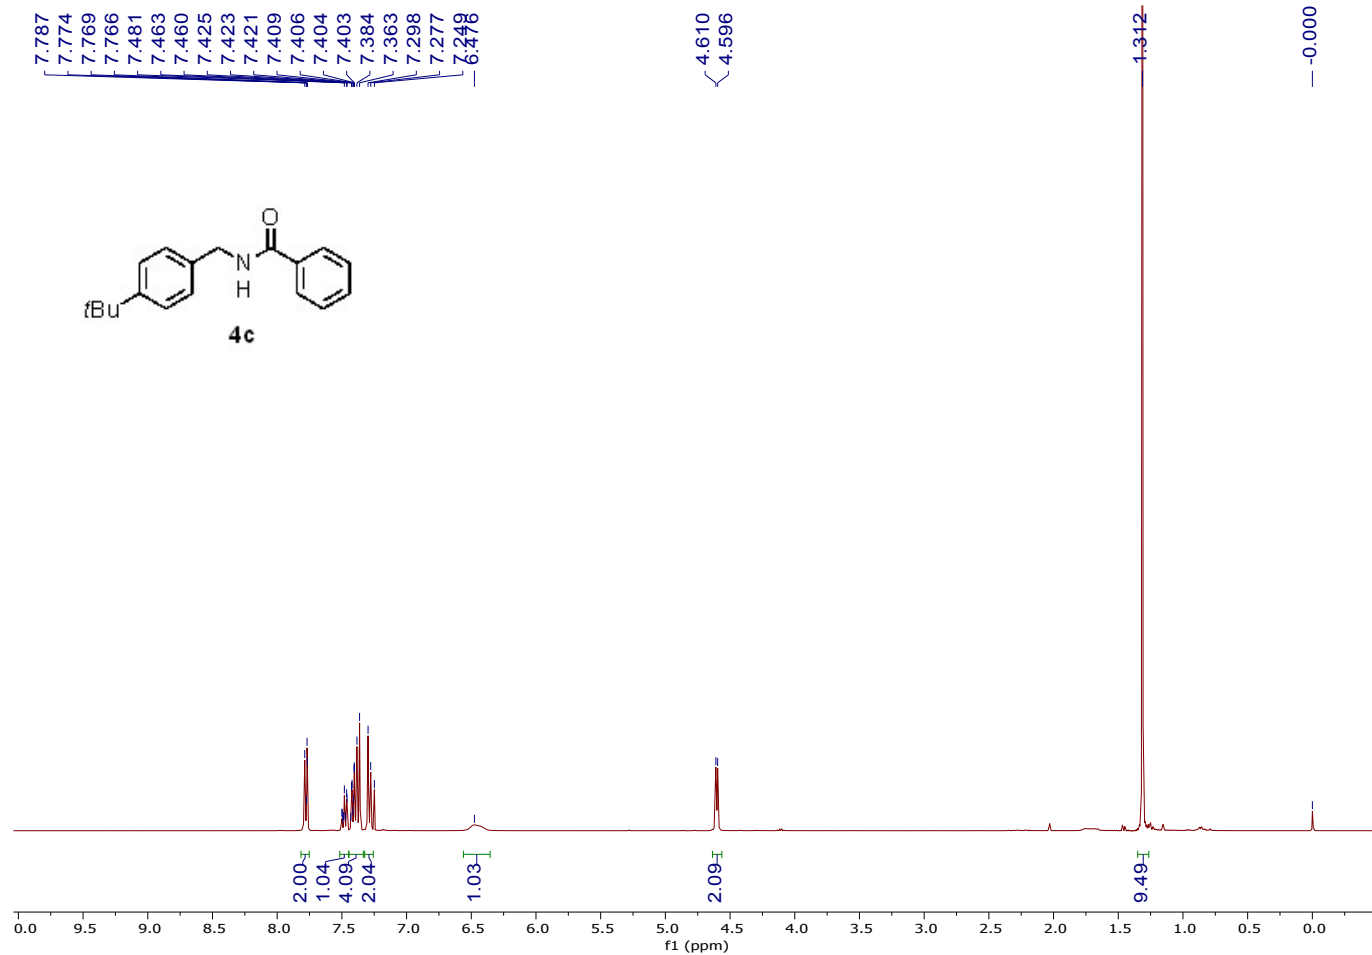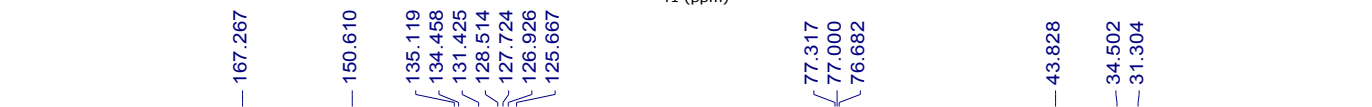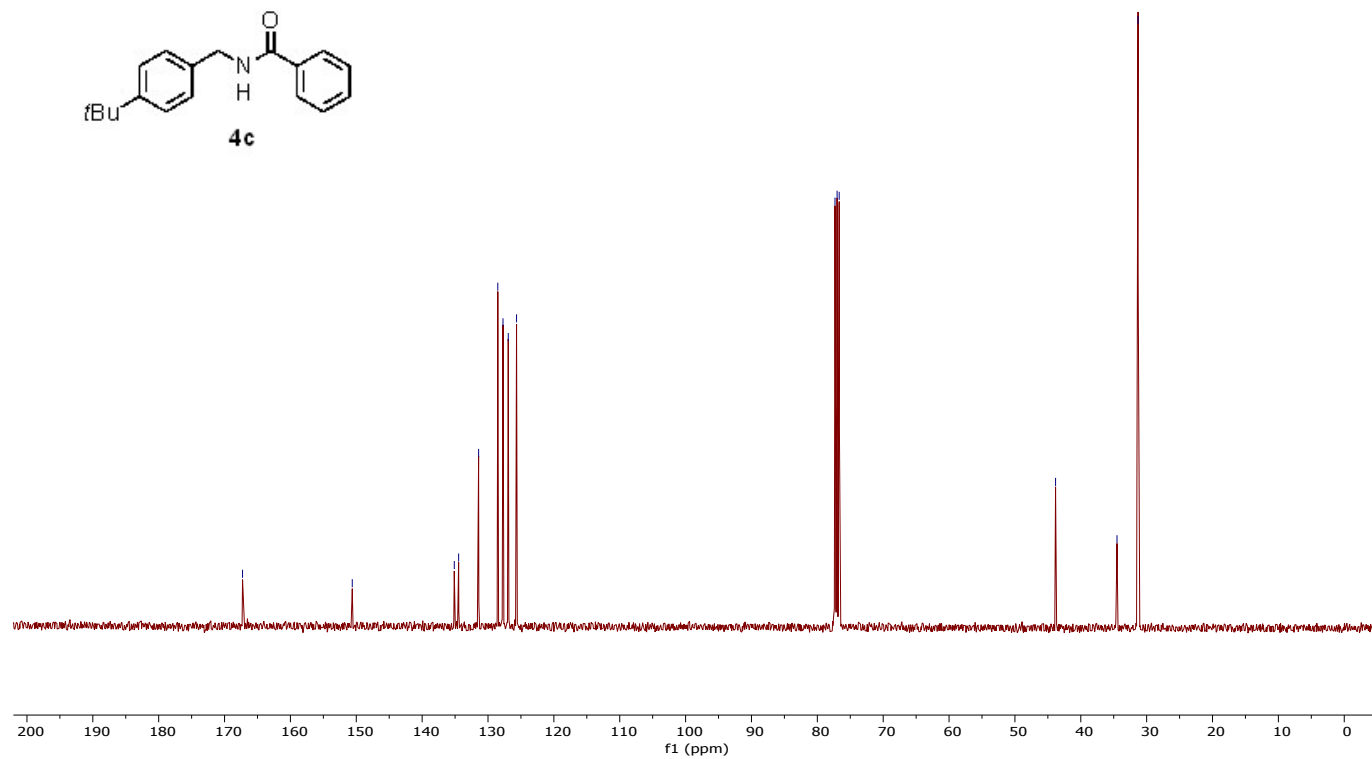



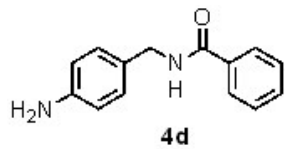

7.769  
 7.751  
 7.748  
 7.489  
 7.486  
 7.470  
 7.452  
 7.414  
 7.394  
 7.377  
 7.257  
 7.140  
 7.120  
 6.654  
 6.633  
 6.395

— 3.570

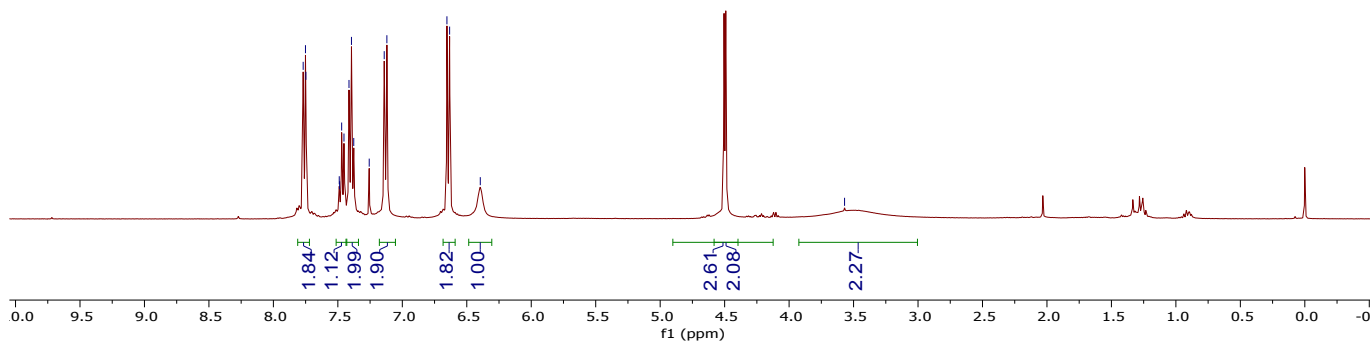

— 167.178

— 145.947

134.528

131.341

129.236

128.470

127.857

126.882

— 115.208

77.318

77.000

76.683

— 43.791

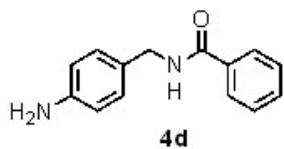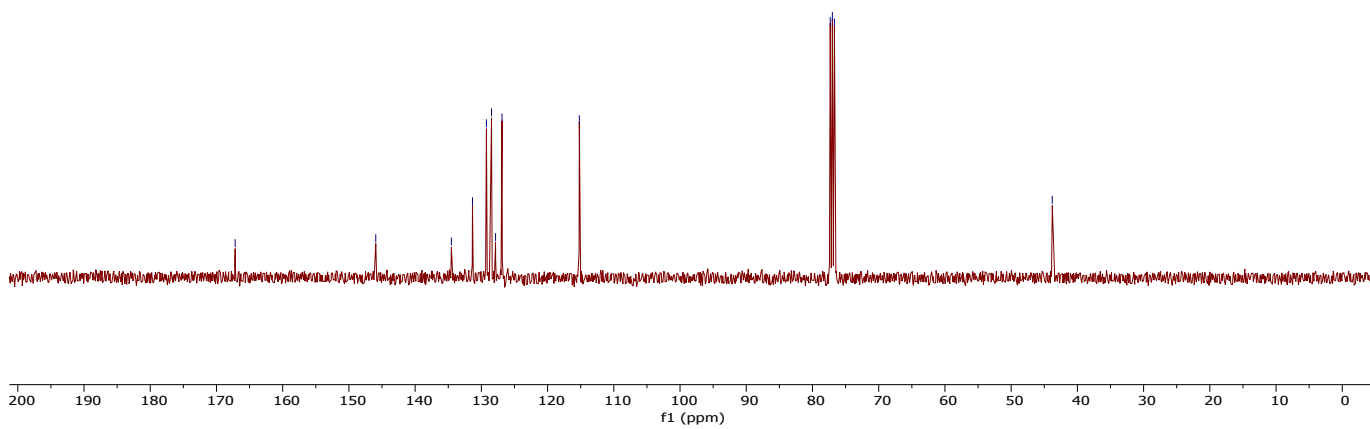

7.806  
7.787  
7.468  
7.465  
7.449  
7.446  
7.431  
7.428  
7.375  
7.371  
7.355  
7.337  
7.028  
6.852  
6.837  
6.774  
6.769  
6.760  
6.753  
6.748

4.517  
4.503

3.805  
3.778

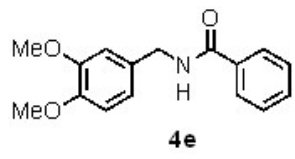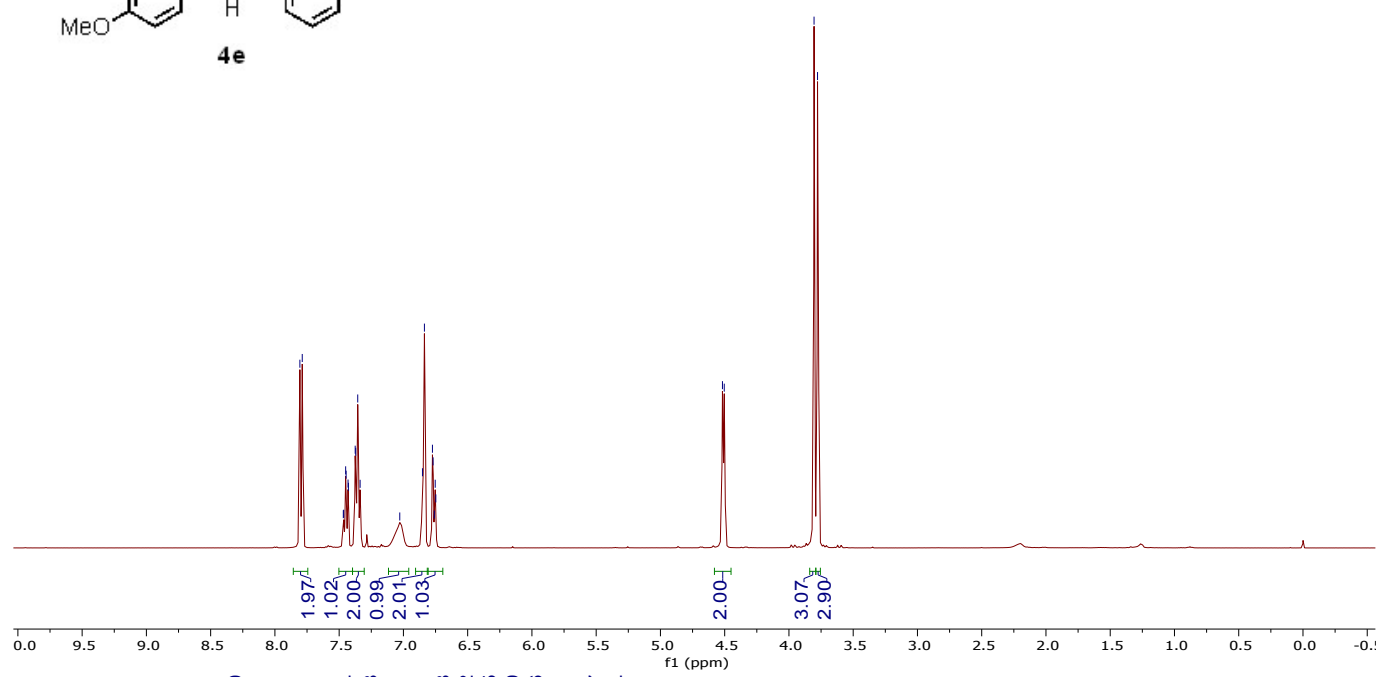

167.210

148.874  
148.188

134.198  
131.212  
130.815  
128.259  
126.836  
119.941  
111.097  
111.074

77.319  
77.000  
76.682

55.678  
55.592

43.637

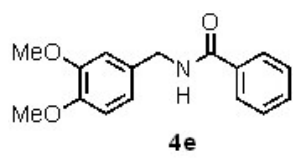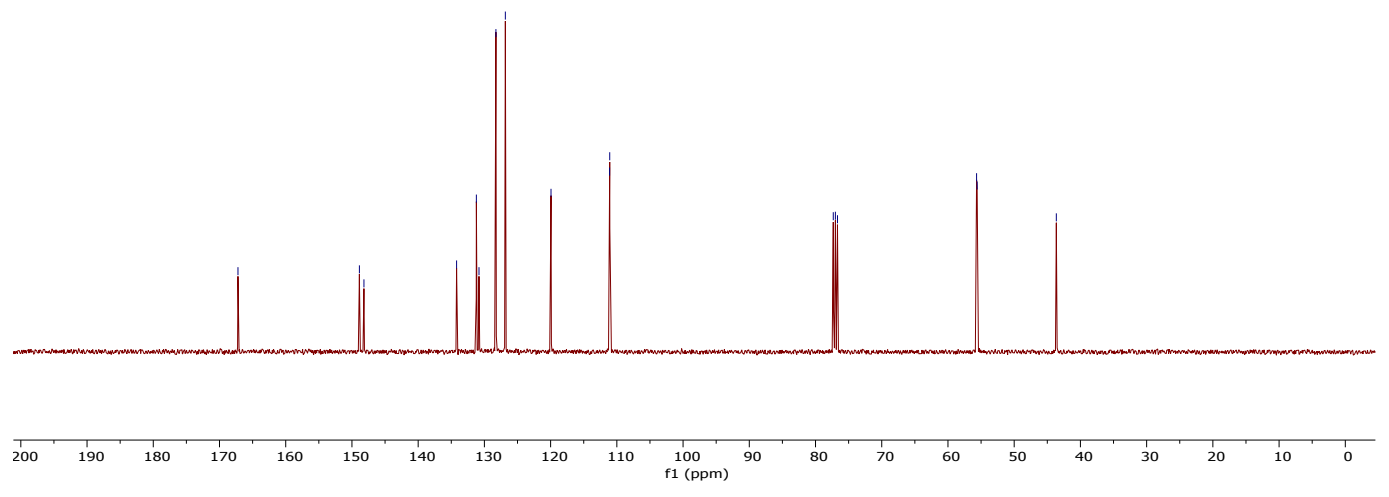

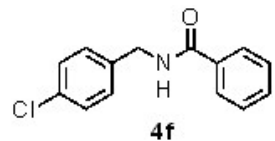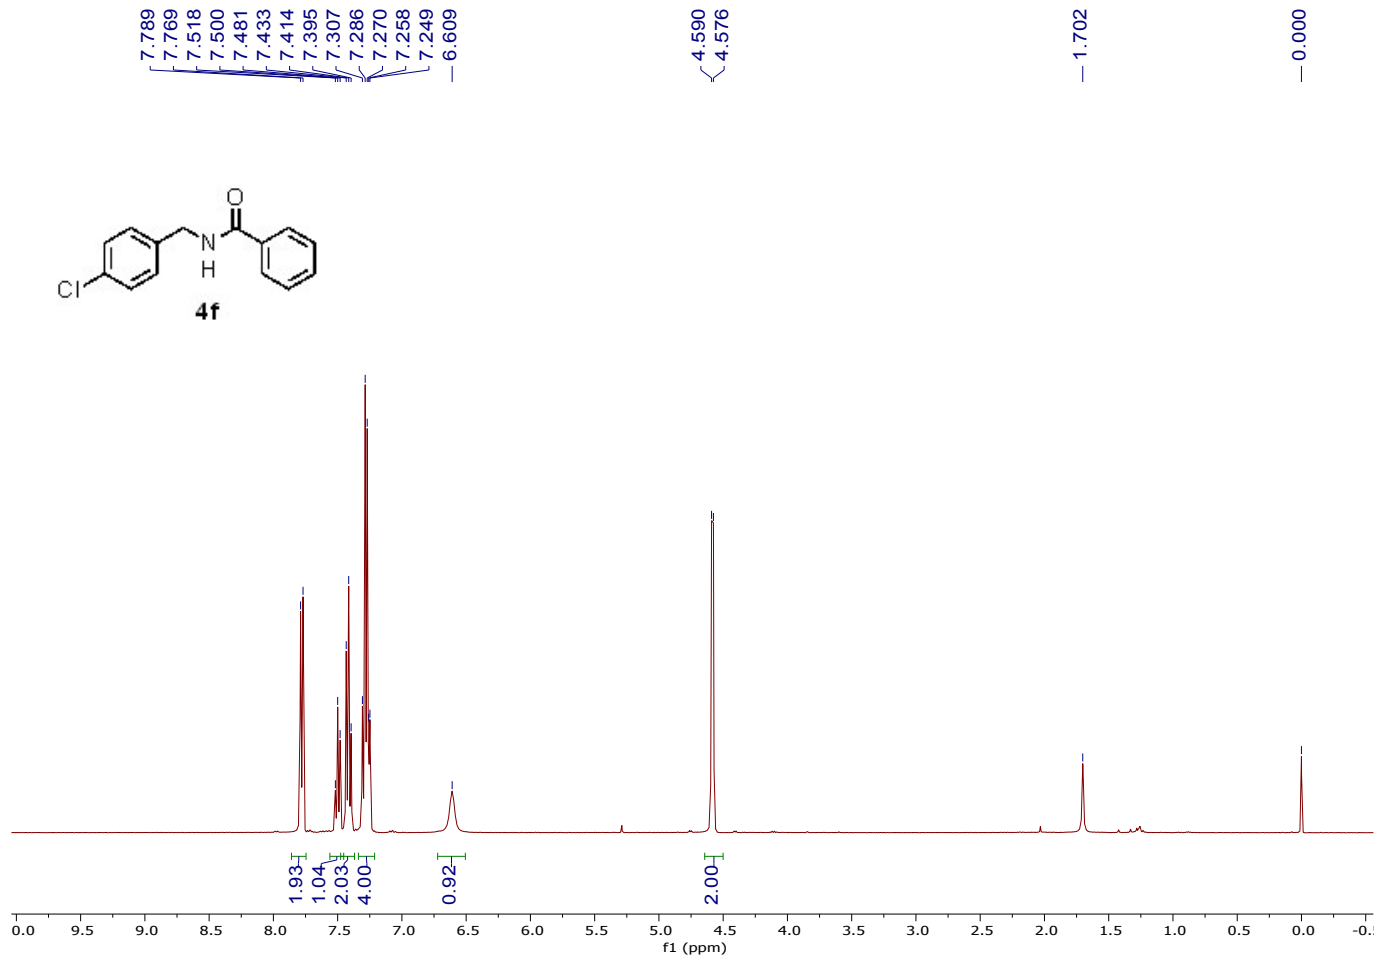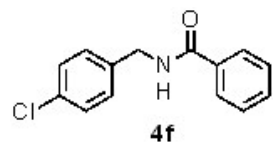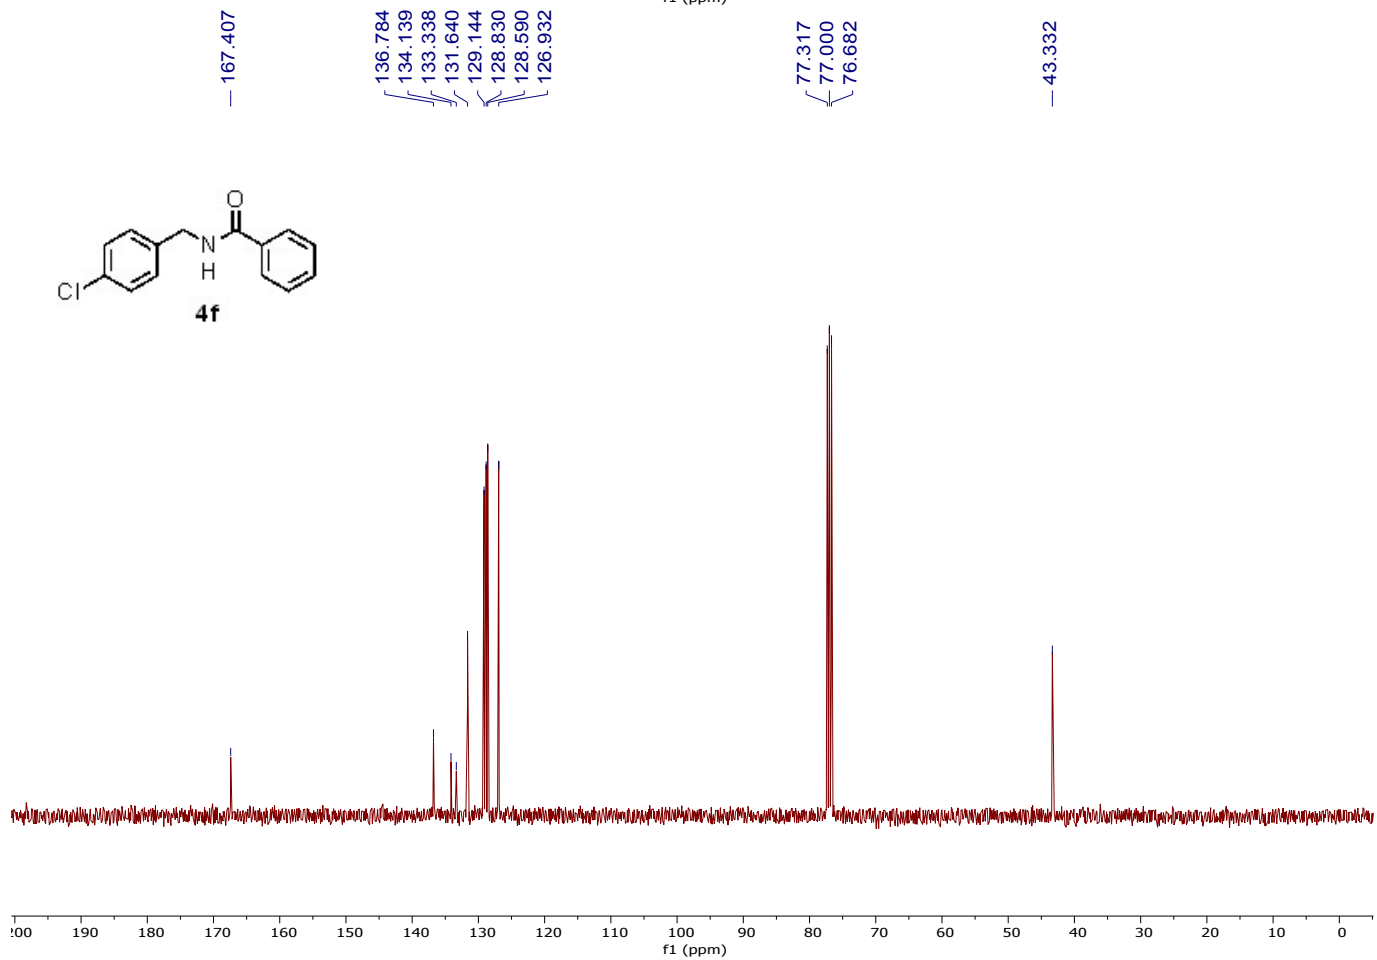

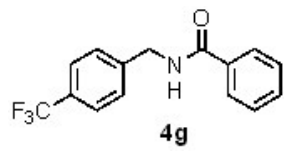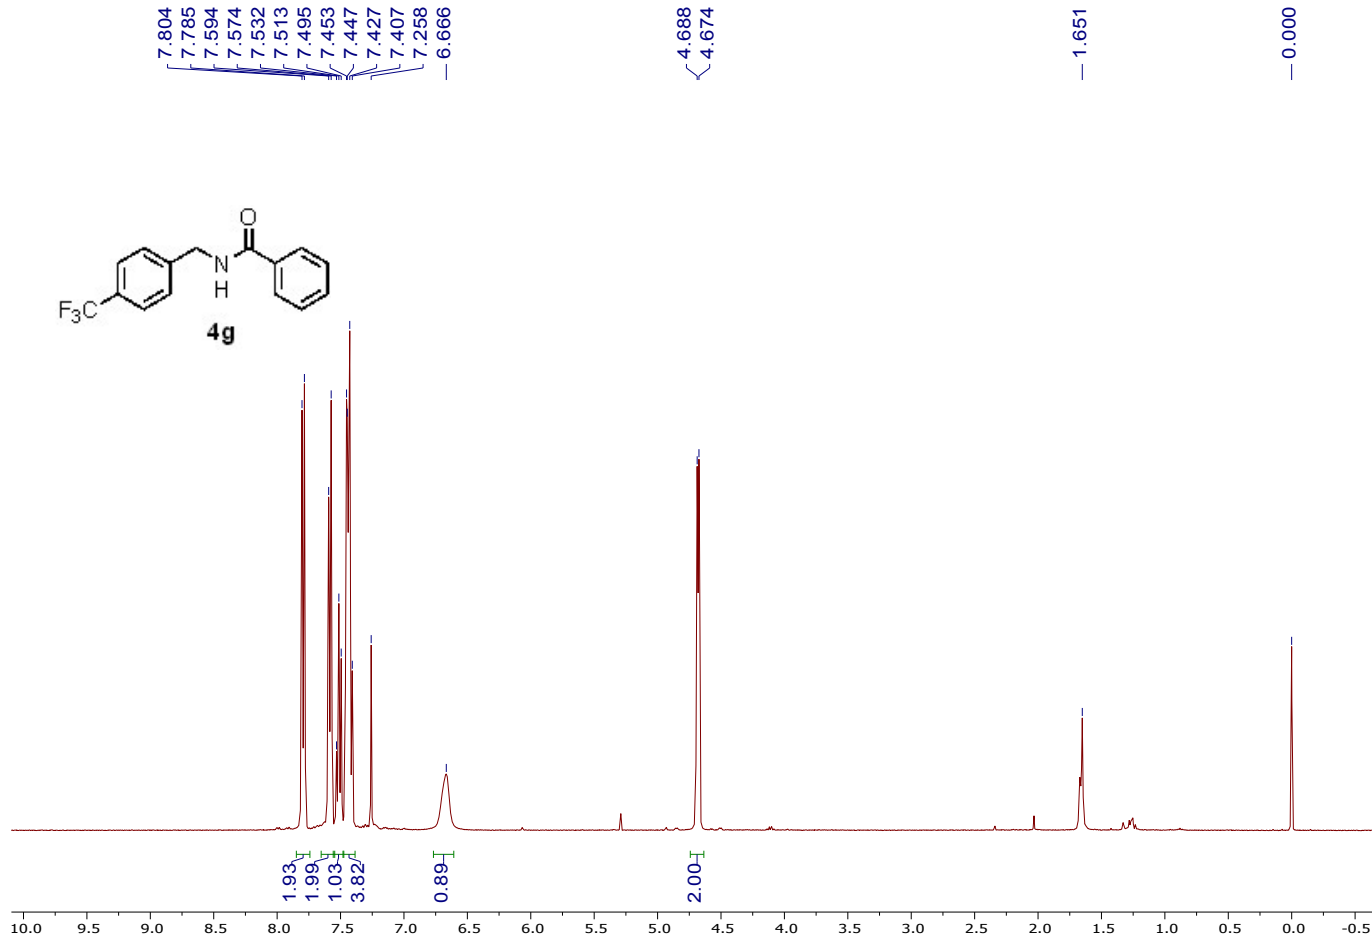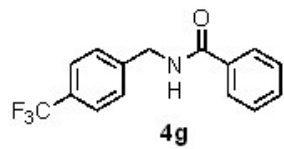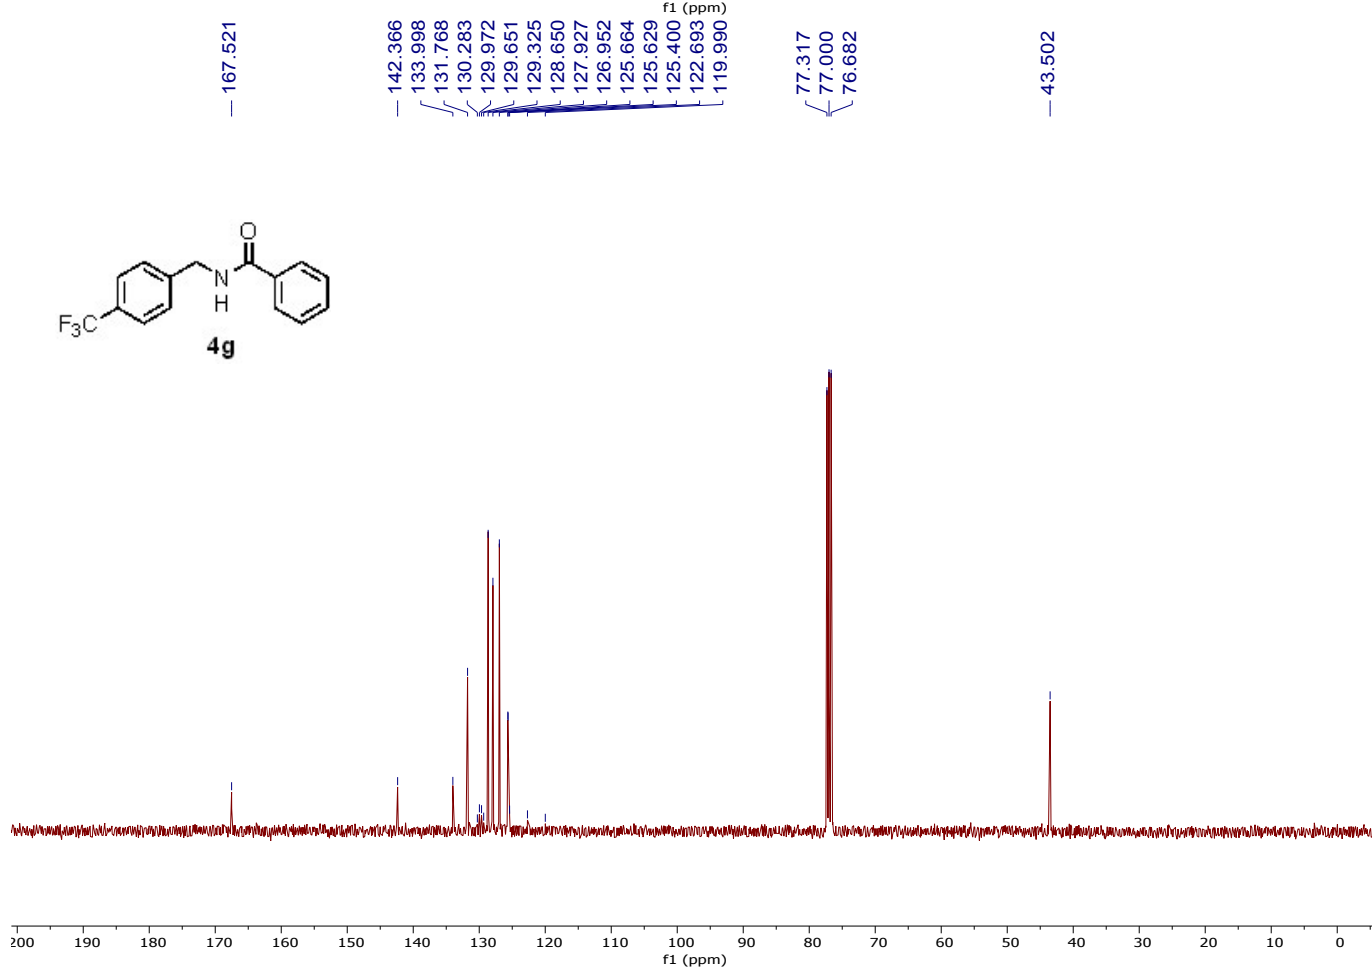

8.098  
8.094  
8.092  
8.080  
8.078  
8.074  
7.903  
7.900  
7.896  
7.883  
7.879  
7.848  
7.845  
7.830  
7.827  
7.825  
7.759  
7.756  
7.752  
7.744  
7.739  
7.735  
7.564  
7.551  
7.547  
7.544  
7.533  
7.529  
7.527  
7.521  
7.517  
7.514  
7.511  
7.503  
7.500  
7.497  
7.493  
7.485  
7.467  
7.461  
7.448  
7.444  
7.441  
7.423  
7.402  
7.397  
7.386  
7.382  
7.378  
7.368  
7.364  
7.361  
7.253  
6.374  
5.093  
5.080  
0.001

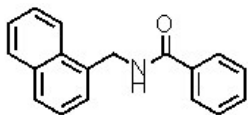

4h

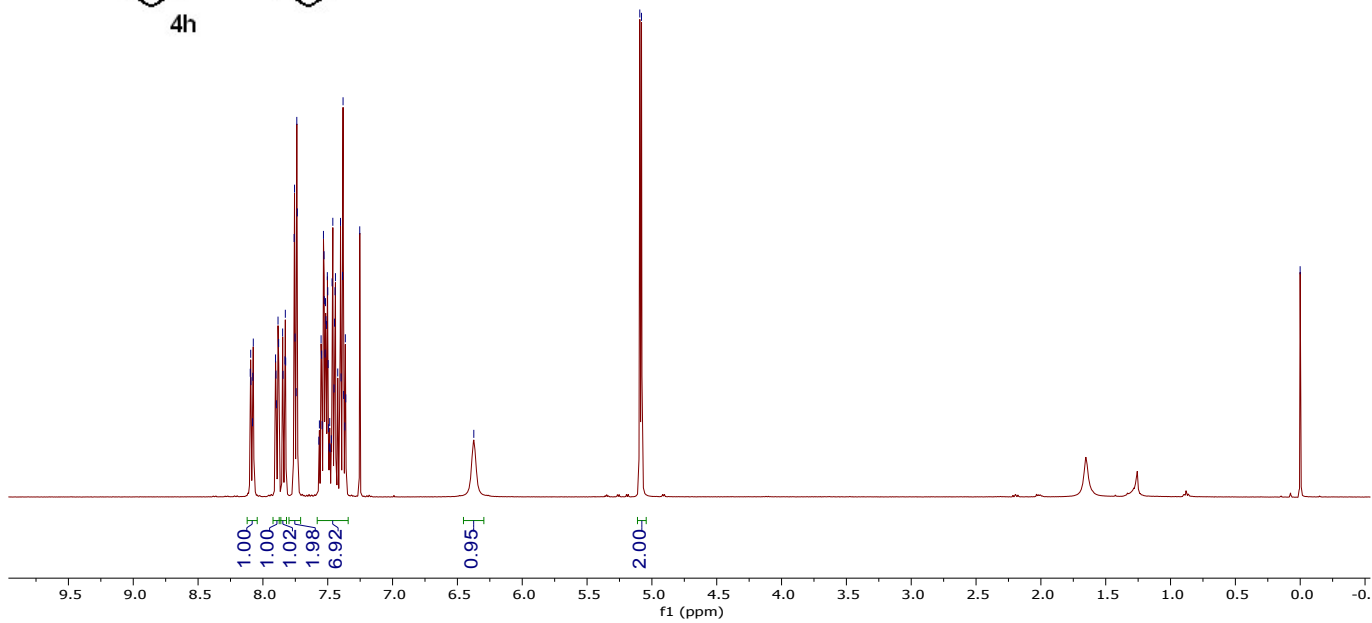

167.137  
134.286  
133.918  
133.357  
131.511  
131.482  
128.799  
128.776  
128.544  
126.936  
126.755  
126.048  
125.403  
123.488  
77.317  
77.001  
76.682  
42.407

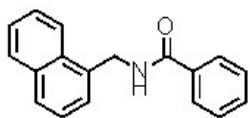

4h

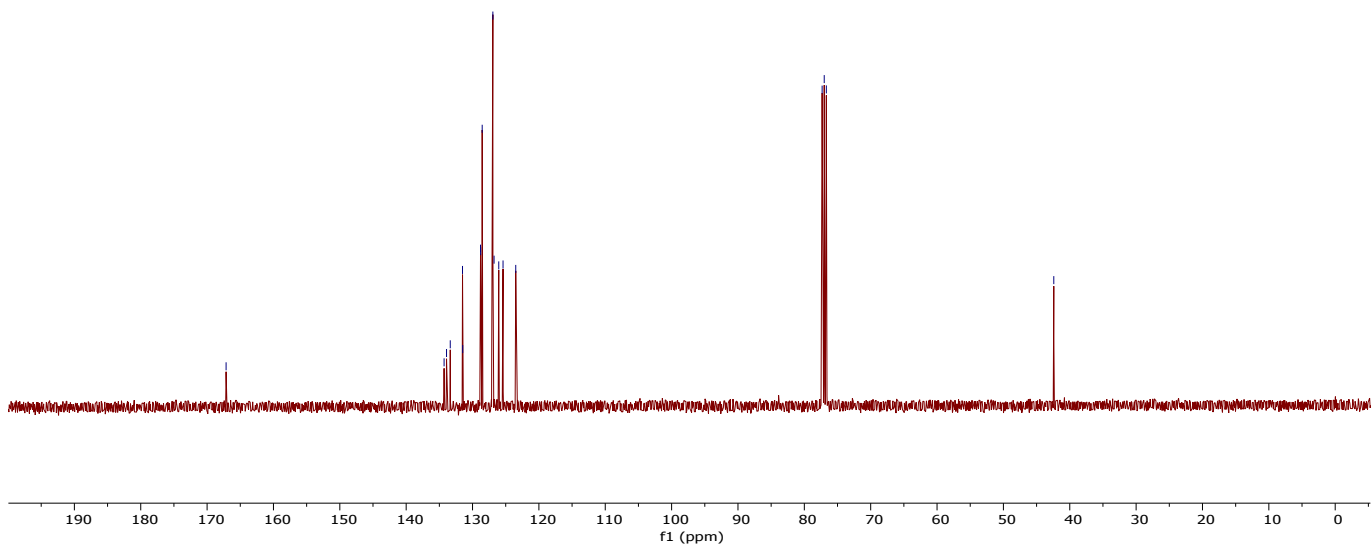

7.787  
7.782  
7.779  
7.775  
7.767  
7.762  
7.758  
7.483  
7.480  
7.470  
7.465  
7.460  
7.450  
7.446  
7.443  
7.399  
7.396  
7.394  
7.391  
7.379  
7.375  
7.371  
7.361  
7.357  
7.355  
7.352  
7.250  
7.213  
7.210  
7.200  
7.197  
7.000  
6.998  
6.995  
6.992  
6.989  
6.987  
6.984  
6.943  
6.934  
6.930  
6.921  
6.848  
4.766  
4.752

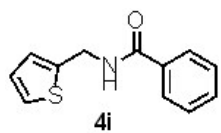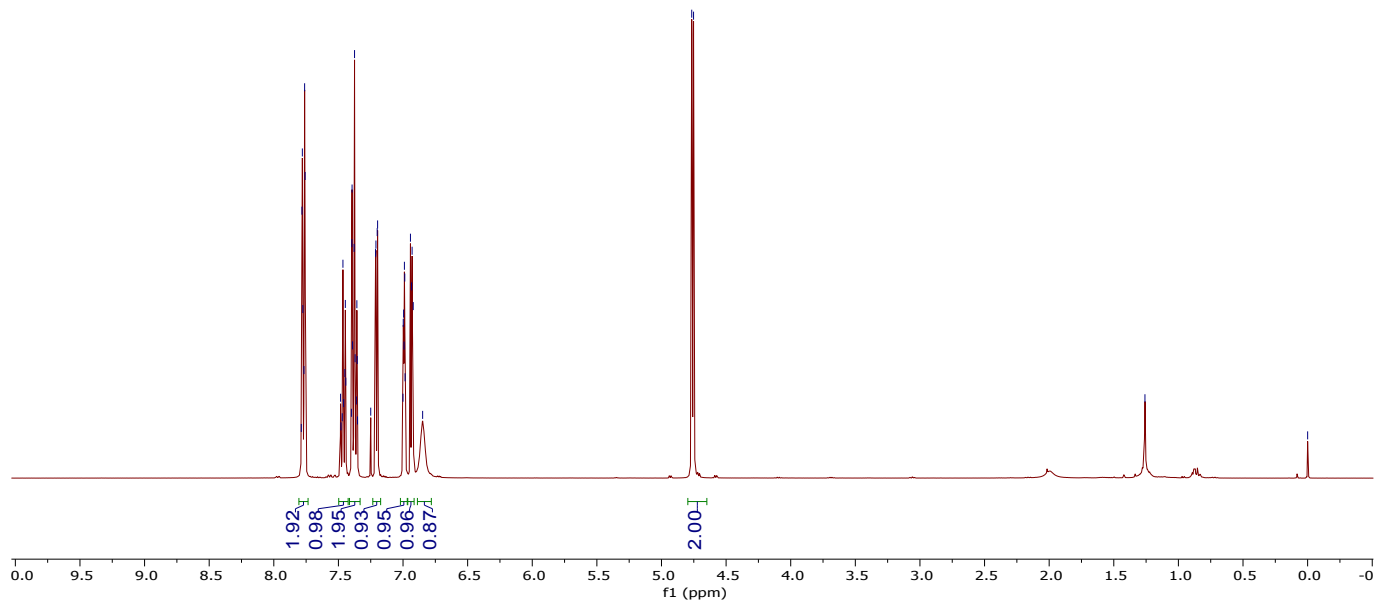

167.186  
140.832  
134.044  
131.496  
128.448  
126.971  
126.820  
126.042  
125.149  
77.318  
77.000  
76.681  
38.701

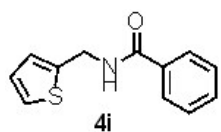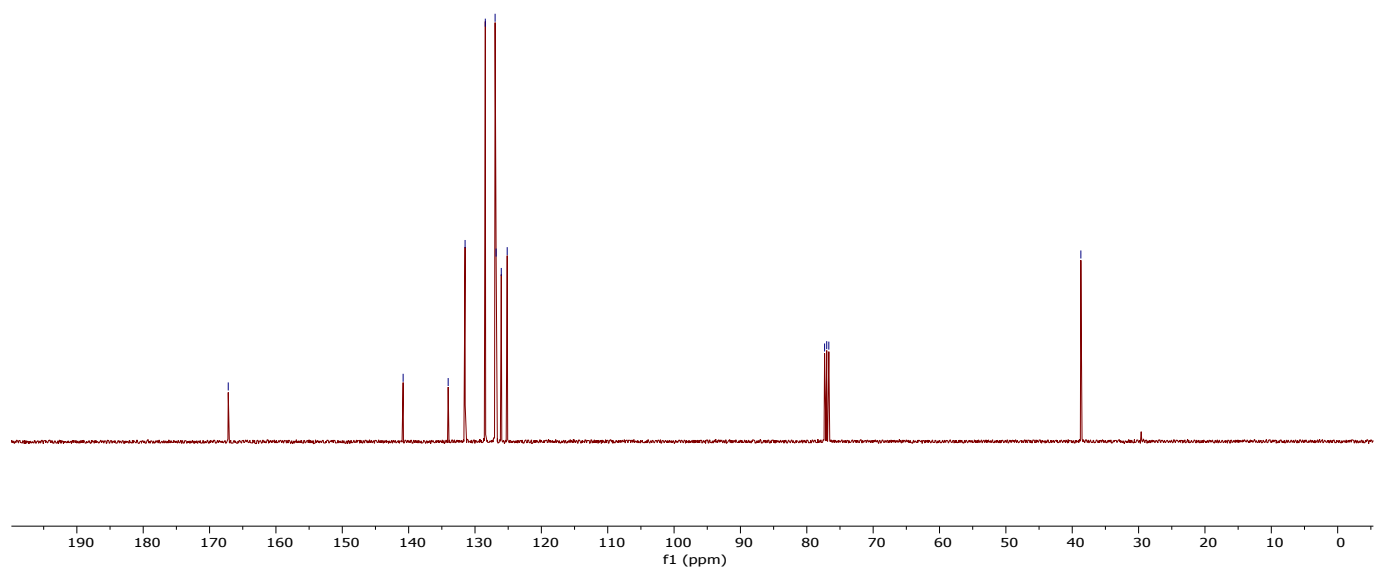

1.259

-0.000

8.528  
8.520  
7.792  
7.774  
7.718  
7.623  
7.618  
7.604  
7.599  
7.584  
7.580  
7.466  
7.463  
7.455  
7.448  
7.442  
7.434  
7.430  
7.426  
7.400  
7.385  
7.380  
7.367  
7.363  
7.359  
7.194  
7.174  
7.156  
7.144  
7.137  
7.125  
3.857  
3.842  
3.827  
3.811  
3.100  
3.084  
3.069

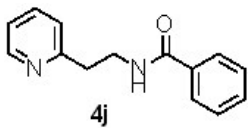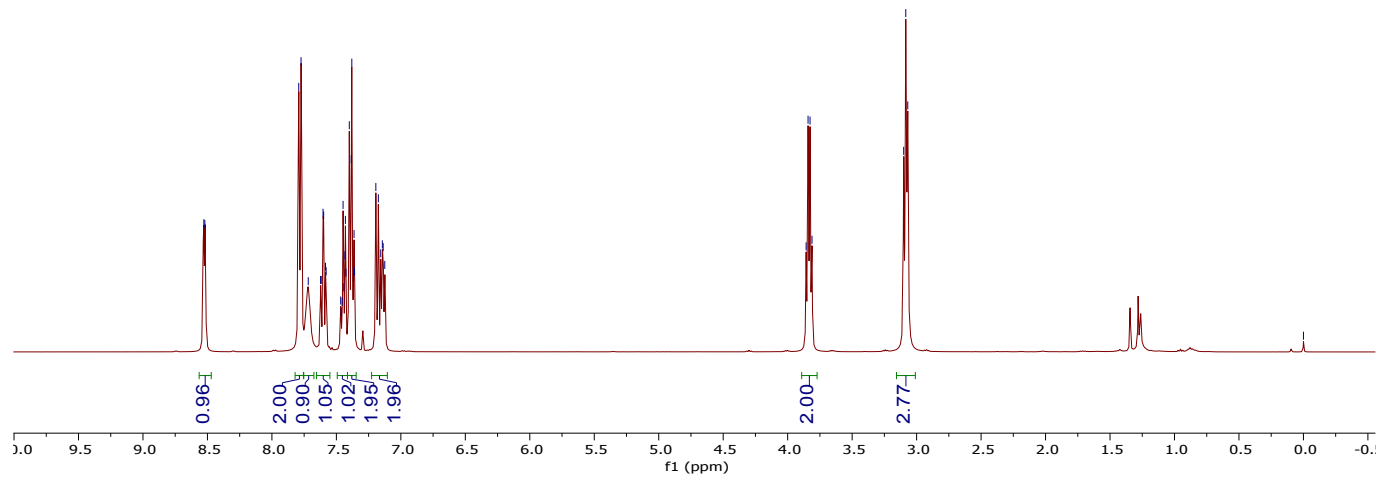

167.227  
159.552  
148.895  
136.621  
134.544  
131.052  
128.262  
126.792  
123.391  
121.491  
77.318  
77.000  
76.681  
39.153  
36.530

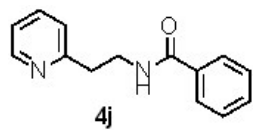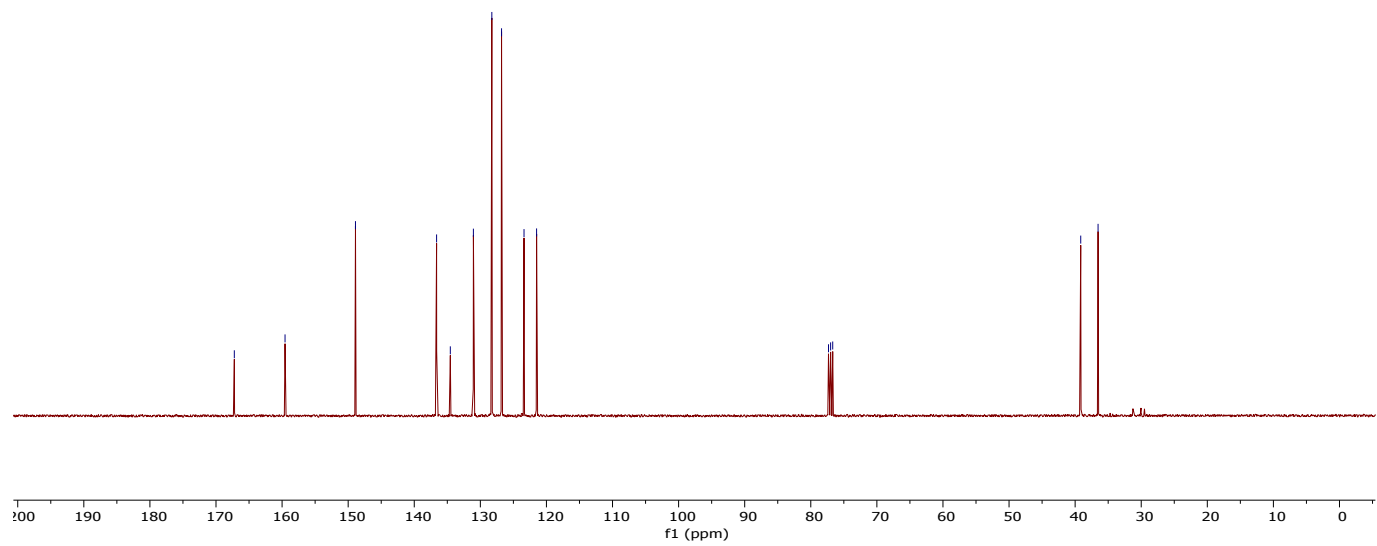

7.733  
7.730  
7.726  
7.717  
7.712  
7.708  
7.570  
7.551  
7.548  
7.496  
7.484  
7.478  
7.473  
7.463  
7.460  
7.456  
7.425  
7.421  
7.416  
7.405  
7.401  
7.396  
7.387  
7.383  
7.380  
7.274  
7.264  
7.261  
7.259  
7.255  
7.249  
7.246  
7.133  
7.123  
7.115  
7.108  
7.103  
7.100  
7.095  
7.087  
7.080  
7.068  
6.310  
3.759  
3.744  
3.742  
3.727  
3.724  
3.710  
3.114  
3.097  
3.080  
1.752  
-0.000

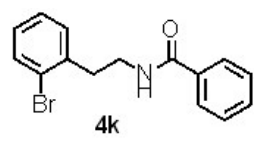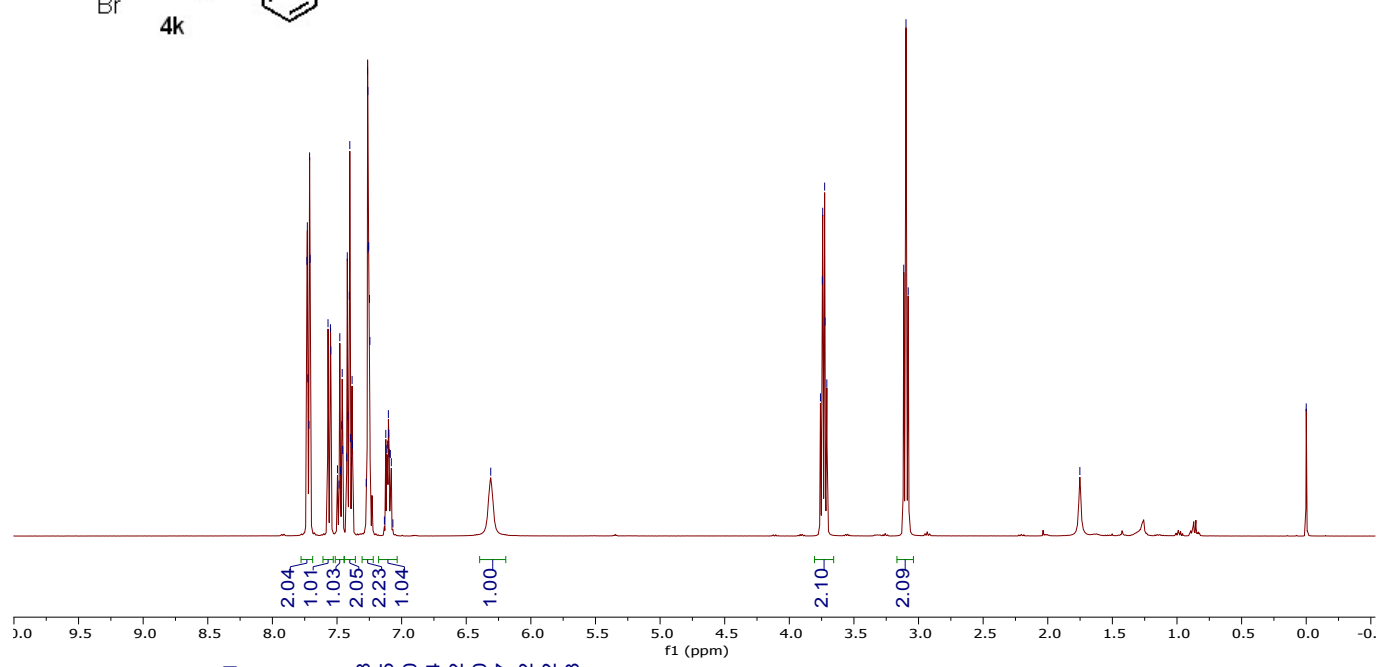

167.561  
138.328  
134.515  
132.950  
131.384  
131.052  
128.510  
128.327  
127.662  
126.822  
124.553  
77.318  
77.000  
76.683  
39.832  
35.689

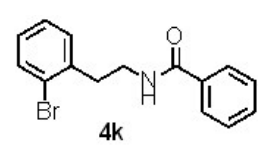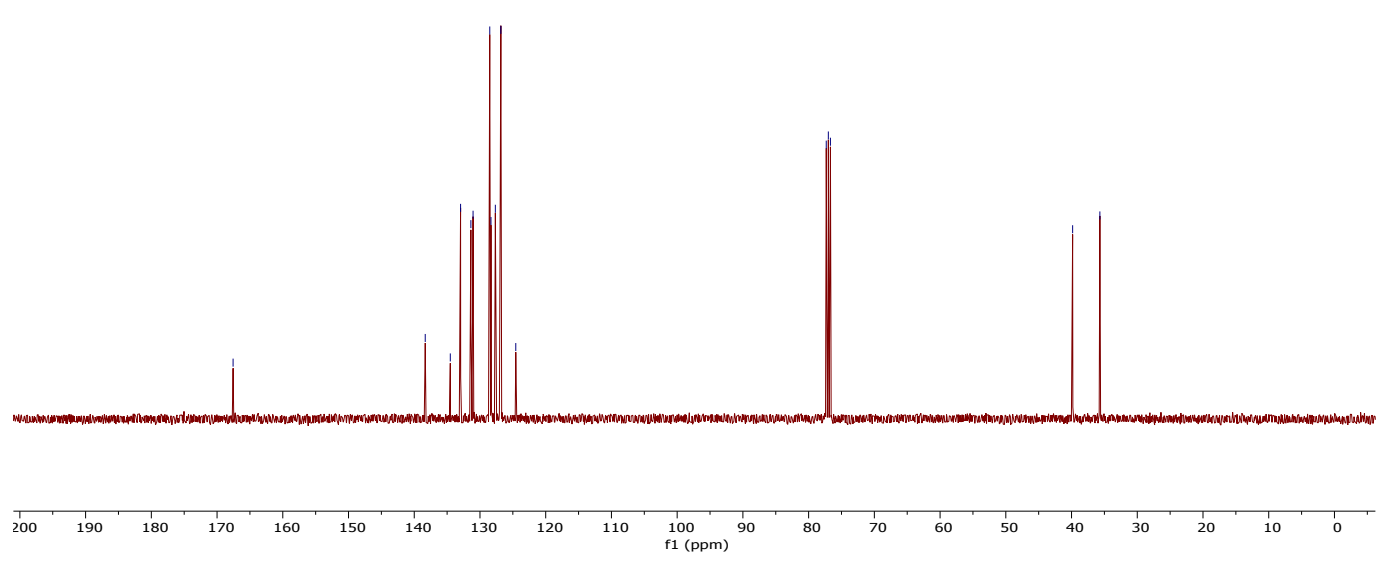



7.780  
7.775  
7.772  
7.768  
7.759  
7.754  
7.751  
7.492  
7.479  
7.473  
7.468  
7.458  
7.455  
7.420  
7.401  
7.384  
7.382  
7.270  
— 6.351

3.465  
3.447  
3.432  
3.431  
3.414  
1.628  
1.610  
1.605  
1.591  
1.586  
1.573  
1.554  
1.447  
1.428  
1.409  
1.390  
1.372  
1.354  
0.964  
0.957  
0.946  
0.927

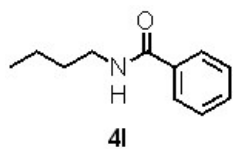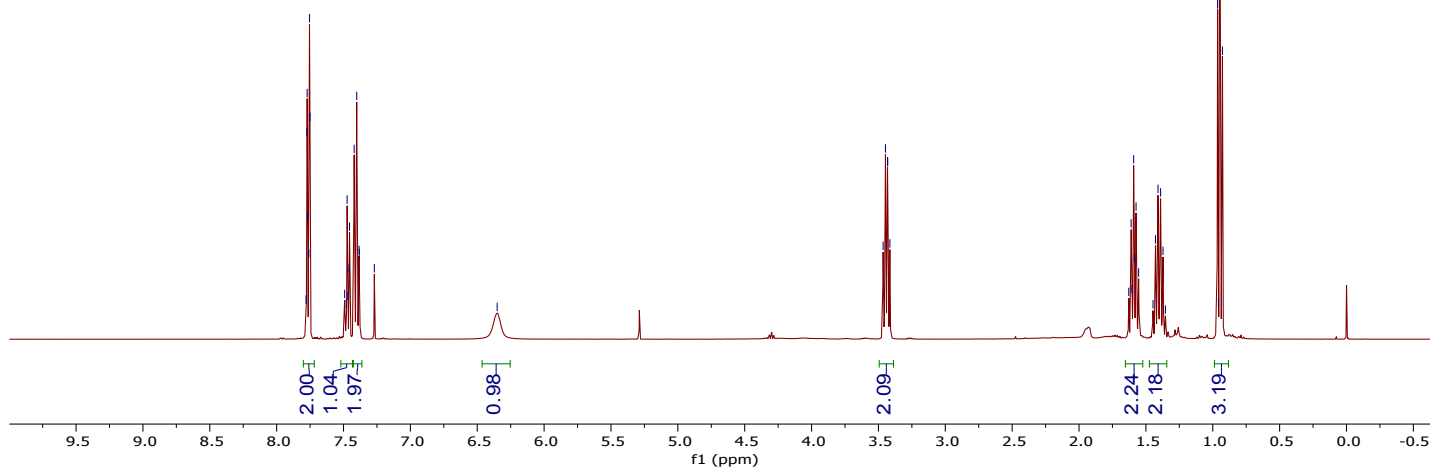

— 167.500

134.841  
131.173  
128.420  
126.792

77.317  
77.000  
76.682

— 39.755

— 31.688

— 20.100

— 13.710

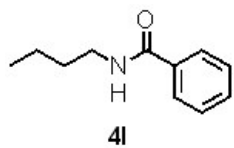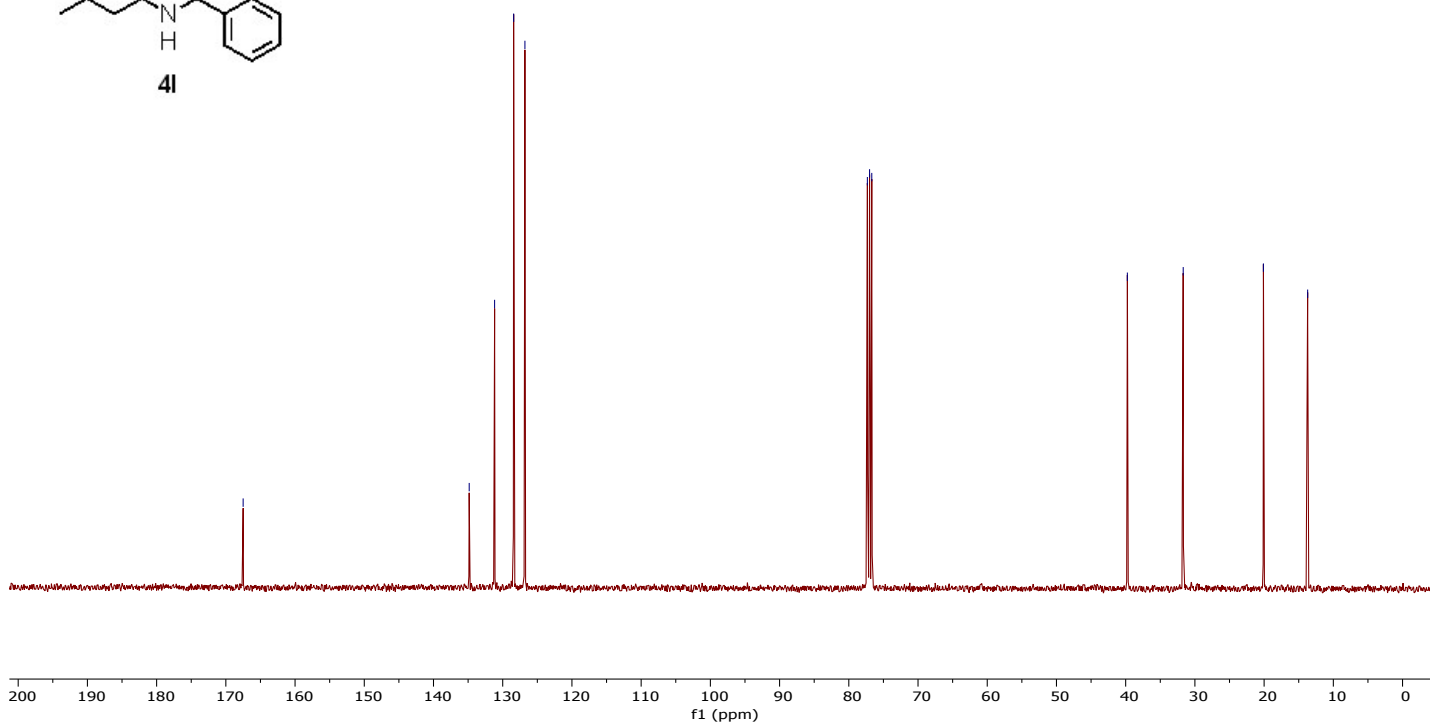

7.803  
7.800  
7.796  
7.788  
7.783  
7.779  
7.492  
7.480  
7.474  
7.469  
7.459  
7.456  
7.452  
7.415  
7.410  
7.406  
7.395  
7.391  
7.387  
7.377  
7.373  
7.370  
6.690  
5.942  
5.930  
5.927  
5.916  
5.913  
5.902  
5.899  
5.887  
5.885  
5.873  
5.255  
5.251  
5.248  
5.243  
5.213  
5.209  
5.205  
5.201  
5.164  
5.161  
5.157  
5.153  
5.139  
5.135  
5.132  
5.128  
4.066  
4.062  
4.059  
4.052  
4.048  
4.044  
4.038  
4.034  
4.030

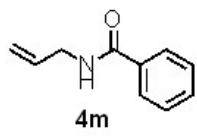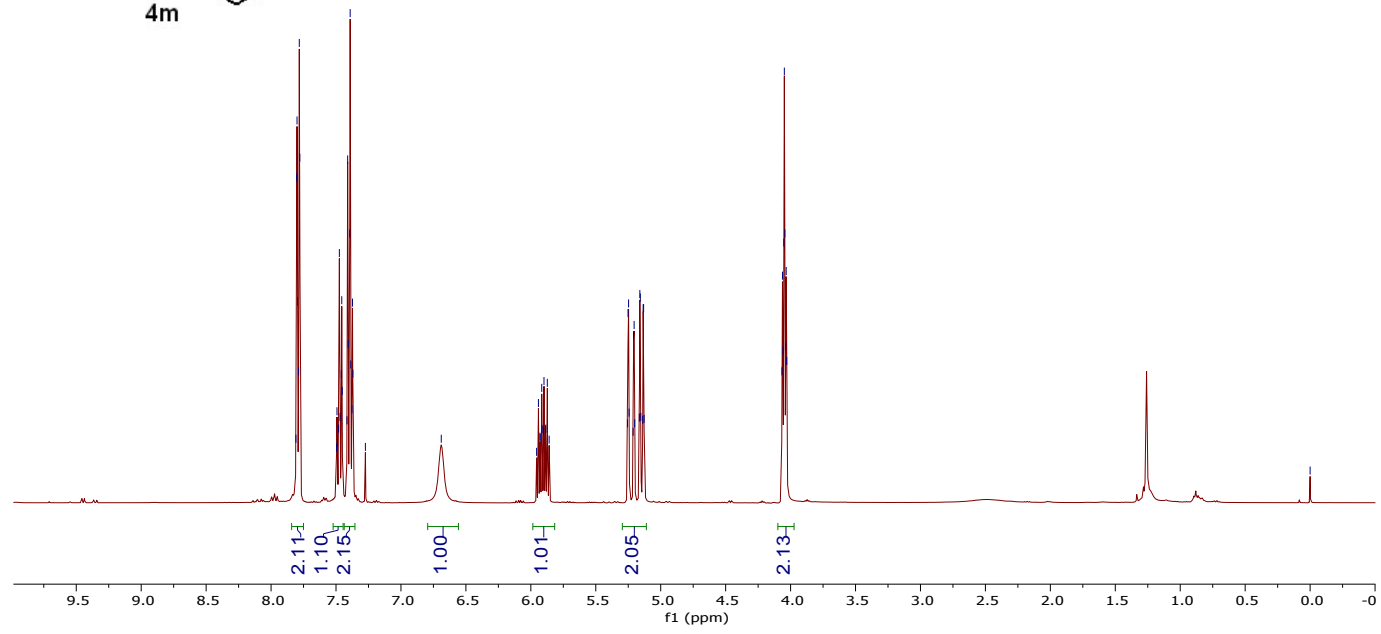

167.431  
134.317  
134.059  
131.338  
128.395  
126.886  
116.374  
77.318  
77.000  
76.682  
42.322

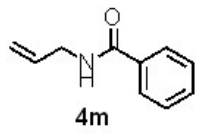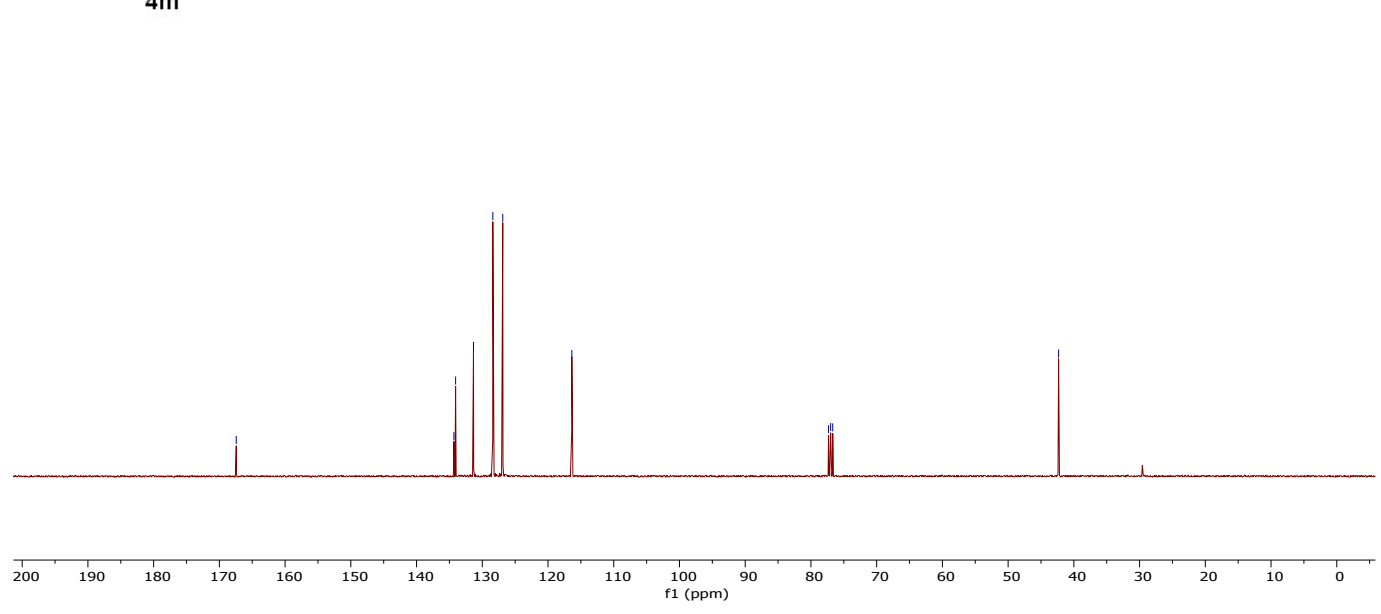

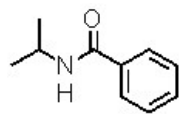

4n

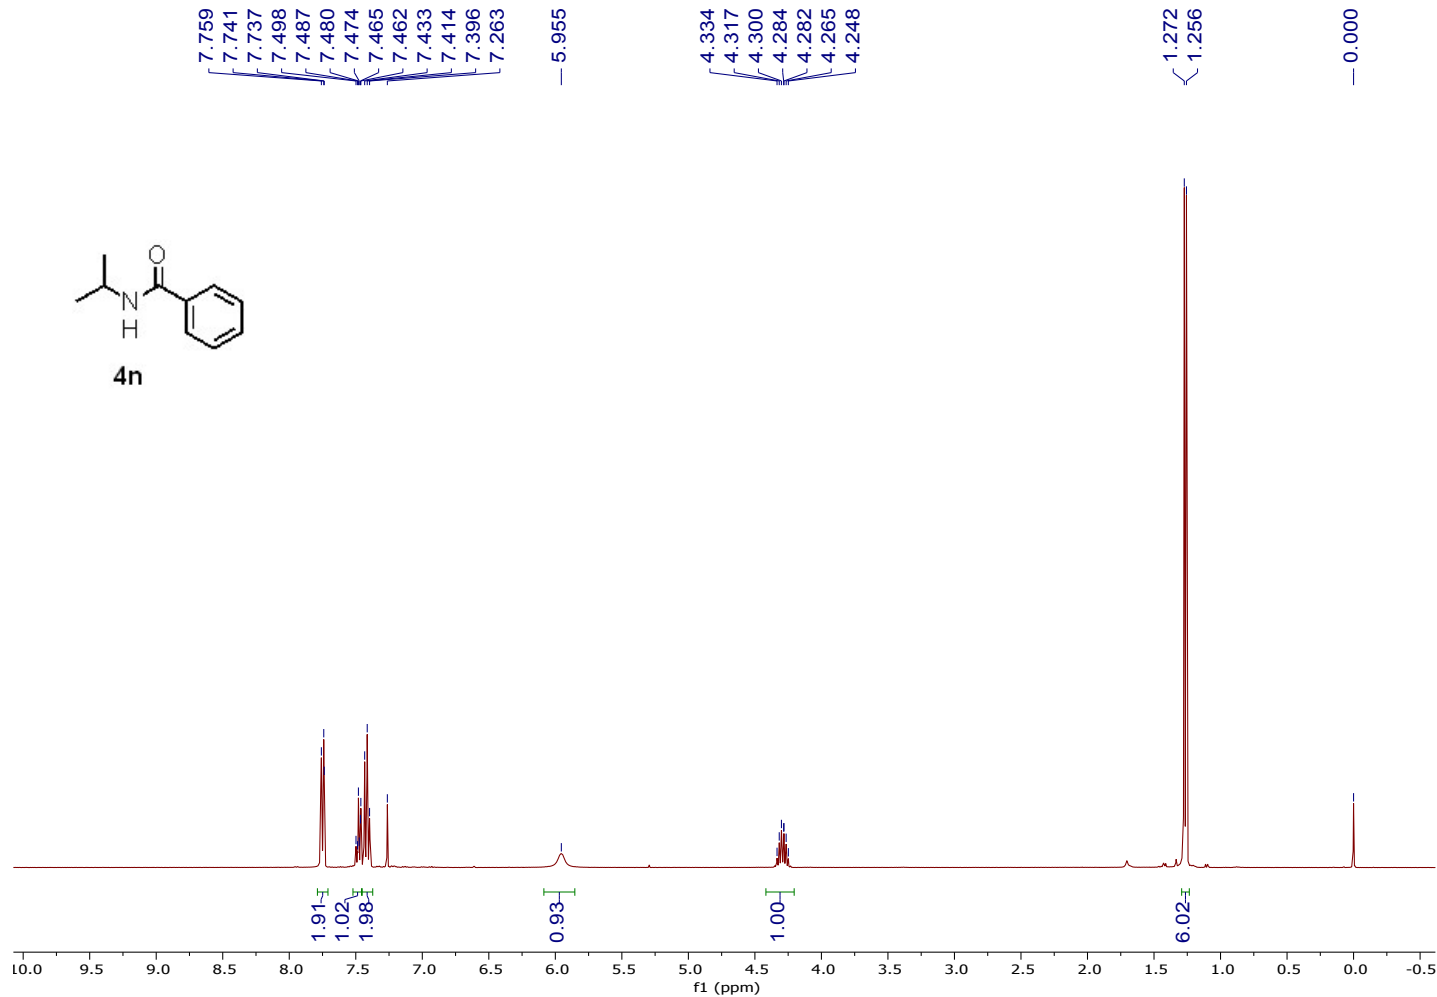

166.643

134.999  
131.210  
128.471  
126.772

77.318  
77.000  
76.683

41.863

22.846

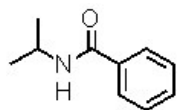

4n

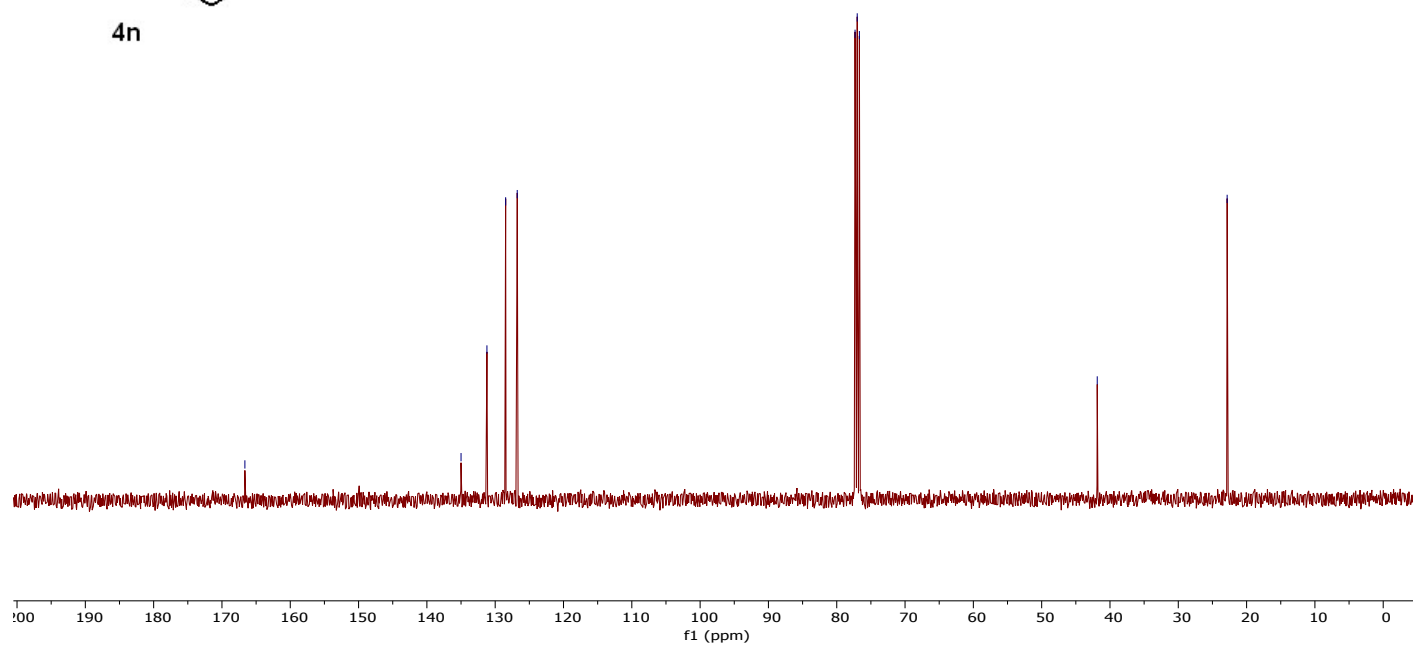

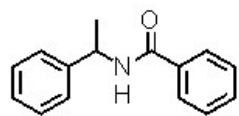

4o

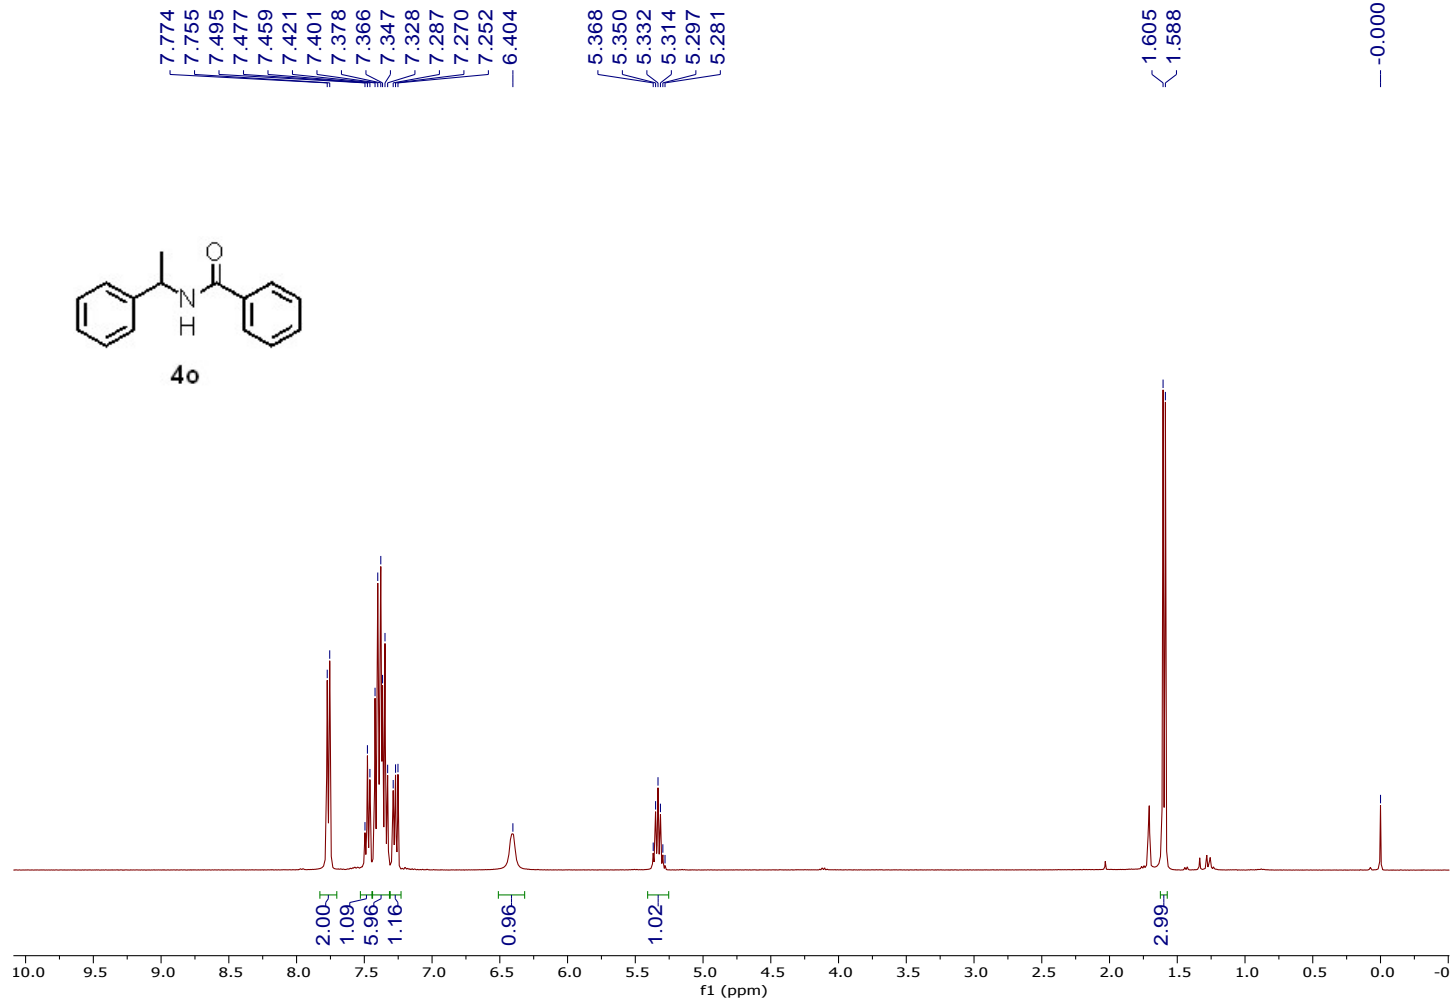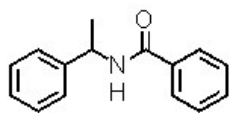

4o

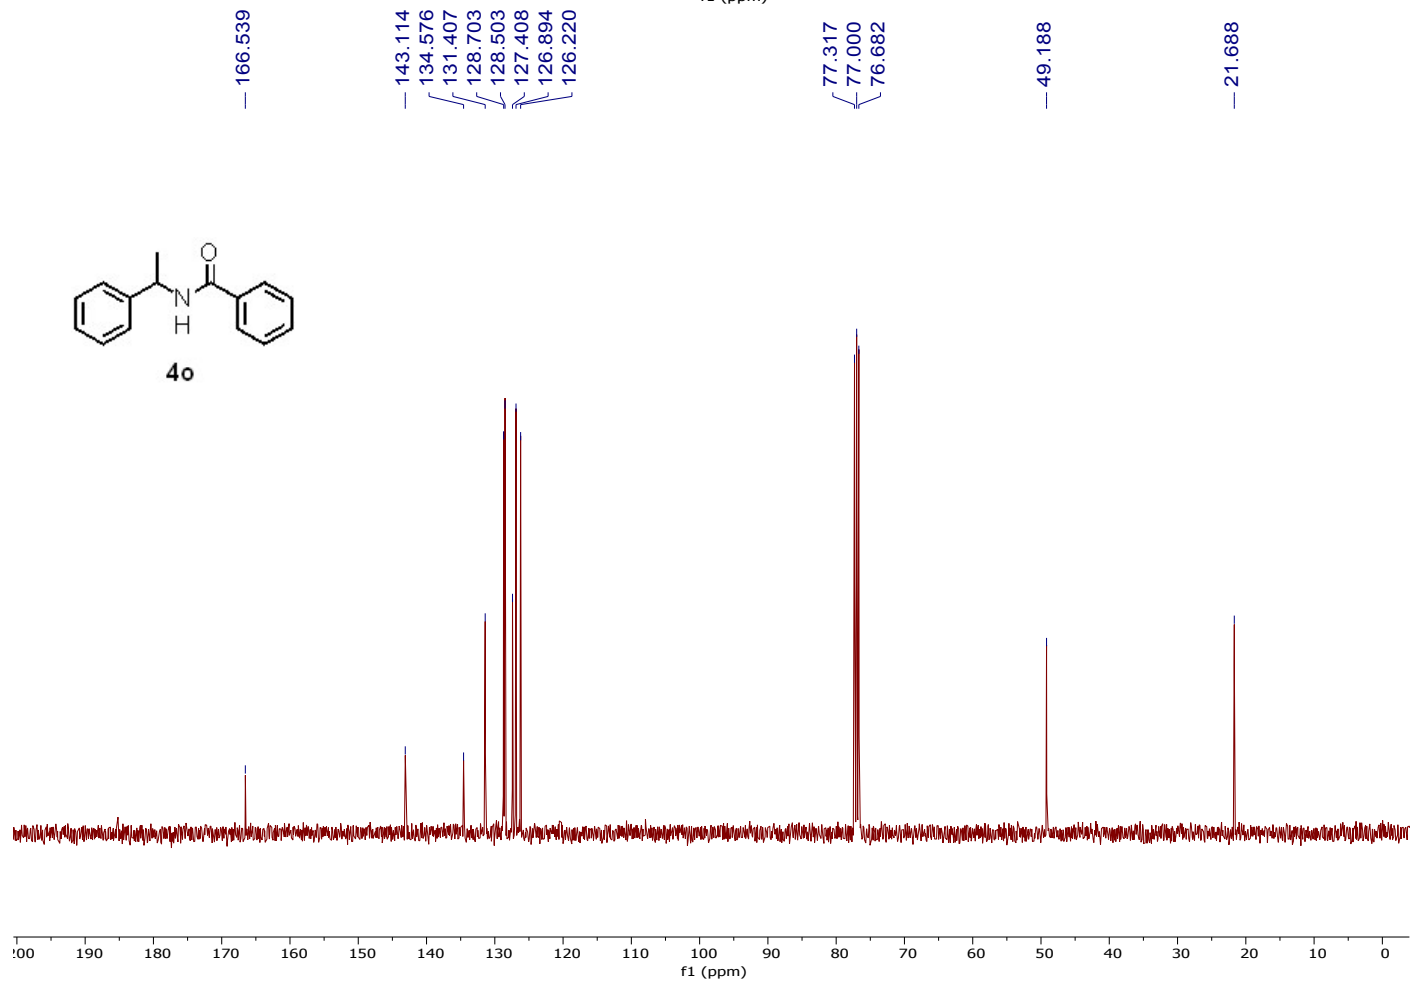

7.757  
7.738  
7.497  
7.479  
7.462  
7.434  
7.416  
7.396  
7.262  
5.984  
4.027  
4.018  
3.992  
3.981  
3.972  
3.945  
2.064  
2.054  
2.043  
2.023  
2.013  
1.792  
1.782  
1.772  
1.761  
1.748  
1.738  
1.728  
1.718  
1.670  
1.649  
1.639  
1.629  
1.487  
1.478  
1.470  
1.457  
1.448  
1.440  
1.425  
1.417  
1.394  
1.385  
1.376  
1.333  
1.285  
1.279  
1.257  
1.248  
1.231  
1.223  
1.201  
1.193  
1.184  
1.163

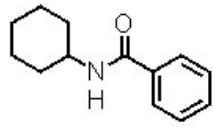

4p

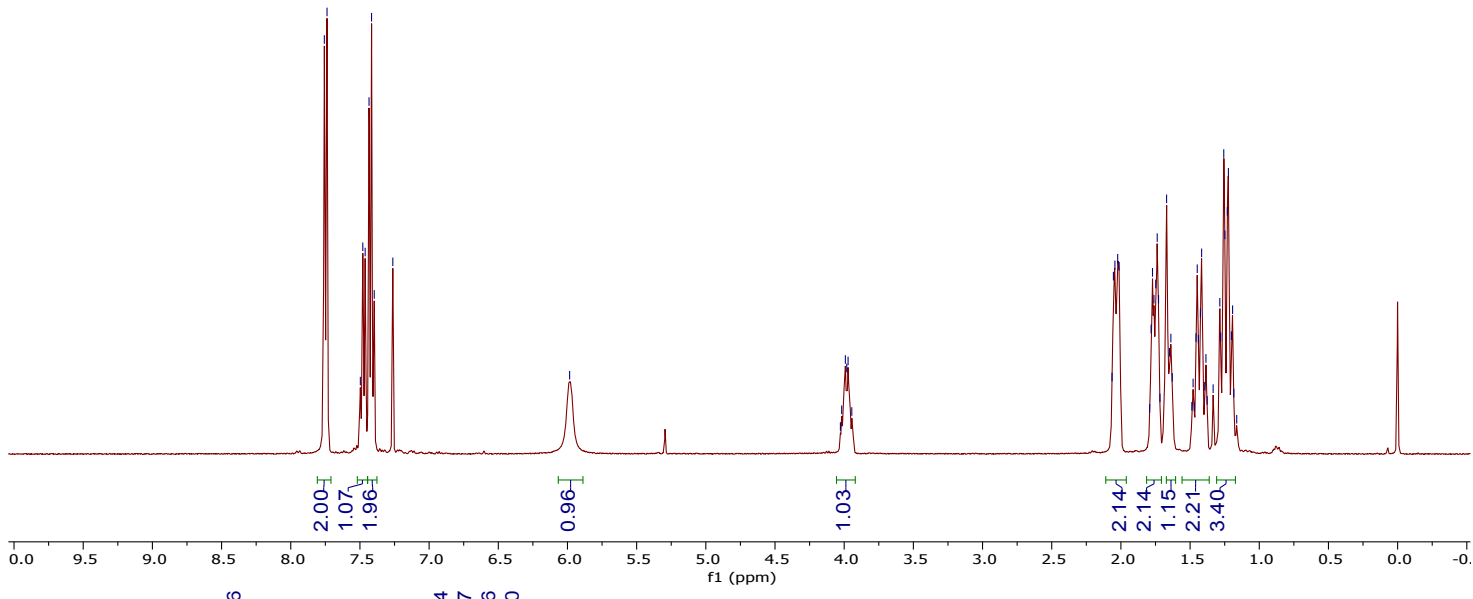

166.586  
135.124  
131.187  
128.476  
126.790  
48.649  
33.230  
25.574  
24.893

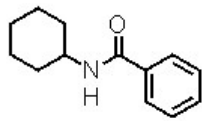

4p

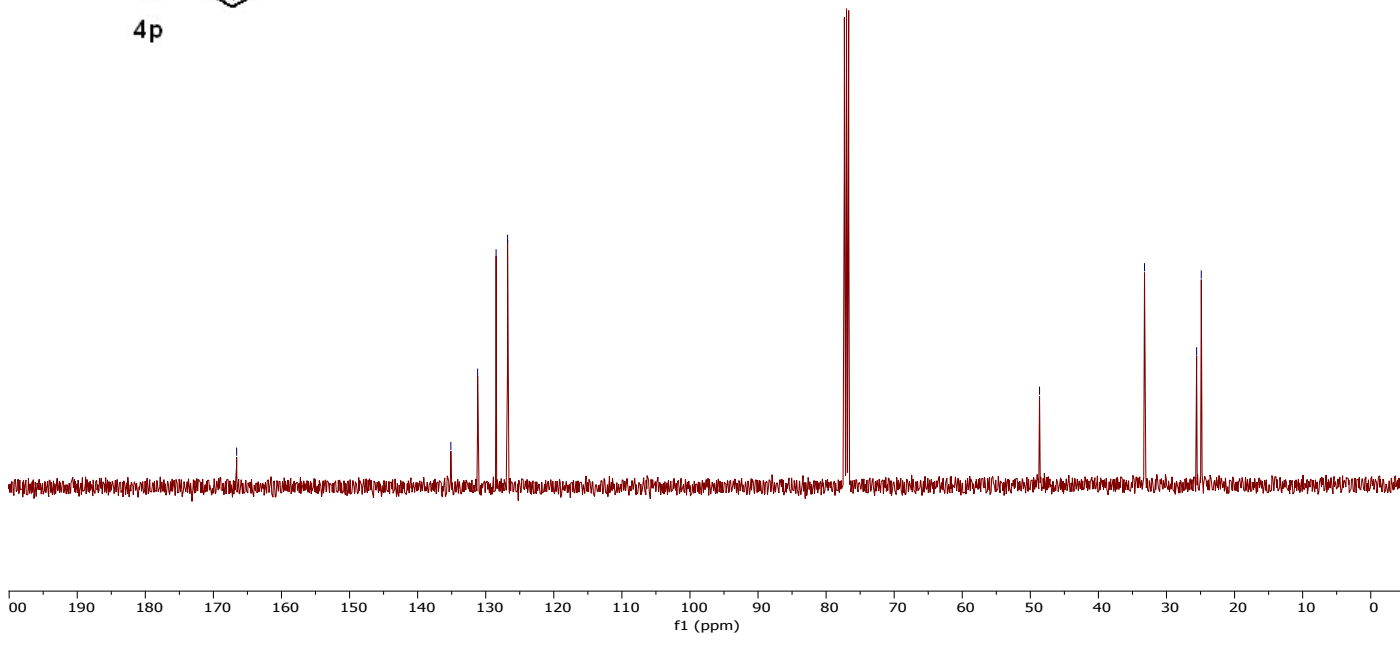

7.810  
7.807  
7.805  
7.802  
7.798  
7.795  
7.790  
7.785  
7.780  
7.780  
7.490  
7.487  
7.483  
7.478  
7.472  
7.468  
7.463  
7.457  
7.453  
7.450  
7.447  
7.425  
7.419  
7.415  
7.410  
7.406  
7.404  
7.400  
7.395  
7.391  
7.386  
7.382  
7.379  
7.377  
7.373  
7.370  
7.363  
7.262  
7.133  
7.115  
4.376  
4.393  
3.732  
3.724  
3.714  
3.707  
3.697  
3.689  
3.672  
3.508  
3.499  
3.496  
3.488  
3.473  
3.464  
3.461  
3.453  
1.323  
1.306

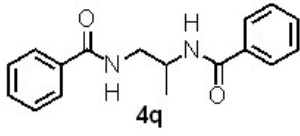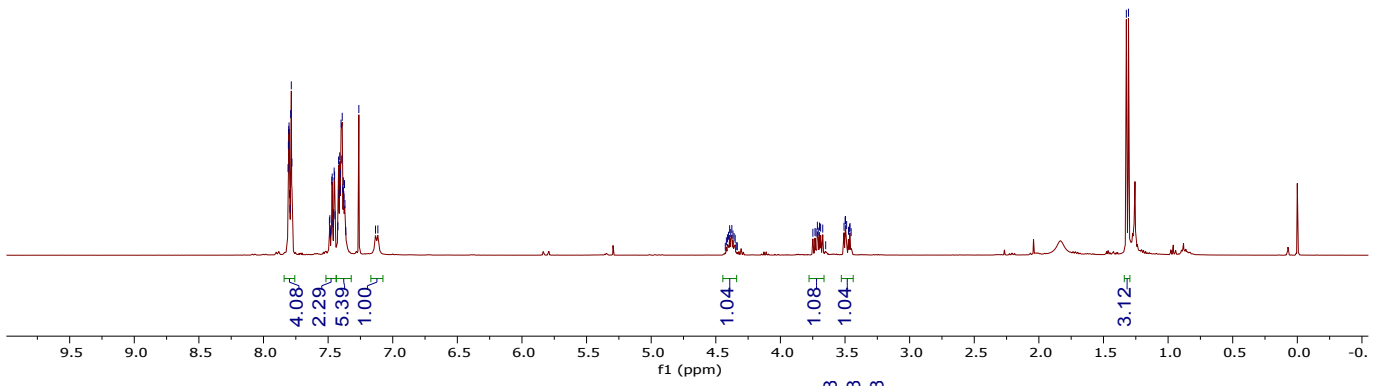

168.807  
168.212

134.049  
133.912  
131.574  
131.527  
128.548  
128.531  
127.007

77.318 CDCl3  
77.000 CDCl3  
76.683 CDCl3

47.240  
46.521

18.399

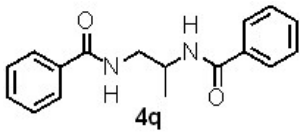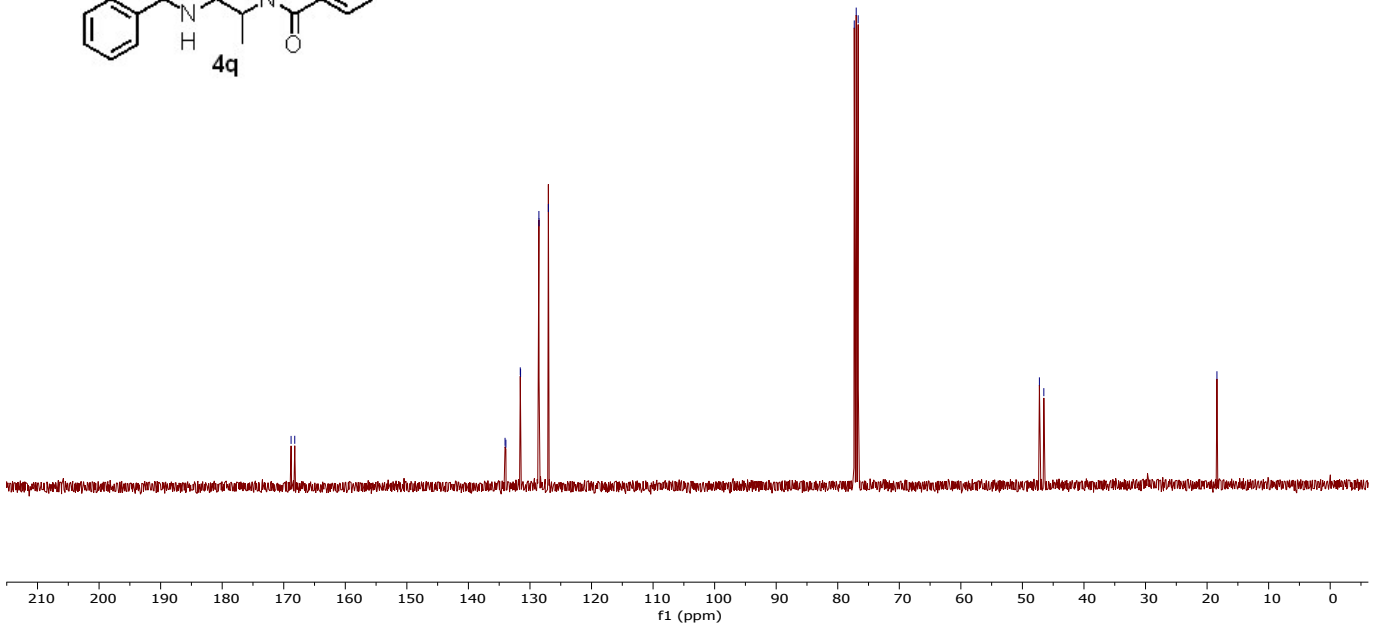

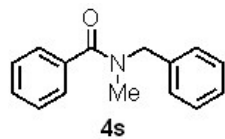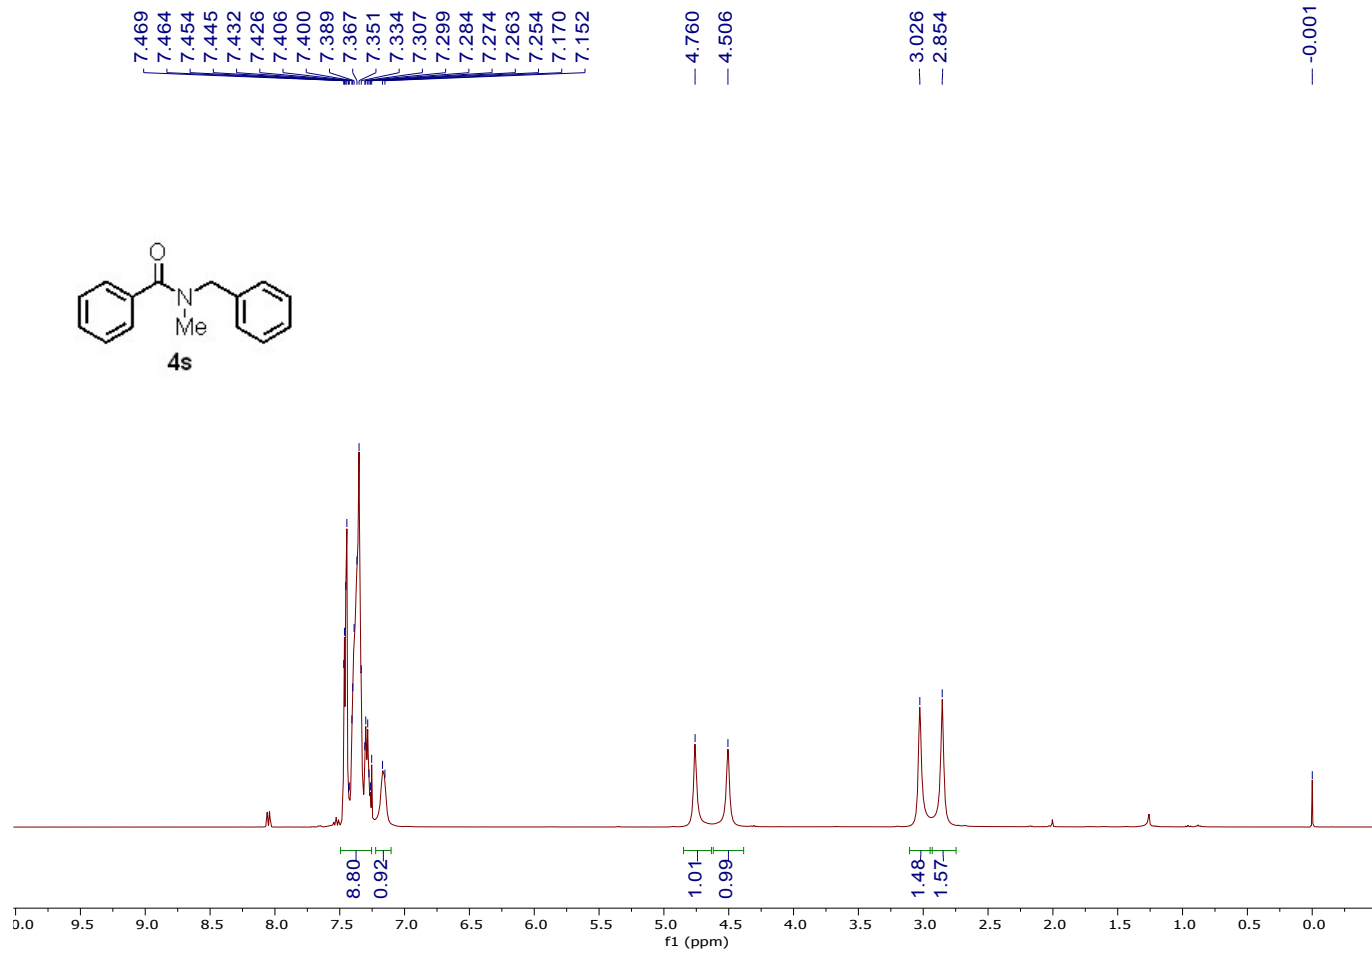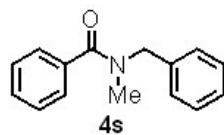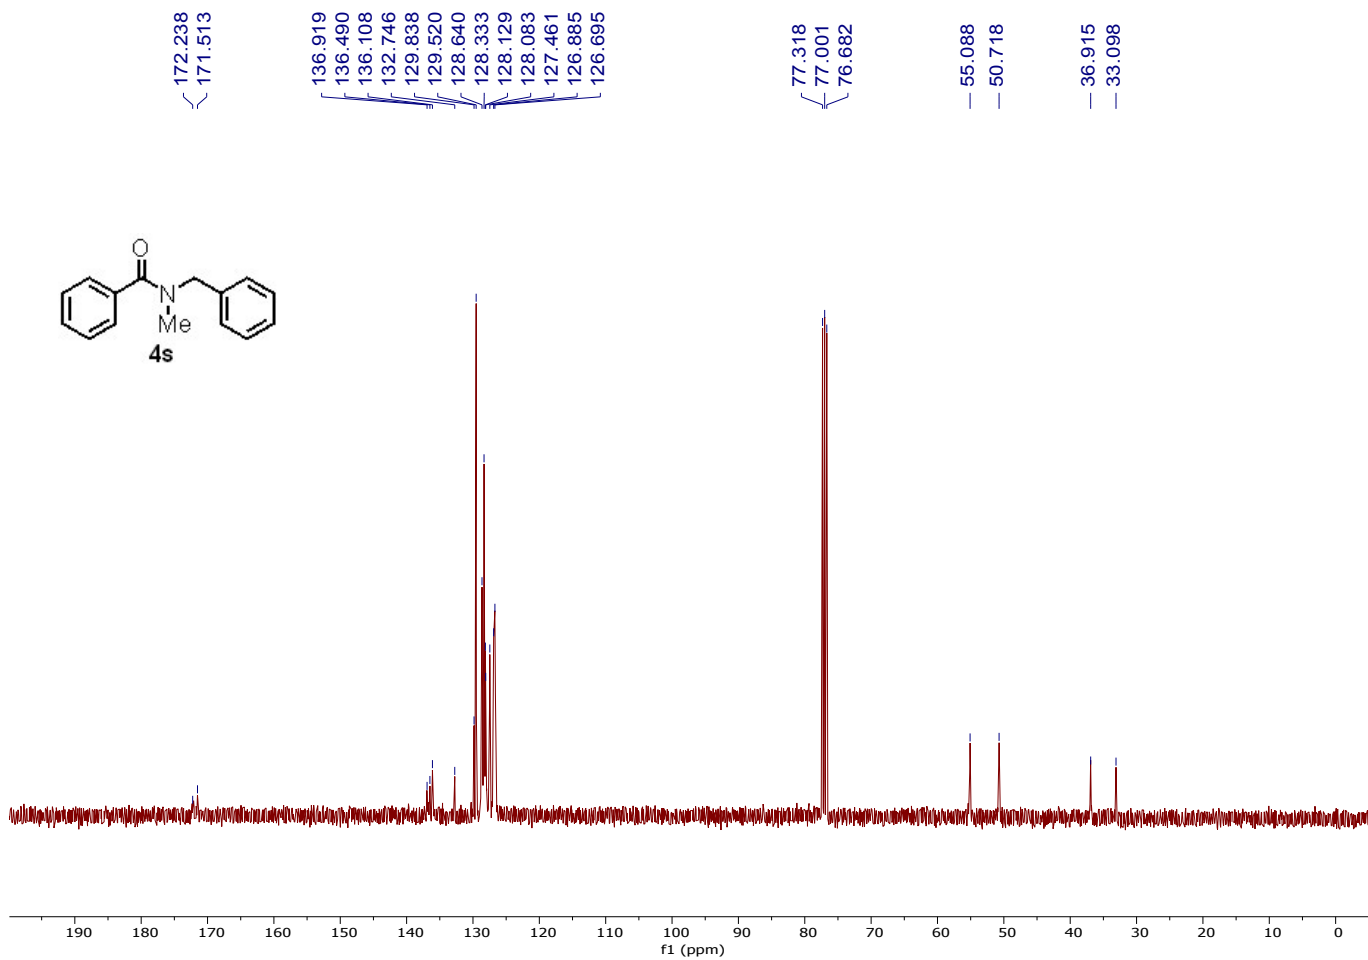

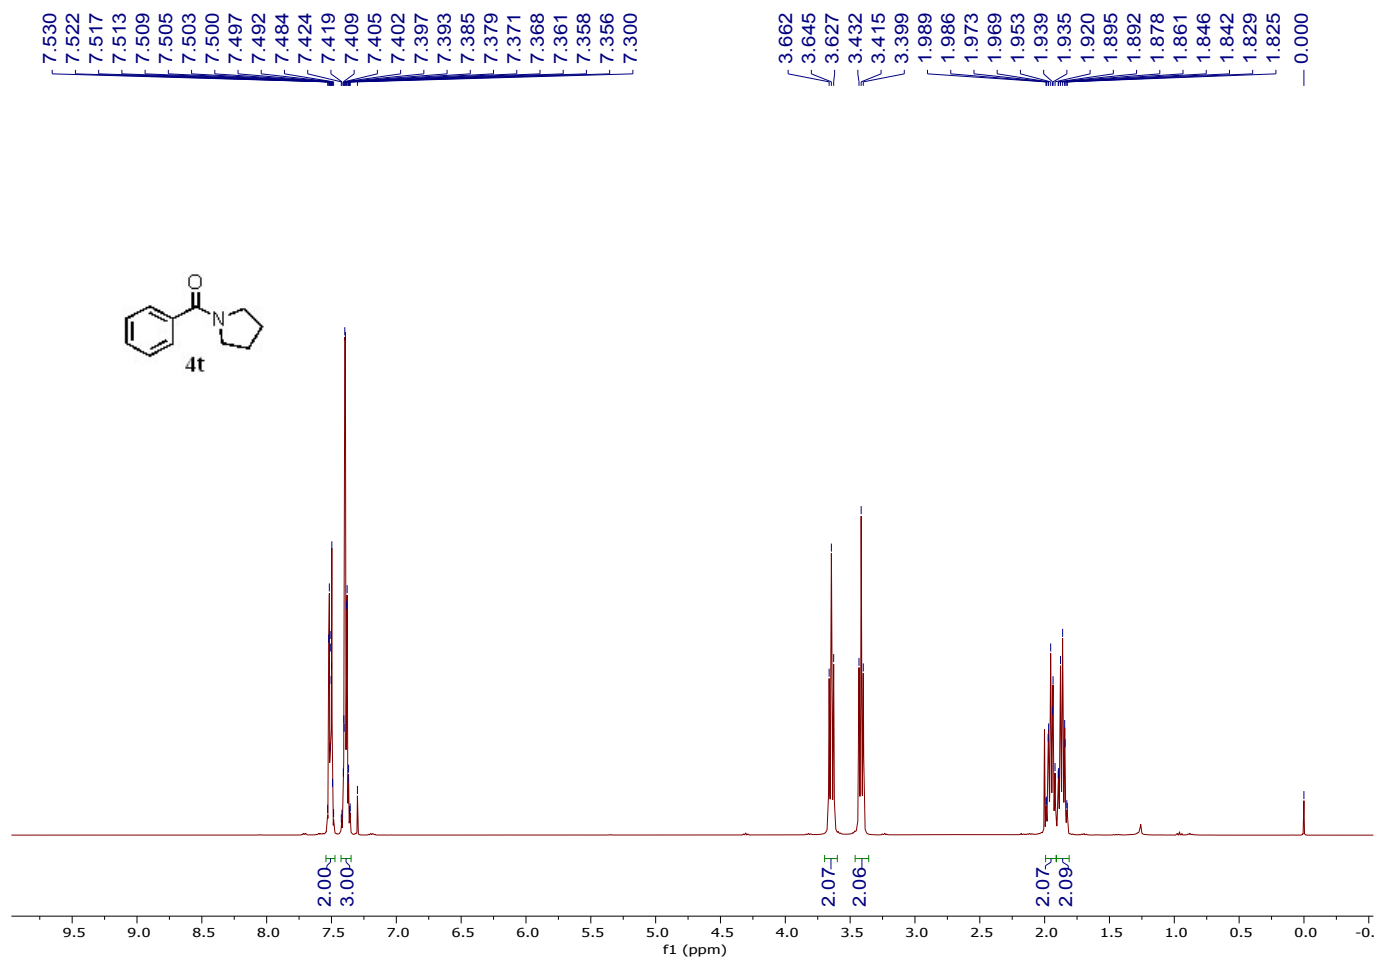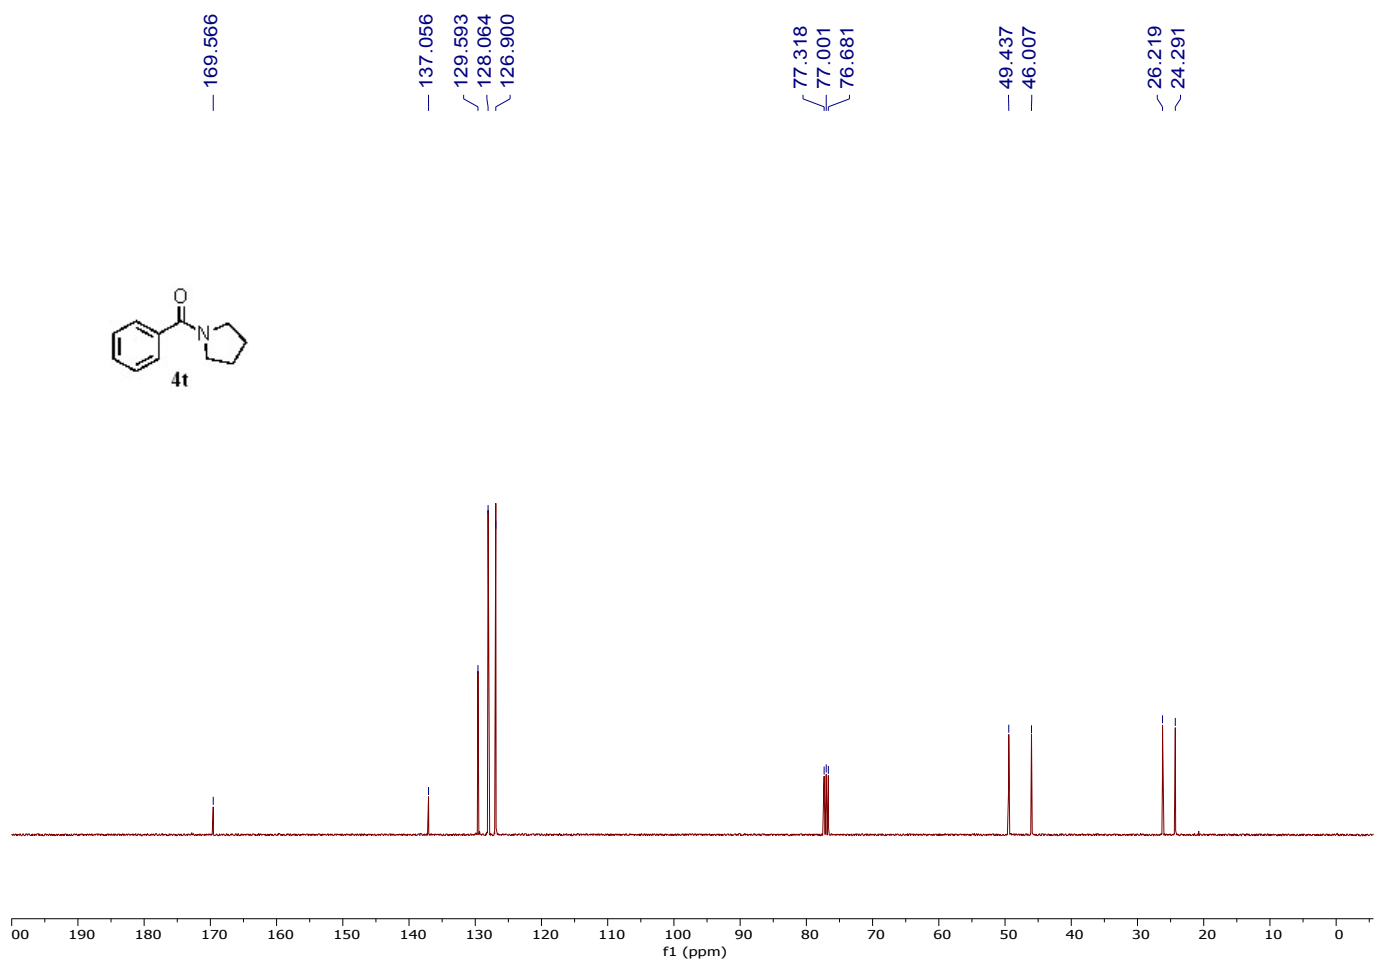



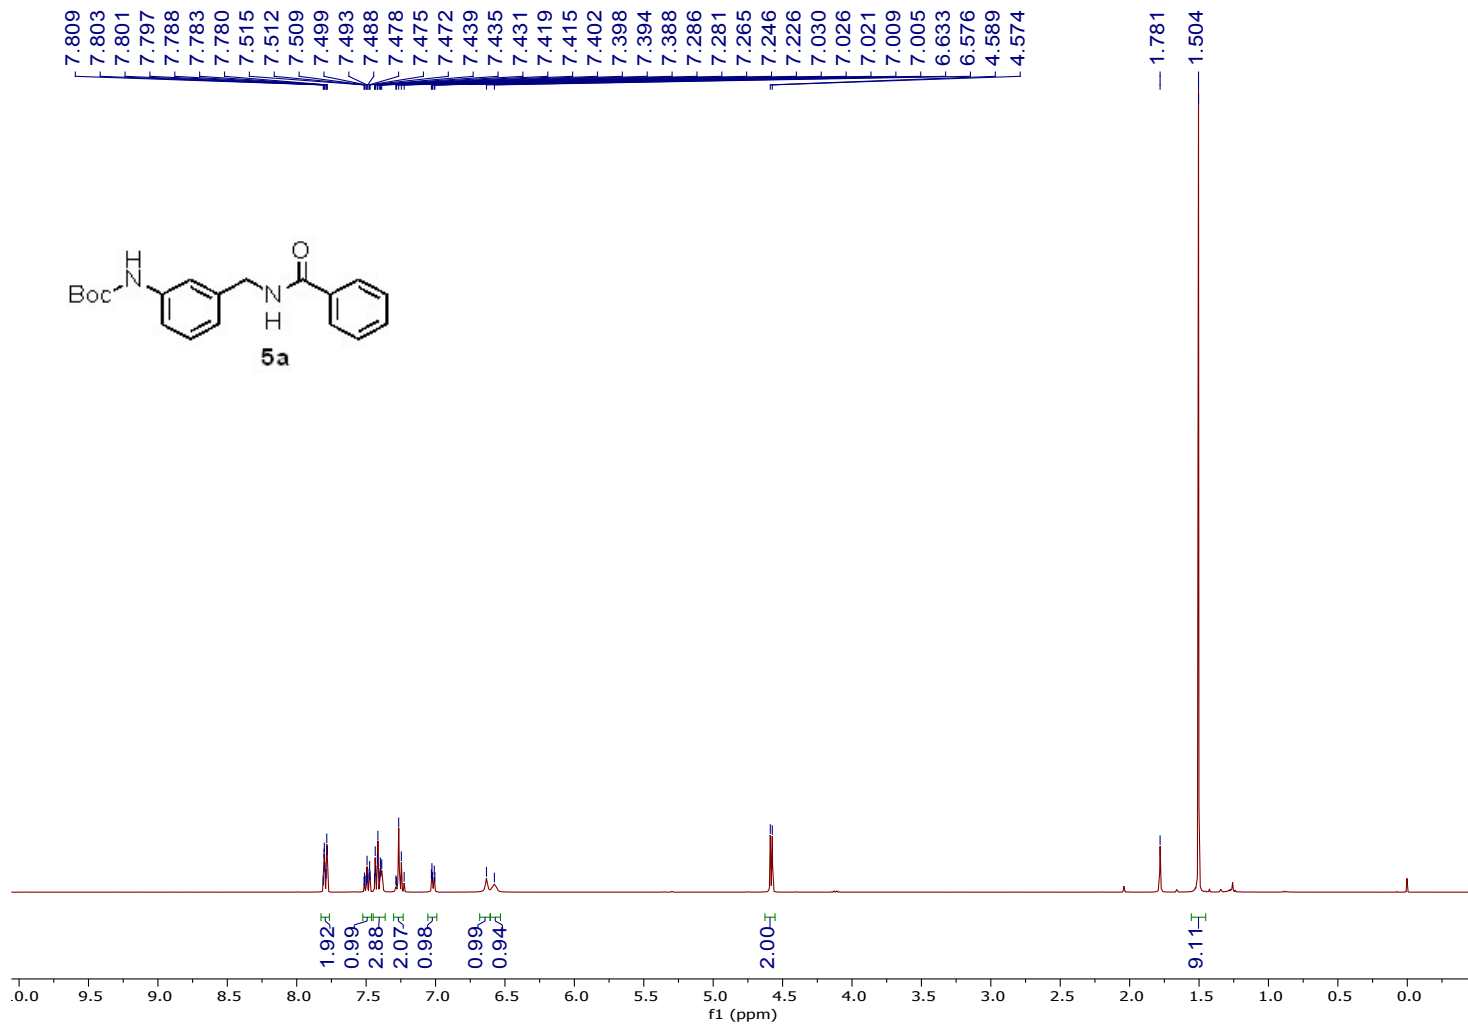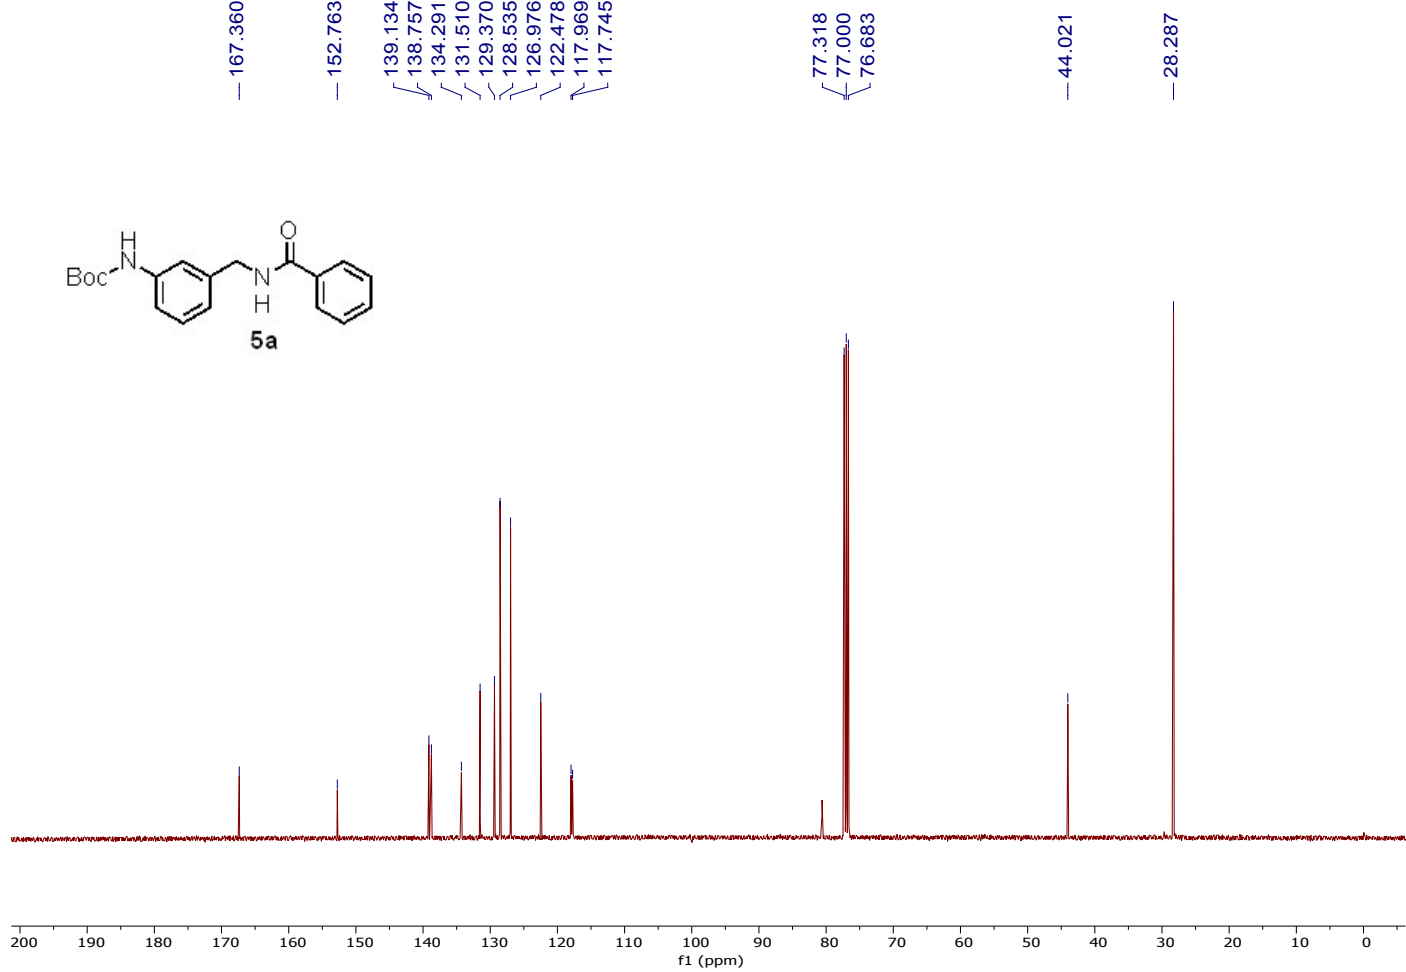

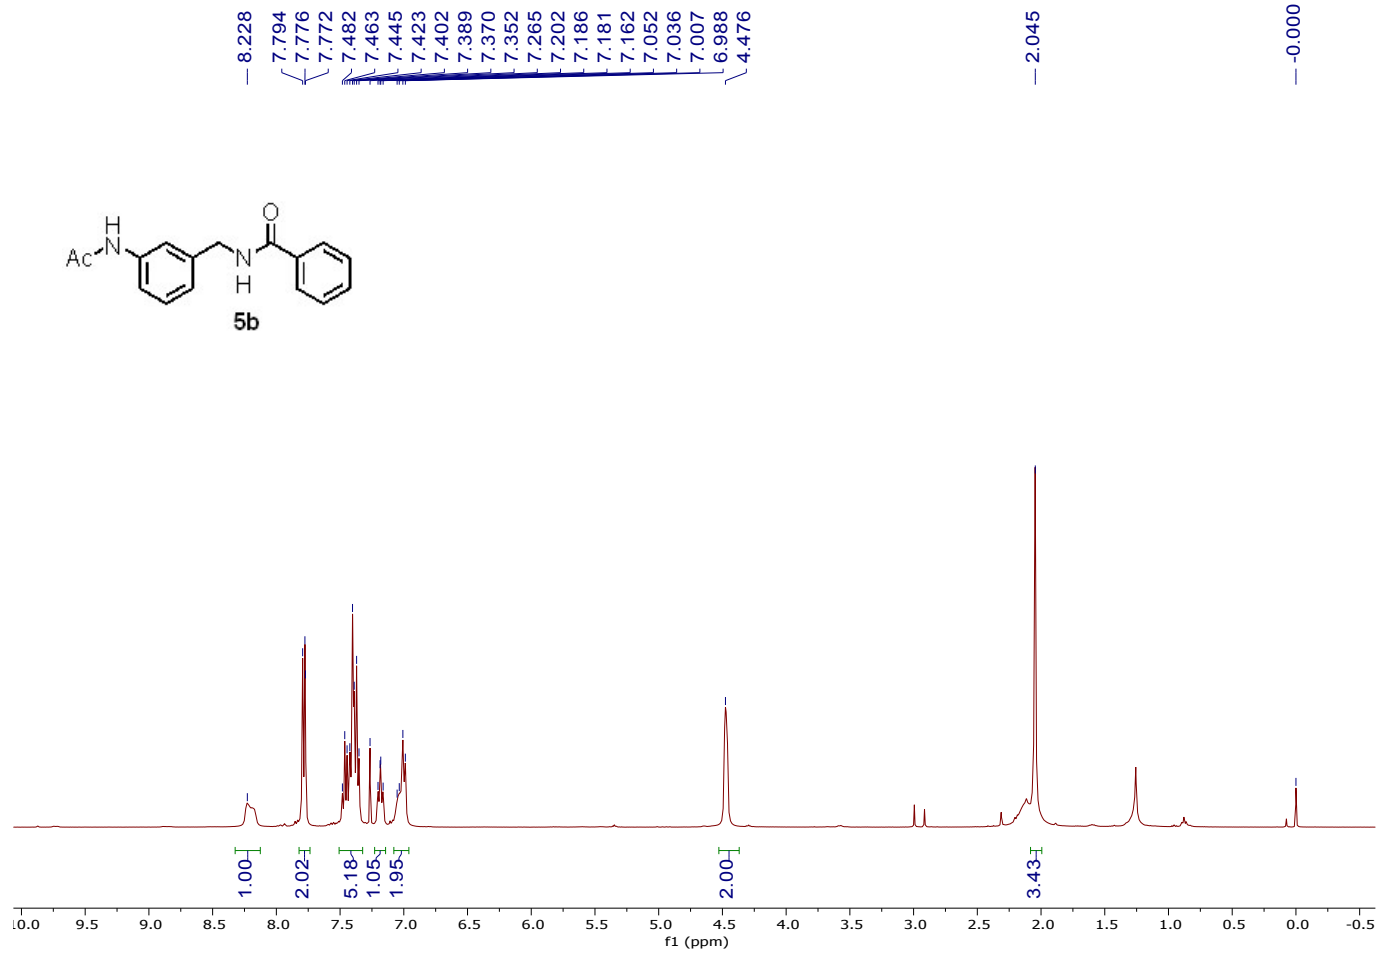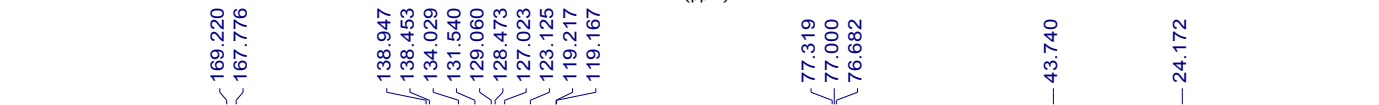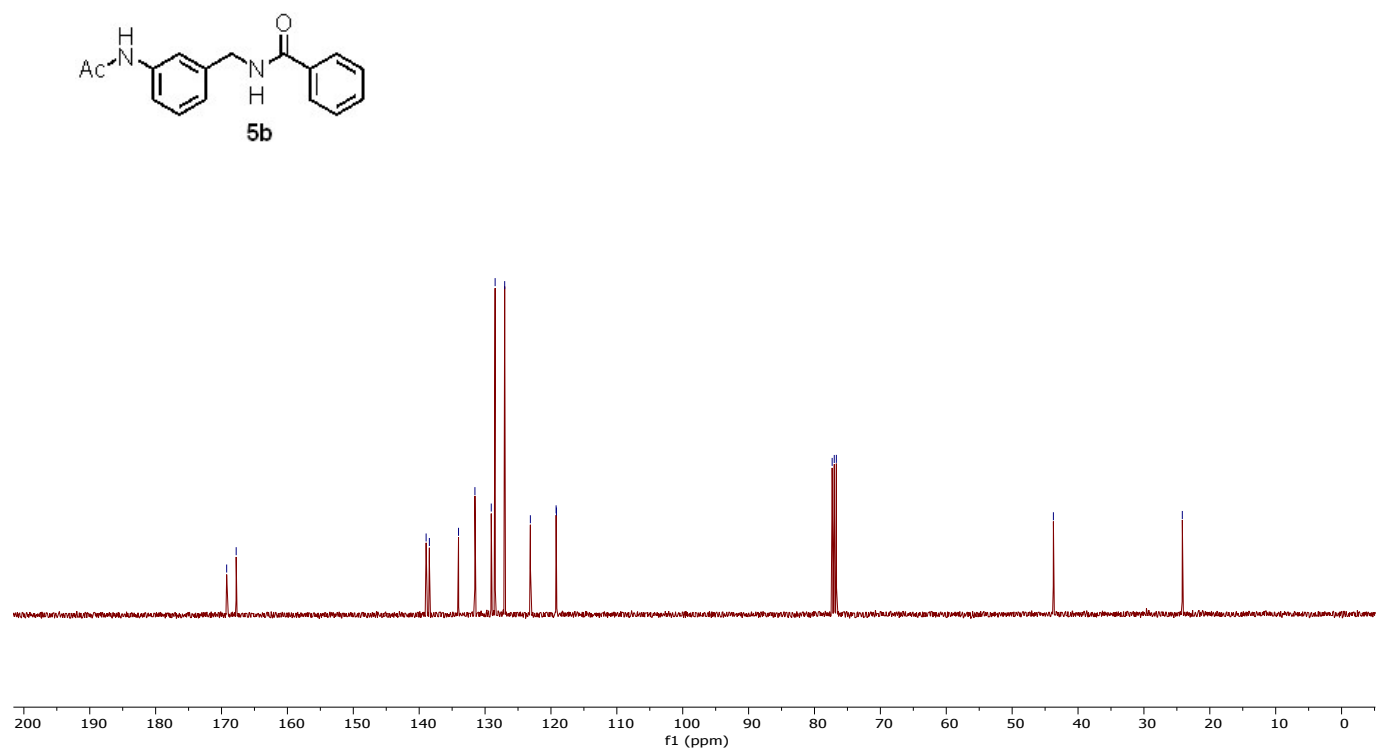

Supplement: c7cc09310a1.pdf [file c7cc09310a1.pdf]
